# Supplementary material for: Spatiotemporal Transcriptomics of Human Cardiovascular Progenitors in Pig Hearts Identifies MIDKINE as a Positive Regulator of Neovascularization
Source: Research Square preprint supplement (doi:10.21203/rs.3.rs-5837914/v1), 2025-01-31
Supplement: Supplementary file 1 [file c0035175927f983ad226ac12.xlsx]

## Sheet: Summary
Worksheet	Description
a	Summary table of gene and spot counts pre and post-quality control in AMI and CMI models spatial transcriptomes
b	Summary of spot clusters (at gene and spot level per cluster) for AMI 1- and 2-weeks and CMI 1-, 4- and 12-weeks post-transplantation Spatial transcriptomics data
c	List of significantly differentially expressed (DE) human genes in the human cardiovascular progenitors (CVPs) engrafted region in 1- and 2-weeks post-transplantation in the AMI model
d	List of significantly differentially expressed (DE) human genes in the human cardiovascular progenitors (CVPs) engrafted region in 1-, 4- and 12-weeks post-transplantation in the CMI model

## Sheet: a
		Pre-QC		Post-QC
Model	Timepoint	Rep1	Rep2	Rep1	Rep2
Acute	1-week	3317	2433	3225	2381
Acute	2-weeks	2916	3070	2862	3021
Chronic	1-week	3628	2771	3535	2543
Chronic	4-weeks	3781	3054	3748	3049
Chronic	12-weeks	3720	2380	3115	2316

## Sheet: b
ACUTE MODEL
Cluster	Total DE Genes	Human genes	Total spots	Spots with at least 1%human genes	%Spots with Human Genes
0	227	881	1890	0	0
1	215	976	1585	7	0.4
2	204	926	1353	0	0
3	195	1389	1111	0	0
4	174	1438	1079	2	0.2
5	192	849	951	4	0.4
6	60	1604	895	43	4.8
7	31	393	770	66	8.6
8	135	489	496	0	0
9	1414	2568	477	425	89.1
10	1722	2637	331	321	97
11	14	569	307	10	3.3
12	115	953	238	7	2.9
CHRONIC MODEL
Cluster	Total DE Genes	Human genes	Total spots	Spots with at least 1%human genes	%Spots with Human Genes
0	623	1452	3152	83	2.6
1	709	1207	2583	22	0.9
2	504	1022	1880	12	0.6
3	2329	3144	1804	1535	85.1
4	720	1454	1601	8	0.5
5	727	1287	1551	1	0.1
6	430	946	1426	32	2.2
7	2646	4167	1302	1302	100
8	898	1751	1020	688	67.5
9	574	850	548	7	1.3
10	540	793	536	11	2.1
11	8	67	391	63	16.1
12	667	1326	218	134	61.5
13	146	1262	132	4	3

## Sheet: c
Significantly DE genes in human engrafted cluster 9 & 10 in 1- and 2-weeks post transplantation
Gene	p_val	avg_log2FC	pct.1	pct.2	p_val_adj	cluster
ACTC1	0	3.52035	1	0.199	0	9		avg_log2FC	Average fold change between human clustersvs other clusters
MYH7	0	3.28911	1	0.237	0	9		pct.1	fraction of spots in other clusters expressing each marker gene
MYL2	0	3.88194	1	0.252	0	9		pct.2	fraction of spots in the human cluster expressing each marker gene
MYL7	0	3.5505	1	0.367	0	9
RPLP1	0	3.27944	1	0.171	0	9
TNNC1	0	2.93148	1	0.212	0	9
TPM1	0	3.48232	1	0.252	0	9
GAPDH	0	3.20227	0.998	0.196	0	9
HSPB1	0	4.41021	0.998	0.166	0	9
MT-CO2	0	3.56884	0.998	0.199	0	9
MYL3	0	3.01302	0.998	0.198	0	9
RPL41	0	3.51935	0.998	0.168	0	9
MT-CO3	0	3.23337	0.996	0.205	0	9
MYL4	0	2.94971	0.996	0.186	0	9
TNNT2	0	2.98997	0.996	0.174	0	9
CRYAB	0	4.3198	0.994	0.123	0	9
TNNI1	0	2.78956	0.994	0.187	0	9
HSPA1A	0	5.16002	0.992	0.102	0	9
MYL6	0	2.65237	0.99	0.172	0	9
EEF1A1	0	3.49971	0.987	0.141	0	9
NPPA	0	3.41994	0.987	0.146	0	9
UBC	0	3.94645	0.987	0.111	0	9
RPL37A	0	3.36533	0.985	0.13	0	9
RPL10	0	2.89039	0.983	0.137	0	9
RPL13	0	2.86302	0.981	0.124	0	9
RPS27	0	2.91901	0.981	0.117	0	9
RPS29	0	3.04857	0.979	0.108	0	9
HSP90AA1	0	4.26088	0.977	0.106	0	9
RPS2	0	2.95181	0.977	0.134	0	9
TMSB10	0	2.9798	0.977	0.128	0	9
MT-CO1	0	3.74775	0.975	0.158	0	9
RPS15	0	2.55323	0.975	0.127	0	9
SERF2	3.05226e-307	2.14103	0.975	0.366	4.7017e-303	9
MT-ND4	0	3.37914	0.973	0.176	0	9
RPS15A	0	2.96053	0.969	0.103	0	9
RPL37	0	3.03464	0.966	0.105	0	9
SERPINH1	0	3.83946	0.966	0.09	0	9
RPS28	0	2.71366	0.964	0.121	0	9
RPL32	0	2.86763	0.962	0.107	0	9
RPS19	0	2.66327	0.962	0.126	0	9
RPL13A	0	2.6027	0.96	0.105	0	9
RPL18A	0	2.61742	0.96	0.119	0	9
MT-ATP6	0	3.21398	0.958	0.162	0	9
RPL35	0	2.50812	0.958	0.121	0	9
TTN	0	2.63321	0.956	0.124	0	9
HSPA8	0	3.38179	0.954	0.088	0	9
MT-CYB	0	2.95331	0.954	0.145	0	9
RPL35A	0	2.68707	0.954	0.093	0	9
RPS12	0	3.0962	0.954	0.093	0	9
RPS18	0	2.8233	0.954	0.109	0	9
RPS8	0	3.01226	0.954	0.094	0	9
MYL9	0	2.45205	0.952	0.131	0	9
RPL8	0	2.55235	0.952	0.118	0	9
HSPA6	0	3.95088	0.95	0.07	0	9
MT-ND3	0	3.40233	0.95	0.134	0	9
FTH1	0	2.96811	0.948	0.115	0	9
RPL36	0	2.50628	0.948	0.115	0	9
SELENOW	0	2.65502	0.948	0.117	0	9
RPL27	0	2.38725	0.943	0.089	0	9
RPL28	0	2.64647	0.943	0.108	0	9
RPS14	0	2.60724	0.943	0.11	0	9
HSPB7	0	2.3134	0.939	0.105	0	9
RPL7A	0	2.42293	0.939	0.095	0	9
UQCR11	0	2.23253	0.939	0.098	0	9
RPLP2	0	2.47906	0.937	0.106	0	9
UBB	0	3.00418	0.937	0.099	0	9
BAG3	0	3.91637	0.935	0.055	0	9
RPL9	0	2.79116	0.935	0.085	0	9
CSRP3	0	3.16738	0.933	0.088	0	9
RPL29	0	2.65067	0.933	0.107	0	9
RPS23	0	2.9168	0.933	0.092	0	9
TPT1	0	3.35451	0.933	0.106	0	9
DNAJB1	0	3.90366	0.931	0.06	0	9
GNAS	0	2.68987	0.929	0.09	0	9
RPS21	0	2.4124	0.929	0.1	0	9
FAU	0	2.17862	0.925	0.097	0	9
FLNC	0	2.86986	0.925	0.095	0	9
RPL18	0	2.2879	0.925	0.106	0	9
RPL30	0	2.56324	0.925	0.091	0	9
RPL39	0	2.77294	0.925	0.096	0	9
FABP3	0	2.43203	0.922	0.074	0	9
RPL19	0	2.44035	0.922	0.081	0	9
RPL24	0	2.41523	0.922	0.084	0	9
RPS16	0	2.33365	0.922	0.086	0	9
COX7C	0	2.74583	0.92	0.082	0	9
NDUFA4	0	2.36527	0.92	0.08	0	9
RPL12	0	2.76118	0.92	0.089	0	9
RPL34	0	2.75788	0.92	0.079	0	9
ATP5ME	0	2.28965	0.918	0.093	0	9
RPL11	0	2.58042	0.918	0.105	0	9
RPL15	0	2.47815	0.918	0.095	0	9
RPLP0	0	2.41204	0.916	0.083	0	9
RPSA	0	2.2633	0.914	0.088	0	9
RPL21	0	2.69999	0.908	0.085	0	9
RPL31	0	2.55615	0.908	0.079	0	9
UQCRQ	0	2.16376	0.906	0.091	0	9
RPS24	0	2.84827	0.904	0.084	0	9
ANKRD1	0	2.97719	0.901	0.091	0	9
CKM	0	2.01312	0.899	0.09	0	9
RPS27A	0	2.66964	0.899	0.08	0	9
HSP90AB1	0	3.09828	0.897	0.068	0	9
RPL38	0	2.30945	0.897	0.076	0	9
UQCR10	0	2.16326	0.897	0.077	0	9
RPL4	0	2.59143	0.895	0.084	0	9
RPS11	0	1.96616	0.895	0.081	0	9
RPS3A	0	2.87585	0.895	0.087	0	9
DLK1	0	3.48287	0.893	0.078	0	9
NDUFB2	0	1.89074	0.893	0.074	0	9
RPL3	0	2.24517	0.893	0.082	0	9
COX6B1	0	2.06899	0.891	0.084	0	9
COX8A	0	1.82029	0.891	0.086	0	9
NREP	0	2.53597	0.891	0.08	0	9
RPS13	0	2.53271	0.891	0.076	0	9
RPS3	0	2.24422	0.891	0.086	0	9
COX4I1	0	2.09252	0.887	0.081	0	9
MYBPC3	0	2.27292	0.887	0.105	0	9
FTL	0	2.51767	0.885	0.079	0	9
MDK	0	2.02275	0.885	0.113	0	9
NPPB	0	2.21424	0.885	0.103	0	9
RPS6	0	2.60439	0.885	0.072	0	9
RPS5	0	2.07687	0.881	0.08	0	9
ATP5MF	0	1.88599	0.878	0.076	0	9
TPI1	0	2.11834	0.878	0.09	0	9
COX5B	0	1.92292	0.876	0.095	0	9
HSPH1	0	3.62735	0.876	0.06	0	9
RPL26	0	2.70706	0.876	0.071	0	9
RPS25	0	2.49712	0.874	0.07	0	9
UBA52	0	2.13203	0.874	0.071	0	9
RPS7	0	2.43327	0.872	0.078	0	9
ATP5F1B	0	2.20539	0.87	0.084	0	9
COX7B	0	2.35797	0.868	0.077	0	9
VIM	0	2.17617	0.868	0.074	0	9
MGST3	0	2.09988	0.866	0.066	0	9
PKM	0	1.95032	0.866	0.084	0	9
PLN	0	2.39744	0.866	0.079	0	9
RPL23	0	1.97212	0.866	0.064	0	9
RPL6	0	2.34456	0.866	0.074	0	9
RPL23A	0	2.38013	0.862	0.07	0	9
COL3A1	0	3.21378	0.86	0.066	0	9
COX6C	0	2.33497	0.86	0.071	0	9
LDHA	0	2.19037	0.86	0.077	0	9
RPS10	0	2.13292	0.86	0.082	0	9
TUBA1B	0	2.01596	0.86	0.076	0	9
ACTN2	0	2.27065	0.855	0.073	0	9
RPL36A	0	2.38361	0.855	0.064	0	9
SRP14	0	2.36547	0.855	0.069	0	9
HSPA1B	0	2.58842	0.853	0.035	0	9
RACK1	0	1.97454	0.853	0.072	0	9
RPS9	0	1.86335	0.853	0.084	0	9
TNNI3	0	2.08382	0.853	0.077	0	9
XIRP1	0	2.57502	0.853	0.056	0	9
KRT8	0	1.72594	0.851	0.085	0	9
ATP5MC3	0	1.80696	0.849	0.066	0	9
RPL27A	0	1.80144	0.849	0.06	0	9
UQCRH	0	2.38721	0.849	0.069	0	9
H3-3A	1.63394e-161	1.30193	0.845	0.359	2.51692e-157	9
PPIA	0	2.12572	0.845	0.072	0	9
POLR2L	0	1.75512	0.841	0.072	0	9
RPS4X	0	2.35812	0.841	0.065	0	9
COX5A	0	2.07537	0.839	0.069	0	9
RPL5	0	2.43348	0.839	0.072	0	9
UBL5	0	1.76317	0.839	0.077	0	9
NDUFB1	0	1.94611	0.834	0.062	0	9
CHCHD10	0	1.7084	0.832	0.077	0	9
ATP5MPL	0	1.92994	0.83	0.057	0	9
COX6A1	0	1.69019	0.83	0.066	0	9
EEF2	0	2.03324	0.83	0.071	0	9
HSPD1	0	3.0858	0.83	0.054	0	9
NDUFA11	0	1.60227	0.83	0.072	0	9
RPS26	0	1.75117	0.83	0.061	0	9
MT-ND1	0	2.27919	0.828	0.094	0	9
OST4	0	1.71166	0.828	0.066	0	9
RPL7	0	2.1772	0.828	0.072	0	9
COX7A2	0	1.80828	0.826	0.064	0	9
ELOB	0	1.58941	0.826	0.079	0	9
PRDX2	0	1.8188	0.826	0.077	0	9
RPL10A	0	2.0494	0.826	0.063	0	9
ATP5F1E	0	1.92621	0.824	0.065	0	9
ENO3	0	1.67566	0.82	0.077	0	9
DNAJA1	0	2.81804	0.818	0.049	0	9
MDH1	0	2.03303	0.818	0.064	0	9
RPS20	0	2.10087	0.818	0.06	0	9
COL18A1	0	1.59666	0.809	0.077	0	9
PFN1	0	1.63466	0.809	0.07	0	9
HINT1	0	1.83523	0.807	0.06	0	9
HSPE1	0	2.64099	0.807	0.05	0	9
ATP5MG	0	1.97681	0.805	0.059	0	9
DNAJA4	0	3.05711	0.805	0.035	0	9
CRIP2	0	1.85589	0.803	0.077	0	9
NDUFS5	0	1.71781	0.803	0.062	0	9
UNC45B	0	2.54387	0.803	0.051	0	9
ATP5MC1	0	1.41493	0.799	0.065	0	9
MIF	0	1.78678	0.799	0.06	0	9
RPL14	0	2.07661	0.799	0.057	0	9
LGALS1	0	1.65451	0.797	0.047	0	9
CNN1	0	1.83993	0.79	0.051	0	9
FHL2	0	1.84696	0.79	0.055	0	9
NDUFA1	0	1.99755	0.79	0.054	0	9
LDHB	0	2.02687	0.788	0.061	0	9
SLC25A4	0	1.88752	0.788	0.06	0	9
ATP5MD	0	2.0971	0.786	0.06	0	9
OAZ1	0	1.67703	0.784	0.064	0	9
NDUFS6	0	1.57851	0.782	0.067	0	9
CFL1	0	1.47334	0.78	0.063	0	9
CD81	0	1.42026	0.778	0.055	0	9
DYNLL1	0	1.99923	0.778	0.055	0	9
GNG5	0	1.7951	0.778	0.056	0	9
MT-ND2	0	2.00032	0.778	0.077	0	9
RPS17	0	1.59087	0.778	0.05	0	9
TMA7	0	1.62599	0.778	0.049	0	9
ATP5F1A	0	1.70753	0.776	0.063	0	9
EIF1	0	1.89701	0.776	0.052	0	9
HSPA5	0	2.36563	0.776	0.049	0	9
LAPTM4B	0	1.82222	0.776	0.061	0	9
ATP5MC2	0	1.51379	0.774	0.052	0	9
ATP5PF	0	1.84773	0.774	0.06	0	9
PGAM1	0	1.60072	0.771	0.064	0	9
RPL22	0	2.11839	0.771	0.05	0	9
IGFBP7	0	1.52109	0.767	0.051	0	9
KRT18	0	1.58081	0.767	0.068	0	9
ATP1A1	0	1.61185	0.765	0.046	0	9
IDH2	0	1.34792	0.765	0.06	0	9
ENO1	0	1.75325	0.763	0.074	0	9
SPARC	0	2.17518	0.763	0.064	0	9
TUBB	0	1.36493	0.761	0.07	0	9
PGK1	0	1.81745	0.759	0.058	0	9
SLC25A6	0	1.53099	0.759	0.056	0	9
CD63	0	1.54894	0.757	0.059	0	9
TNFRSF12A	0	1.5822	0.757	0.053	0	9
COL1A1	0	2.30127	0.755	0.128	0	9
EEF1A2	0	1.41153	0.753	0.066	0	9
NDUFA13	0	1.47869	0.751	0.077	0	9
UQCRB	0	2.01233	0.751	0.05	0	9
PHPT1	0	1.32787	0.744	0.06	0	9
ATP5PO	0	1.65357	0.742	0.051	0	9
YBX1	0	1.83603	0.742	0.054	0	9
FKBP4	0	2.16243	0.74	0.028	0	9
NDUFA3	0	1.3526	0.74	0.052	0	9
EDF1	0	1.27125	0.738	0.055	0	9
COPS9	0	1.35197	0.736	0.052	0	9
DES	0	1.57097	0.736	0.06	0	9
EEF1B2	0	1.47301	0.734	0.047	0	9
PFDN5	0	1.4396	0.734	0.044	0	9
PRDX5	0	1.27368	0.727	0.065	0	9
RPL17	0	1.57707	0.725	0.044	0	9
ATP2A2	0	1.65068	0.723	0.05	0	9
COL1A2	0	2.21004	0.721	0.092	0	9
COL4A2	0	1.27831	0.717	0.051	0	9
NACA	0	1.94813	0.715	0.05	0	9
TOMM7	0	1.47944	0.715	0.045	0	9
SLC25A3	0	1.60283	0.709	0.052	0	9
SOD1	0	1.50116	0.709	0.043	0	9
HIGD2A	0	1.17895	0.706	0.045	0	9
SMPX	0	1.8595	0.706	0.05	0	9
HSP90B1	0	1.80053	0.704	0.042	0	9
FITM1	0	1.29265	0.702	0.053	0	9
MYH6	0	1.36352	0.702	0.088	0	9
MYOZ2	0	1.53524	0.702	0.041	0	9
COL4A1	0	1.39391	0.7	0.045	0	9
NDUFB11	0	1.28732	0.698	0.056	0	9
ACTA1	0	1.6869	0.696	0.041	0	9
MDH2	0	1.18448	0.696	0.051	0	9
MYL12A	0	1.79394	0.696	0.038	0	9
NEBL	0	1.62758	0.694	0.052	0	9
PPP1R1A	0	1.48806	0.69	0.042	0	9
COMMD6	0	1.51605	0.688	0.038	0	9
NDUFA6	0	1.30649	0.688	0.041	0	9
PFKP	0	1.48718	0.688	0.049	0	9
CYCS	0	1.65858	0.686	0.049	0	9
EIF3K	0	1.24911	0.683	0.041	0	9
STIP1	0	1.49132	0.683	0.031	0	9
ATP5PD	0	1.34726	0.681	0.038	0	9
MICOS10	0	1.37937	0.679	0.041	0	9
POPDC2	0	1.19394	0.679	0.06	0	9
SNX3	0	1.56707	0.679	0.036	0	9
CD99	0	1.35775	0.677	0.045	0	9
LDB3	0	1.35419	0.677	0.053	0	9
ATP6V1F	0	1.48016	0.675	0.036	0	9
GSTP1	0	1.14622	0.675	0.053	0	9
SORBS2	0	1.63887	0.675	0.047	0	9
BEX3	0	1.36826	0.673	0.045	0	9
NAP1L1	0	1.27876	0.673	0.076	0	9
PTGES3	0	1.98672	0.673	0.03	0	9
STMN1	0	1.39908	0.671	0.055	0	9
TPM2	0	1.23833	0.671	0.046	0	9
CACYBP	0	1.84602	0.667	0.024	0	9
GPX4	0	1.19704	0.667	0.057	0	9
MTCH1	0	1.35463	0.667	0.036	0	9
ATP5IF1	0	1.48895	0.665	0.044	0	9
MYOM1	0	1.49555	0.665	0.038	0	9
SNTA1	0	1.14933	0.665	0.054	0	9
PDLIM5	0	1.36039	0.66	0.044	0	9
BTF3	0	1.33702	0.656	0.036	0	9
TGM2	0	1.19991	0.656	0.046	0	9
TMEM258	0	1.24359	0.656	0.036	0	9
COX6A2	0	1.27999	0.654	0.039	0	9
PPDPF	0	1.35388	0.654	0.04	0	9
RBX1	0	1.14228	0.654	0.038	0	9
SNU13	0	1.23301	0.654	0.039	0	9
HSPB2	0	1.16846	0.652	0.05	0	9
TMSB4X	0	1.52947	0.652	0.062	0	9
AKR1B1	0	1.17066	0.65	0.047	0	9
MRPL41	0	1.05523	0.65	0.056	0	9
TUBA1A	0	1.0697	0.65	0.046	0	9
CALM2	0	1.23501	0.648	0.046	0	9
NDUFA2	0	1.01972	0.648	0.042	0	9
ACTG1	0	1.34941	0.646	0.035	0	9
BSG	0	1.03361	0.646	0.047	0	9
EIF1B	0	1.324	0.646	0.039	0	9
NDUFB4	0	1.1272	0.646	0.038	0	9
ZFAND2A	0	1.53888	0.646	0.01	0	9
CCT4	0	1.50368	0.644	0.034	0	9
NDUFB8	0	1.07584	0.644	0.041	0	9
MZT2B	0	1.08183	0.642	0.048	0	9
CLU	0	1.40207	0.639	0.032	0	9
IGFBP2	0	1.20229	0.639	0.044	0	9
HNRNPA1	0	1.24003	0.637	0.042	0	9
EEF1D	0	1.23088	0.635	0.043	0	9
CALM3	0	1.17076	0.633	0.037	0	9
S100A4	0	0.997795	0.633	0.037	0	9
SEC61G	0	1.2606	0.633	0.032	0	9
SPTBN1	0	1.22236	0.633	0.039	0	9
SKP1	0	1.45485	0.631	0.043	0	9
TCAP	0	1.29278	0.631	0.046	0	9
PRKAR1A	0	1.30177	0.627	0.036	0	9
ROMO1	0	1.20113	0.627	0.042	0	9
SNRPD2	0	1.02488	0.627	0.042	0	9
B2M	0	1.25636	0.625	0.037	0	9
NDUFB7	0	1.03835	0.623	0.054	0	9
ATP5F1D	0	1.04163	0.621	0.052	0	9
RPL36AL	0	1.2446	0.621	0.036	0	9
CCN1	0	1.46595	0.618	0.015	0	9
HSBP1	0	1.33139	0.618	0.035	0	9
SLC25A5	0	1.14307	0.618	0.042	0	9
HMGB1	4.48587e-208	0.861333	0.616	0.127	6.91003e-204	9
PCBP1	0	1.16357	0.616	0.033	0	9
GPI	0	1.2203	0.614	0.049	0	9
GPX1	0	1.07354	0.614	0.051	0	9
MT-ND5	0	1.19806	0.614	0.04	0	9
PRDX1	0	1.23091	0.614	0.037	0	9
ACTB	0	1.07006	0.612	0.063	0	9
SSR4	0	1.025	0.612	0.047	0	9
UQCRC1	0	0.948741	0.612	0.051	0	9
FXYD6	0	0.940115	0.61	0.041	0	9
PPP2R1A	0	0.891772	0.61	0.038	0	9
EIF4G2	0	1.19485	0.606	0.035	0	9
HK1	0	0.955525	0.606	0.041	0	9
NUDC	0	1.25522	0.604	0.024	0	9
TLE5	0	1.14453	0.604	0.047	0	9
MAGED2	2.34454e-115	0.69179	0.602	0.193	3.61154e-111	9
NDUFAB1	0	1.13183	0.602	0.035	0	9
NOP10	0	0.954007	0.602	0.031	0	9
PARK7	0	1.01201	0.602	0.036	0	9
PSAP	0	1.04147	0.602	0.039	0	9
BNIP3	0	1.33184	0.6	0.031	0	9
CALR	0	0.96327	0.6	0.042	0	9
HSPA4	0	1.2079	0.6	0.019	0	9
NDUFB3	0	1.21489	0.6	0.035	0	9
NDUFB9	0	1.1312	0.6	0.041	0	9
HNRNPA2B1	0	1.51503	0.597	0.039	0	9
ANAPC11	0	0.95738	0.595	0.042	0	9
HMGN2	0	1.14173	0.595	0.037	0	9
NDUFS8	0	0.912705	0.595	0.041	0	9
PDLIM1	0	1.30935	0.595	0.045	0	9
CUTA	0	0.903666	0.593	0.042	0	9
P4HB	0	0.966511	0.593	0.047	0	9
YWHAZ	0	1.134	0.593	0.04	0	9
HSPB8	0	1.10931	0.591	0.024	0	9
NPM1	0	1.10599	0.591	0.034	0	9
RAN	0	1.09854	0.591	0.034	0	9
VDAC2	0	1.11611	0.591	0.037	0	9
ARF1	0	0.963331	0.587	0.034	0	9
DEDD2	0	1.16841	0.587	0.014	0	9
IER5	0	1.11606	0.587	0.01	0	9
NDUFA12	0	1.12505	0.587	0.034	0	9
NDUFB10	0	0.985323	0.587	0.036	0	9
RTL8C	0	1.01028	0.587	0.041	0	9
BANF1	0	1.05366	0.583	0.033	0	9
FN1	0	1.37067	0.583	0.025	0	9
NEDD8	0	1.07389	0.583	0.036	0	9
AP2M1	0	0.946504	0.581	0.04	0	9
ITGB1	0	1.1286	0.581	0.035	0	9
RTN4	0	1.01571	0.581	0.035	0	9
SQSTM1	0	1.12181	0.581	0.028	0	9
HNRNPK	0	1.1159	0.579	0.038	0	9
UQCRFS1	0	0.971597	0.579	0.037	0	9
VDAC1	0	1.02707	0.579	0.028	0	9
YWHAE	0	0.961305	0.577	0.034	0	9
PRDX6	0	1.01	0.574	0.037	0	9
ACO2	0	0.969775	0.572	0.035	0	9
ATP5F1C	0	0.911859	0.572	0.031	0	9
ST13	0	1.19228	0.572	0.022	0	9
TIMP1	0	1.29294	0.572	0.028	0	9
RRAD	0	0.941688	0.57	0.033	0	9
EIF4A2	0	1.1113	0.568	0.035	0	9
MASP1	0	1.08078	0.568	0.037	0	9
NDUFC1	0	1.0332	0.568	0.032	0	9
PLD3	0	0.922846	0.568	0.045	0	9
RANGAP1	0	0.959811	0.566	0.018	0	9
RBM24	5.08559e-232	0.921023	0.566	0.098	7.83384e-228	9
TRIR	0	0.917908	0.566	0.037	0	9
UGP2	0	1.25397	0.566	0.033	0	9
SLIRP	0	0.965164	0.564	0.029	0	9
SSR3	0	1.12289	0.564	0.031	0	9
FSTL1	0	0.991806	0.562	0.035	0	9
NDUFB6	0	0.866702	0.562	0.029	0	9
PPP1R14B	0	0.812979	0.562	0.037	0	9
PTTG1IP	0	0.859832	0.562	0.033	0	9
RPS4Y1	0	0.921431	0.56	0.031	0	9
TXNL4A	0	0.873082	0.56	0.03	0	9
ITM2B	0	0.960915	0.558	0.034	0	9
TRMT112	0	0.901064	0.558	0.029	0	9
YWHAQ	0	1.04988	0.558	0.033	0	9
BRI3	0	0.959297	0.556	0.028	0	9
FIS1	0	0.869915	0.556	0.038	0	9
HNRNPC	0	0.966296	0.556	0.032	0	9
PPP1R14C	0	1.03602	0.556	0.031	0	9
CCT3	0	0.963834	0.553	0.031	0	9
ECH1	0	0.841843	0.553	0.035	0	9
LAMTOR5	0	1.0094	0.553	0.031	0	9
MRPL33	0	0.900767	0.553	0.029	0	9
ATF4	0	1.03226	0.551	0.023	0	9
CKB	0	0.901126	0.551	0.047	0	9
MORF4L1	0	0.951348	0.551	0.035	0	9
NDUFS7	0	0.79727	0.551	0.042	0	9
PHB	0	0.85021	0.551	0.035	0	9
DSTN	0	1.00553	0.549	0.032	0	9
HSPG2	0	0.889691	0.549	0.042	0	9
CDC42EP3	0	1.03566	0.547	0.02	0	9
TIMM8B	0	0.828824	0.547	0.044	0	9
PCBP2	0	1.03116	0.545	0.033	0	9
PDE4DIP	0	0.962915	0.545	0.028	0	9
PET100	0	0.763524	0.545	0.033	0	9
SMYD1	0	0.929265	0.545	0.035	0	9
VCAN	0	0.855042	0.545	0.035	0	9
COL5A1	0	1.15968	0.543	0.029	0	9
MFGE8	0	0.846417	0.543	0.032	0	9
RHOC	0	0.810867	0.543	0.046	0	9
RPS27L	0	0.995927	0.543	0.031	0	9
TUFM	0	0.840392	0.543	0.036	0	9
UBE2D3	0	0.981629	0.543	0.022	0	9
ALPK2	0	0.951566	0.541	0.031	0	9
APLP2	0	0.940605	0.541	0.038	0	9
COX14	0	0.892175	0.541	0.031	0	9
BVES	0	0.933493	0.539	0.03	0	9
NDUFC2	0	0.939838	0.539	0.033	0	9
PALLD	0	0.922436	0.539	0.029	0	9
PPP1CB	0	0.893599	0.539	0.035	0	9
RHOQ	0	0.928923	0.539	0.035	0	9
SERBP1	0	0.932614	0.539	0.031	0	9
ANXA6	0	0.803674	0.537	0.044	0	9
BLOC1S1	0	0.79578	0.537	0.035	0	9
DNAJB4	0	0.991742	0.537	0.013	0	9
MYL12B	0	0.979069	0.537	0.029	0	9
ATP5PB	0	0.885294	0.535	0.031	0	9
EIF3F	0	0.792539	0.535	0.029	0	9
PABPC1	1.51602e-124	0.629601	0.535	0.143	2.33527e-120	9
CKS2	0	0.883728	0.532	0.023	0	9
EIF3L	0	0.83626	0.532	0.029	0	9
GUK1	0	0.79115	0.532	0.036	0	9
LAMB2	0	0.815425	0.532	0.04	0	9
PTMA	0	0.921656	0.532	0.045	0	9
A2M	0	0.89423	0.53	0.032	0	9
ATF3	0	1.05702	0.53	0.011	0	9
COL6A1	0	1.13278	0.53	0.025	0	9
CST3	0	0.952086	0.53	0.033	0	9
EZR	0	0.840404	0.53	0.037	0	9
PCBD1	0	0.955192	0.53	0.03	0	9
CIAO2B	0	0.752041	0.528	0.033	0	9
HSPB3	0	0.88261	0.528	0.027	0	9
NDUFV1	0	0.764681	0.528	0.04	0	9
PDIA6	0	0.930968	0.528	0.027	0	9
PSMB6	0	0.79983	0.528	0.035	0	9
TBCA	0	0.858157	0.528	0.026	0	9
DBI	0	0.838037	0.526	0.027	0	9
PAM	0	1.01193	0.526	0.027	0	9
BZW2	0	0.899634	0.524	0.029	0	9
C19orf53	0	0.772086	0.524	0.037	0	9
HIGD1A	0	0.899423	0.524	0.032	0	9
MB	0	0.873327	0.524	0.035	0	9
CALU	0	0.858065	0.522	0.028	0	9
COX17	0	0.980824	0.522	0.029	0	9
CYB5R3	0	0.711123	0.522	0.032	0	9
DUSP5	0	0.916032	0.522	0.012	0	9
MRPL18	0	1.0539	0.522	0.012	0	9
NUDT4	0	0.894238	0.522	0.034	0	9
CSDE1	0	0.771228	0.52	0.048	0	9
GPC1	0	0.734584	0.52	0.043	0	9
MRPS21	0	0.800143	0.52	0.031	0	9
NDUFV2	0	0.821358	0.52	0.033	0	9
NME4	0	0.851911	0.52	0.034	0	9
AURKAIP1	0	0.700538	0.518	0.036	0	9
GADD45G	0	0.888273	0.518	0.019	0	9
MRPS6	0	0.992334	0.518	0.02	0	9
NDUFAF8	0	0.800983	0.518	0.037	0	9
QKI	0	0.888631	0.518	0.03	0	9
S100A13	0	0.802946	0.518	0.034	0	9
TAGLN	0	0.752464	0.518	0.043	0	9
NUCB1	0	0.836495	0.516	0.023	0	9
SNRPG	0	0.801311	0.516	0.026	0	9
TCP1	0	1.1336	0.516	0.019	0	9
C4orf3	0	0.866991	0.514	0.028	0	9
CANX	0	0.831103	0.514	0.031	0	9
FBN2	0	1.03382	0.514	0.049	0	9
NEXN	0	0.98949	0.514	0.025	0	9
ADPRHL1	0	0.788051	0.512	0.036	0	9
GABARAPL2	0	0.94093	0.512	0.025	0	9
GTF2I	0	0.827967	0.512	0.03	0	9
NDUFAF3	0	0.692842	0.512	0.032	0	9
RBPMS	0	0.847023	0.512	0.03	0	9
UBE2H	0	0.856339	0.512	0.019	0	9
VEGFB	0	0.796909	0.512	0.033	0	9
CXCL12	0	0.902441	0.509	0.042	0	9
MACROH2A1	0	0.841002	0.509	0.036	0	9
PEA15	0	0.887355	0.509	0.024	0	9
TIMM13	0	0.761711	0.509	0.042	0	9
TUBB4B	0	0.709357	0.509	0.047	0	9
PLOD1	0	0.880298	0.507	0.027	0	9
ANAPC16	0	0.785081	0.505	0.029	0	9
BMP5	0	0.85429	0.505	0.03	0	9
SEPTIN2	0	0.758531	0.505	0.031	0	9
SPTAN1	0	0.789345	0.505	0.029	0	9
COL6A2	0	1.17249	0.503	0.02	0	9
MLLT11	0	0.92267	0.503	0.03	0	9
NDUFA8	0	0.787506	0.501	0.031	0	9
SLC38A2	0	0.90578	0.501	0.023	0	9
CTNNA1	0	0.776938	0.499	0.026	0	9
POMP	0	0.803348	0.499	0.027	0	9
DNAJB6	0	0.871956	0.497	0.015	0	9
AHSA1	0	0.886234	0.495	0.015	0	9
CYC1	0	0.690089	0.495	0.038	0	9
CAPNS1	0	0.726884	0.493	0.035	0	9
CDKN1A	0	0.832291	0.493	0.023	0	9
FXYD1	0	0.747746	0.493	0.027	0	9
SDHA	0	0.812487	0.493	0.03	0	9
SVIL	0	0.821987	0.493	0.034	0	9
UBE2S	0	0.68248	0.493	0.036	0	9
TAF10	0	0.720171	0.491	0.028	0	9
DMAC1	0	0.665626	0.488	0.03	0	9
ETFB	0	0.634239	0.488	0.041	0	9
SUB1	0	0.776045	0.488	0.026	0	9
TMOD1	0	0.754647	0.488	0.03	0	9
EIF5	0	0.925738	0.486	0.022	0	9
FLNA	0	0.803055	0.486	0.03	0	9
LAMA4	0	0.711499	0.486	0.033	0	9
PSMB5	0	0.71159	0.486	0.032	0	9
HADHA	0	0.669924	0.484	0.031	0	9
CFL2	0	0.890196	0.482	0.028	0	9
DCN	0	1.13047	0.482	0.011	0	9
DYNLT1	0	0.749701	0.482	0.026	0	9
AHCY	0	0.640758	0.478	0.029	0	9
CLTB	0	0.668213	0.478	0.03	0	9
NDUFB5	0	0.737172	0.478	0.025	0	9
HACD1	0	0.779135	0.476	0.025	0	9
PDHA1	0	0.812686	0.476	0.027	0	9
POLR2E	0	0.696838	0.476	0.031	0	9
PTOV1	0	0.652973	0.476	0.029	0	9
CIRBP	0	0.697875	0.474	0.032	0	9
PSMA7	0	0.667208	0.474	0.028	0	9
S100A6	0	0.775144	0.474	0.039	0	9
YWHAG	0	0.745278	0.474	0.031	0	9
ASAH1	0	0.805843	0.472	0.027	0	9
ATP2B4	0	0.897855	0.472	0.026	0	9
HNRNPU	3.06824e-201	0.741416	0.472	0.076	4.72631e-197	9
IFITM3	0	0.827213	0.472	0.029	0	9
MANF	0	0.777445	0.472	0.017	0	9
MICOS13	0	0.687806	0.472	0.04	0	9
NKX2-5	1.17795e-296	0.607799	0.472	0.046	1.81451e-292	9
PNKD	0	0.712032	0.472	0.035	0	9
PSMB3	0	0.646457	0.472	0.033	0	9
CDH2	3.3066e-195	0.743218	0.47	0.076	5.09349e-191	9
GHITM	0	0.748648	0.47	0.029	0	9
ABLIM1	0	0.783185	0.468	0.026	0	9
NPC2	0	0.728878	0.468	0.026	0	9
PSMB7	0	0.6384	0.468	0.026	0	9
S100A10	0	0.751762	0.468	0.024	0	9
XRCC6	0	0.641592	0.468	0.028	0	9
CMYA5	0	0.886205	0.465	0.022	0	9
H2AZ1	9.52426e-83	0.542028	0.465	0.148	1.46712e-78	9
IER3	0	0.793978	0.465	0.025	0	9
MCL1	0	0.741998	0.465	0.017	0	9
MMP15	8.91148e-272	0.620429	0.465	0.05	1.37272e-267	9
PAPOLA	2.60411e-95	0.60141	0.465	0.136	4.01137e-91	9
SMDT1	0	0.666482	0.465	0.024	0	9
ATP1B1	0	0.676133	0.463	0.028	0	9
HDLBP	0	0.686139	0.463	0.03	0	9
MORF4L2	0	0.824656	0.463	0.022	0	9
CCT7	0	0.661068	0.461	0.031	0	9
CDC42	1.67344e-216	0.642692	0.461	0.065	2.57777e-212	9
FABP5	0	0.705433	0.461	0.033	0	9
GJA1	0	0.743998	0.461	0.026	0	9
ILK	0	0.599211	0.461	0.03	0	9
PSMB1	0	0.678513	0.461	0.026	0	9
ARL6IP5	0	0.738606	0.459	0.028	0	9
CCT2	0	0.669026	0.459	0.022	0	9
NCAM1	0	0.749035	0.459	0.026	0	9
LUM	0	1.16129	0.457	0.013	0	9
MRFAP1	0	0.659831	0.457	0.028	0	9
LSM7	0	0.649516	0.455	0.031	0	9
YBX3	0	0.666915	0.455	0.022	0	9
CCNI	0	0.69415	0.453	0.023	0	9
PSMB4	0	0.627819	0.453	0.03	0	9
CCT5	0	0.742982	0.451	0.025	0	9
MOB4	0	0.766323	0.451	0.011	0	9
NES	2.66193e-288	0.598517	0.451	0.044	4.10044e-284	9
SAP18	0	0.727249	0.451	0.024	0	9
TGFBI	0	1.07505	0.451	0.012	0	9
CRABP2	0	0.602651	0.449	0.036	0	9
FHOD3	0	0.700719	0.449	0.023	0	9
HSPA9	0	0.69284	0.449	0.022	0	9
MAP1LC3B	0	0.709341	0.449	0.024	0	9
SARAF	0	0.8239	0.449	0.024	0	9
SEPTIN7	0	0.66325	0.449	0.026	0	9
UQCC2	0	0.632091	0.449	0.03	0	9
CAMK2D	0	0.732525	0.447	0.02	0	9
CCT8	0	0.729075	0.447	0.022	0	9
HNRNPDL	0	0.692298	0.447	0.033	0	9
PPP1R12B	0	0.693107	0.447	0.023	0	9
TCEAL9	0	0.872108	0.447	0.013	0	9
HNRNPH1	0	0.71366	0.444	0.023	0	9
KTN1	0	0.66213	0.444	0.028	0	9
LSM4	0	0.649821	0.444	0.031	0	9
ARL6IP4	0	0.618503	0.442	0.035	0	9
GADD45GIP1	0	0.549059	0.442	0.036	0	9
SELENOK	0	0.683146	0.442	0.021	0	9
VCP	0	0.641387	0.442	0.03	0	9
CNBP	0	0.749381	0.44	0.019	0	9
COPE	0	0.561095	0.44	0.03	0	9
OBSCN	0	0.656273	0.44	0.033	0	9
TRIOBP	0	0.592167	0.44	0.029	0	9
AP2S1	0	0.654485	0.438	0.03	0	9
H2AZ2	0	0.612757	0.438	0.027	0	9
NAA38	0	0.618474	0.438	0.03	0	9
PDCD5	0	0.656924	0.438	0.028	0	9
FKBP3	0	0.687066	0.436	0.025	0	9
UQCRC2	0	0.622269	0.436	0.031	0	9
CCT6A	0	0.793487	0.434	0.021	0	9
JUND	0	0.762071	0.434	0.038	0	9
RTRAF	0	0.675376	0.434	0.023	0	9
CLIC4	0	0.616555	0.432	0.024	0	9
JTB	0	0.607354	0.432	0.019	0	9
SUMO2	0	0.627897	0.432	0.02	0	9
TMEM256	0	0.577839	0.432	0.025	0	9
ACADVL	0	0.612286	0.43	0.03	0	9
GADD45A	0	0.786934	0.43	0.007	0	9
MYH9	0	0.661866	0.43	0.023	0	9
C12orf57	0	0.597866	0.428	0.025	0	9
NDUFV3	0	0.601146	0.428	0.029	0	9
SLC8A1	0	0.61924	0.428	0.024	0	9
ZFAND5	0	0.751298	0.428	0.02	0	9
PRNP	0	0.710597	0.426	0.021	0	9
RAC1	0	0.605795	0.426	0.019	0	9
VAPA	0	0.611191	0.426	0.017	0	9
DYNLRB1	0	0.578788	0.423	0.023	0	9
HMGN3	0	0.674096	0.423	0.024	0	9
MRPL12	1.60678e-291	0.550161	0.423	0.038	2.47508e-287	9
TMBIM6	0	0.588582	0.423	0.024	0	9
TNNT1	0	0.654071	0.423	0.021	0	9
JUN	8.98036e-185	0.636777	0.421	0.063	1.38333e-180	9
PEBP1	0	0.60022	0.421	0.023	0	9
TECRL	0	0.577497	0.421	0.031	0	9
CD151	0	0.576287	0.419	0.032	0	9
CSRP2	0	0.648865	0.419	0.021	0	9
DPYSL3	0	0.573083	0.419	0.028	0	9
HBEGF	0	0.666872	0.419	0.011	0	9
ITGAV	0	0.723597	0.419	0.025	0	9
PHB2	0	0.539806	0.419	0.026	0	9
RPN2	0	0.625195	0.419	0.024	0	9
ETFA	0	0.608737	0.417	0.022	0	9
HSF1	0	0.57098	0.417	0.027	0	9
PSMD8	0	0.570862	0.417	0.03	0	9
SELENOH	0	0.533892	0.417	0.022	0	9
SF3B5	0	0.563874	0.417	0.029	0	9
SMS	0	0.642334	0.417	0.022	0	9
LTBP1	0	0.65284	0.415	0.024	0	9
TMEM141	5.49247e-305	0.547233	0.415	0.034	8.4606e-301	9
CTNNB1	0	0.581037	0.411	0.031	0	9
CHORDC1	0	0.660728	0.409	0.008	0	9
ECI1	0	0.531052	0.409	0.032	0	9
EIF3E	0	0.631527	0.409	0.025	0	9
MSRB2	0	0.570337	0.409	0.026	0	9
APP	0	0.631993	0.407	0.018	0	9
DNAJC15	0	0.553007	0.407	0.023	0	9
HMGN1	0	0.600233	0.407	0.025	0	9
MRPL51	0	0.566012	0.407	0.02	0	9
RABAC1	0	0.550593	0.407	0.03	0	9
RCAN1	0	0.645547	0.407	0.006	0	9
CSNK2B	0	0.569282	0.405	0.02	0	9
HSPA4L	0	0.675192	0.405	0.004	0	9
KDELR2	0	0.571917	0.405	0.022	0	9
MAP3K20	0	0.554864	0.405	0.022	0	9
MLF2	0	0.567182	0.405	0.022	0	9
PTMS	0	0.556876	0.405	0.026	0	9
RHOA	1.62993e-277	0.563377	0.405	0.037	2.51075e-273	9
TRIM55	0	0.638348	0.405	0.019	0	9
CLTC	7.0379e-151	0.517081	0.403	0.069	1.08412e-146	9
EID1	0	0.530942	0.403	0.026	0	9
RBM39	0	0.586501	0.403	0.024	0	9
SNRPC	0	0.559933	0.403	0.024	0	9
HADHB	0	0.618456	0.4	0.021	0	9
ACTA2	3.2425e-254	0.5562	0.398	0.039	4.99474e-250	9
BRK1	0	0.527646	0.398	0.022	0	9
POLR2F	0	0.515948	0.398	0.028	0	9
LAPTM4A	0	0.541463	0.396	0.017	0	9
PDLIM3	0	0.61371	0.396	0.02	0	9
PRDX3	0	0.570947	0.396	0.019	0	9
RNF115	0	0.64857	0.396	0.016	0	9
SNRPN	0	0.549763	0.396	0.024	0	9
CHCHD2	0	0.556909	0.394	0.019	0	9
EIF3H	0	0.549274	0.394	0.019	0	9
LIMS2	0	0.579015	0.394	0.028	0	9
UBE2B	0	0.622039	0.394	0.015	0	9
UBE2E3	5.01207e-27	0.271287	0.394	0.194	7.7206e-23	9
ARPC1A	0	0.607007	0.392	0.02	0	9
DDX17	0	0.573834	0.392	0.025	0	9
NONO	0	0.519437	0.392	0.022	0	9
NPTN	0	0.630904	0.392	0.023	0	9
ZNHIT1	0	0.524972	0.392	0.026	0	9
ADCY5	0	0.548573	0.39	0.026	0	9
CAP2	0	0.527387	0.39	0.018	0	9
GOT1	0	0.551543	0.39	0.025	0	9
ITGA7	0	0.585339	0.388	0.022	0	9
LMOD2	0	0.607773	0.388	0.024	0	9
MAGED1	0	0.560689	0.388	0.025	0	9
PPP1R15A	0	0.55256	0.388	0.011	0	9
SH3GLB1	0	0.560661	0.388	0.021	0	9
DKK3	0	0.601446	0.386	0.024	0	9
P4HA2	0	0.604935	0.386	0.009	0	9
RALY	0	0.501855	0.386	0.022	0	9
EIF5A	1.99133e-297	0.490709	0.384	0.029	3.06745e-293	9
FAM162A	0	0.650845	0.384	0.022	0	9
INHBA	1.82572e-104	0.525556	0.384	0.086	2.81234e-100	9
MAP4	0	0.540281	0.382	0.026	0	9
MYH7B	0	0.590413	0.382	0.018	0	9
SYNPO2L	0	0.529299	0.382	0.025	0	9
VMP1	0	0.566624	0.382	0.011	0	9
COX20	0	0.547665	0.379	0.017	0	9
CSNK1A1	0	0.532647	0.379	0.018	0	9
EIF4H	0	0.495898	0.379	0.022	0	9
GPBP1	0	0.609131	0.379	0.008	0	9
LMNA	2.09493e-266	0.495301	0.379	0.033	3.22703e-262	9
ALKBH7	1.05773e-304	0.507947	0.377	0.028	1.62933e-300	9
ANXA5	0	0.5209	0.377	0.013	0	9
CALD1	0	0.554613	0.377	0.015	0	9
CLIC1	2.06298e-307	0.488319	0.377	0.027	3.17781e-303	9
FUS	0	0.50014	0.377	0.027	0	9
GYG1	0	0.527775	0.377	0.023	0	9
MACF1	0	0.519717	0.377	0.023	0	9
PPIB	0	0.5862	0.377	0.024	0	9
RAB21	0	0.533965	0.377	0.013	0	9
SET	0	0.512654	0.377	0.023	0	9
ATP6V0B	2.44357e-298	0.488629	0.375	0.028	3.76407e-294	9
CAV1	0	0.515937	0.375	0.019	0	9
POLR2J	0	0.52356	0.375	0.023	0	9
WEE1	0	0.591447	0.375	0.015	0	9
ATP6V1G1	0	0.564811	0.373	0.017	0	9
IDH3A	0	0.507645	0.373	0.018	0	9
KRT10	0	0.518073	0.373	0.016	0	9
PTTG1	0	0.517903	0.373	0.022	0	9
ARPC2	0	0.522269	0.371	0.021	0	9
EMILIN2	2.14447e-294	0.516724	0.371	0.028	3.30334e-290	9
ITM2C	0	0.517918	0.371	0.023	0	9
PYGB	1.40721e-293	0.465672	0.371	0.028	2.16766e-289	9
SF3B6	0	0.52892	0.371	0.022	0	9
SRRM2	0	0.566511	0.371	0.023	0	9
FBN1	1.452e-18	0.274156	0.369	0.205	2.23666e-14	9
POLR2I	2.0764e-283	0.49938	0.369	0.029	3.19849e-279	9
CAMTA1	0	0.500363	0.367	0.023	0	9
MCRIP2	6.46928e-293	0.463969	0.367	0.027	9.96529e-289	9
MLF1	0	0.518445	0.367	0.014	0	9
SAMD4A	0	0.582754	0.367	0.01	0	9
SSR2	0	0.502074	0.367	0.022	0	9
TAF7	0	0.514371	0.367	0.011	0	9
TPM4	0	0.506046	0.367	0.018	0	9
CLK1	0	0.508373	0.365	0.012	0	9
CRIP1	0	0.511703	0.365	0.016	0	9
MRPL20	0	0.501713	0.365	0.024	0	9
MYLK3	0	0.514625	0.365	0.024	0	9
H3-3B	2.52465e-54	0.3839	0.363	0.122	3.88896e-50	9
LRPAP1	1.36985e-269	0.459257	0.363	0.029	2.11012e-265	9
NDUFA10	0	0.483891	0.363	0.02	0	9
PSMA1	0	0.492993	0.363	0.021	0	9
RBPMS2	0	0.494368	0.363	0.023	0	9
RHEB	0	0.496005	0.363	0.016	0	9
TIMM17B	1.16389e-281	0.484461	0.363	0.028	1.79285e-277	9
NDUFS3	0	0.467301	0.361	0.021	0	9
NID1	0	0.493778	0.361	0.01	0	9
NIPSNAP2	0	0.522405	0.361	0.022	0	9
SREBF2	0	0.469477	0.361	0.021	0	9
SUCLG1	0	0.463155	0.361	0.02	0	9
VDAC3	0	0.537914	0.361	0.024	0	9
CORIN	1.71446e-301	0.520779	0.358	0.025	2.64096e-297	9
EIF4B	0	0.489254	0.358	0.022	0	9
ELOC	7.82331e-265	0.490583	0.358	0.029	1.2051e-260	9
FXR1	0	0.558445	0.358	0.014	0	9
NT5DC2	0	0.464618	0.358	0.023	0	9
FUNDC2	0	0.455166	0.356	0.017	0	9
HEPH	0	0.500243	0.356	0.019	0	9
HMGA1	5.11794e-283	0.459847	0.356	0.026	7.88368e-279	9
NHP2	0	0.485871	0.356	0.022	0	9
MCRIP1	6.25897e-287	0.486434	0.354	0.026	9.64132e-283	9
MPRIP	0	0.465752	0.354	0.019	0	9
PFKM	1.62188e-301	0.490348	0.354	0.024	2.49834e-297	9
PTP4A3	8.01937e-294	0.461019	0.354	0.025	1.2353e-289	9
RBM38	1.58192e-256	0.462542	0.354	0.03	2.43679e-252	9
TPD52L2	0	0.480414	0.354	0.016	0	9
CALM1	9.78271e-157	0.466493	0.352	0.051	1.50693e-152	9
CCND2	3.86036e-284	0.524469	0.352	0.026	5.94649e-280	9
CKMT2	0	0.453417	0.352	0.02	0	9
GSTK1	0	0.478942	0.352	0.019	0	9
MAPKAPK2	0	0.463538	0.352	0.022	0	9
ATP13A3	0	0.509772	0.35	0.016	0	9
FHL1	0	0.521814	0.35	0.013	0	9
JMJD6	0	0.518635	0.35	0.008	0	9
MT-ND4L	0	0.528925	0.35	0.021	0	9
SLBP	0	0.578127	0.35	0.005	0	9
TMED9	0	0.444899	0.35	0.022	0	9
TXN	0	0.46306	0.35	0.02	0	9
CISD1	0	0.486322	0.348	0.018	0	9
CS	0	0.479724	0.348	0.02	0	9
DUT	0	0.455037	0.348	0.016	0	9
LAMB1	0	0.480108	0.348	0.019	0	9
MBOAT7	0	0.505137	0.348	0.004	0	9
TRIM28	1.56609e-262	0.451927	0.348	0.027	2.4124e-258	9
DAD1	0	0.482606	0.346	0.018	0	9
DMKN	0	0.469946	0.346	0.021	0	9
MPC2	0	0.451678	0.346	0.018	0	9
PRDX4	0	0.500388	0.346	0.014	0	9
RNF7	0	0.498453	0.346	0.017	0	9
SEM1	0	0.490972	0.346	0.02	0	9
HLA-C	6.5362e-282	0.468161	0.344	0.024	1.00684e-277	9
SLMAP	0	0.490594	0.344	0.013	0	9
SPAG7	0	0.489894	0.344	0.021	0	9
TEAD1	3.51276e-49	0.3328	0.344	0.118	5.41105e-45	9
CREB5	0	0.54845	0.342	0.012	0	9
PPP1CC	0	0.452961	0.342	0.019	0	9
PRMT1	6.26319e-267	0.451707	0.342	0.026	9.64782e-263	9
TXNDC17	8.99855e-284	0.468288	0.342	0.024	1.38614e-279	9
COPZ1	0	0.443774	0.34	0.019	0	9
DDX5	0	0.538993	0.34	0.02	0	9
DNAJB2	0	0.448138	0.34	0.017	0	9
FGF12	0	0.465332	0.34	0.011	0	9
SF3B1	0	0.468919	0.34	0.015	0	9
CTSB	0	0.455998	0.338	0.02	0	9
KRT19	2.04749e-216	0.55228	0.338	0.033	3.15395e-212	9
MRPL52	7.9255e-250	0.43879	0.338	0.027	1.22084e-245	9
PSMD2	1.43729e-298	0.439287	0.338	0.022	2.21401e-294	9
SMIM26	0	0.442112	0.338	0.015	0	9
NCKAP1	0	0.436836	0.335	0.018	0	9
PKP2	2.49745e-278	0.452614	0.335	0.023	3.84707e-274	9
PPIF	2.63949e-295	0.436221	0.335	0.021	4.06586e-291	9
SPON2	0	0.61699	0.335	0.011	0	9
TRIB1	0	0.48214	0.335	0.01	0	9
ALPK3	0	0.482606	0.333	0.016	0	9
CAVIN1	3.00438e-279	0.466151	0.333	0.023	4.62795e-275	9
CBX3	4.55829e-303	0.443888	0.333	0.02	7.0216e-299	9
OBSL1	2.39955e-252	0.448142	0.333	0.026	3.69627e-248	9
S100A11	0	0.524035	0.333	0.016	0	9
GNB2	4.4681e-297	0.437237	0.331	0.021	6.88267e-293	9
GRHPR	1.1655e-271	0.443624	0.331	0.023	1.79534e-267	9
LAMTOR1	4.91002e-298	0.426299	0.331	0.021	7.5634e-294	9
LAMTOR4	1.52522e-270	0.434946	0.331	0.024	2.34945e-266	9
SDHB	0	0.427608	0.331	0.014	0	9
ANXA2	0	0.45004	0.329	0.017	0	9
PMVK	0	0.452666	0.329	0.013	0	9
DUSP3	6.72448e-301	0.464306	0.327	0.02	1.03584e-296	9
FKBP1A	6.37364e-279	0.432501	0.327	0.022	9.81796e-275	9
GAS6	5.90159e-297	0.419825	0.327	0.02	9.0908e-293	9
MAP1B	8.24689e-245	0.42664	0.327	0.026	1.27035e-240	9
MAZ	1.39797e-284	0.417105	0.327	0.021	2.15343e-280	9
SUGT1	0	0.446769	0.327	0.011	0	9
C4orf48	3.22103e-250	0.435726	0.325	0.025	4.96167e-246	9
JPT1	2.28638e-263	0.405303	0.325	0.023	3.52194e-259	9
LSM3	0	0.43349	0.325	0.018	0	9
PFDN1	0	0.445195	0.325	0.015	0	9
SLC16A1	8.42616e-279	0.46573	0.325	0.022	1.29796e-274	9
STK39	0	0.440566	0.325	0.015	0	9
AK2	0	0.434774	0.323	0.018	0	9
ARF4	0	0.443908	0.323	0.016	0	9
C1orf122	9.23656e-264	0.404355	0.323	0.023	1.4228e-259	9
FLOT1	8.53402e-294	0.432464	0.323	0.02	1.31458e-289	9
NDUFA5	0	0.433618	0.323	0.018	0	9
UBE2D2	0	0.428053	0.323	0.018	0	9
CKAP4	4.5229e-71	0.358472	0.321	0.082	6.96708e-67	9
GNB1	0	0.424387	0.321	0.016	0	9
KCNH2	1.53363e-251	0.407575	0.321	0.024	2.36241e-247	9
LBH	1.9094e-223	0.42664	0.321	0.028	2.94123e-219	9
SERP1	0	0.426123	0.321	0.012	0	9
SFPQ	0	0.424902	0.321	0.016	0	9
TUSC3	0	0.418025	0.321	0.017	0	9
XBP1	0	0.435359	0.321	0.008	0	9
CHPF	1.62302e-253	0.426725	0.319	0.023	2.5001e-249	9
HNRNPA3	0	0.419794	0.319	0.015	0	9
MATN2	9.4039e-293	0.444272	0.319	0.019	1.44858e-288	9
NDUFA7	5.93276e-258	0.420653	0.319	0.023	9.13883e-254	9
RBIS	0	0.394687	0.319	0.017	0	9
CD164	1.21077e-306	0.407013	0.317	0.018	1.86508e-302	9
GTF3A	0	0.428382	0.317	0.014	0	9
MRPL57	1.68422e-266	0.403021	0.317	0.022	2.59438e-262	9
SRP9	7.45111e-307	0.400734	0.317	0.018	1.14777e-302	9
UBA1	7.38478e-290	0.417162	0.317	0.019	1.13755e-285	9
ALKBH5	0	0.412852	0.314	0.016	0	9
SLC3A2	0	0.43144	0.314	0.008	0	9
TMEM14C	1.73734e-291	0.435816	0.314	0.019	2.67619e-287	9
ALDOA	0	0.408171	0.312	0.016	0	9
CDK2AP2	0	0.438364	0.312	0.012	0	9
EIF3M	4.22084e-300	0.40822	0.312	0.018	6.50178e-296	9
EMC6	0	0.415895	0.312	0.015	0	9
NR4A1	0	0.450721	0.312	0.003	0	9
ATOX1	1.05418e-290	0.412295	0.31	0.018	1.62386e-286	9
EIF4A1	3.29411e-246	0.428403	0.31	0.023	5.07424e-242	9
LGALS3	0	0.413238	0.31	0.015	0	9
PIN1	1.55719e-239	0.406887	0.31	0.024	2.39869e-235	9
PMP22	9.33605e-287	0.392448	0.31	0.018	1.43812e-282	9
TOMM20	0	0.425651	0.31	0.014	0	9
BMT2	0	0.412983	0.308	0.007	0	9
CORO6	1.53567e-252	0.38792	0.308	0.022	2.36554e-248	9
DYNC1H1	9.8069e-307	0.395588	0.308	0.016	1.51065e-302	9
KHDRBS1	2.99316e-38	0.26044	0.308	0.112	4.61066e-34	9
LRRFIP1	0	0.42578	0.308	0.014	0	9
MZT2A	1.87807e-282	0.398361	0.308	0.019	2.89298e-278	9
PDK1	3.57956e-268	0.390654	0.308	0.02	5.51396e-264	9
RNPS1	1.87071e-278	0.395213	0.308	0.019	2.88164e-274	9
USP22	4.47062e-272	0.40265	0.308	0.02	6.88654e-268	9
ENAH	0	0.467226	0.306	0.008	0	9
IGFBP3	0	0.658632	0.306	0.011	0	9
MXRA7	5.71442e-216	0.43308	0.306	0.026	8.80249e-212	9
P4HA1	0	0.441736	0.306	0.006	0	9
PRKACA	1.03691e-252	0.388606	0.306	0.021	1.59726e-248	9
RND3	0	0.398548	0.306	0.003	0	9
SOD2	0	0.417311	0.306	0.015	0	9
CAPZB	7.26004e-282	0.4056	0.304	0.018	1.11834e-277	9
COL2A1	3.43801e-197	0.401249	0.304	0.028	5.29591e-193	9
PAIP2	0	0.419375	0.304	0.014	0	9
RTN3	0	0.400555	0.304	0.012	0	9
SNRNP70	3.8063e-244	0.392414	0.304	0.022	5.86322e-240	9
SNRPD3	2.13872e-300	0.383611	0.304	0.016	3.29449e-296	9
STARD7	7.73089e-272	0.398425	0.304	0.019	1.19087e-267	9
TYMS	7.55615e-281	0.405472	0.304	0.018	1.16395e-276	9
UXT	0	0.391967	0.304	0.015	0	9
VCL	7.43847e-292	0.421014	0.304	0.017	1.14582e-287	9
CAPN2	0	0.442501	0.302	0.014	0	9
CAV2	4.39075e-297	0.44698	0.302	0.016	6.76352e-293	9
EIF3G	1.57187e-259	0.388061	0.302	0.02	2.4213e-255	9
ERBB2	3.99104e-200	0.391715	0.302	0.028	6.1478e-196	9
GSN	2.21134e-287	0.371031	0.302	0.017	3.40635e-283	9
HERPUD1	0	0.451293	0.302	0.01	0	9
IVNS1ABP	0	0.450055	0.302	0.014	0	9
MBNL2	0	0.413764	0.302	0.006	0	9
PHLDA1	0	0.446537	0.302	0.007	0	9
PRELID1	8.61553e-277	0.384814	0.302	0.018	1.32714e-272	9
SCP2	2.34662e-291	0.418282	0.302	0.017	3.61473e-287	9
TSPAN13	0	0.415405	0.302	0.009	0	9
ADH5	5.48334e-289	0.409505	0.3	0.017	8.44654e-285	9
ANXA11	1.4084e-282	0.39127	0.3	0.017	2.1695e-278	9
CSTB	0	0.387219	0.3	0.015	0	9
DSP	4.32397e-263	0.375812	0.3	0.019	6.66064e-259	9
NUCKS1	4.85304e-238	0.430827	0.3	0.022	7.47562e-234	9
PPP1CA	3.79789e-265	0.378602	0.3	0.019	5.85027e-261	9
PSMC1	3.46238e-288	0.378153	0.3	0.017	5.33345e-284	9
TMEM59	0	0.400488	0.3	0.013	0	9
FBLN1	0	0.542206	0.298	0.011	0	9
HDGF	1.42429e-265	0.383146	0.298	0.019	2.19397e-261	9
KLHDC3	3.53545e-246	0.380584	0.298	0.021	5.446e-242	9
LAMTOR2	6.12098e-278	0.383571	0.298	0.017	9.42875e-274	9
MFN2	0	0.398357	0.298	0.013	0	9
NOP53	1.04372e-275	0.384856	0.298	0.018	1.60774e-271	9
SNRPE	4.81557e-281	0.380177	0.298	0.017	7.41791e-277	9
SSU72	7.43395e-269	0.408142	0.298	0.018	1.14512e-264	9
TRA2B	0	0.395826	0.298	0.011	0	9
APOE	1.5214e-162	0.39477	0.296	0.033	2.34356e-158	9
CCN2	0	0.425334	0.296	0.004	0	9
CDV3	0	0.379765	0.296	0.014	0	9
COPA	0	0.391534	0.296	0.011	0	9
FILIP1	6.05231e-297	0.389571	0.296	0.016	9.32297e-293	9
MRPL23	2.64043e-275	0.378667	0.296	0.017	4.06732e-271	9
PPP2CA	3.91382e-301	0.385929	0.296	0.015	6.02885e-297	9
VEGFA	0	0.440436	0.296	0.013	0	9
WDR1	1.1985e-233	0.386222	0.296	0.022	1.84617e-229	9
CPEB4	0	0.394719	0.294	0.01	0	9
DENND5A	3.46783e-291	0.39158	0.294	0.016	5.34185e-287	9
GTF2A2	0	0.420604	0.294	0.011	0	9
ISYNA1	3.27638e-258	0.396112	0.294	0.019	5.04694e-254	9
LAMA2	0	0.382221	0.294	0.012	0	9
NDUFS2	7.4393e-213	0.376338	0.294	0.024	1.14595e-208	9
NEK7	0	0.425522	0.294	0.014	0	9
PDIA3	3.04813e-295	0.413109	0.294	0.015	4.69535e-291	9
STRAP	9.76772e-302	0.394416	0.294	0.015	1.50462e-297	9
SUN1	0	0.40339	0.294	0.012	0	9
COL16A1	0	0.409394	0.291	0.011	0	9
EIF3I	4.01234e-279	0.369765	0.291	0.016	6.1806e-275	9
MTLN	1.35566e-258	0.403233	0.291	0.018	2.08826e-254	9
CDK2AP1	0	0.394215	0.289	0.013	0	9
HDAC5	1.29612e-266	0.366179	0.289	0.017	1.99655e-262	9
RAD23A	2.03764e-264	0.384342	0.289	0.018	3.13878e-260	9
SIPA1L2	2.52779e-253	0.378378	0.289	0.019	3.89381e-249	9
ATXN10	1.72027e-260	0.373684	0.287	0.018	2.6499e-256	9
MTFR1L	1.19717e-283	0.390989	0.287	0.016	1.84412e-279	9
NNT	2.09392e-273	0.390885	0.287	0.016	3.22547e-269	9
RBFOX2	0	0.385759	0.287	0.013	0	9
SLC4A3	1.75382e-250	0.3696	0.287	0.019	2.70158e-246	9
TMED10	9.46042e-287	0.396747	0.287	0.015	1.45728e-282	9
TSTD1	6.24571e-280	0.380727	0.287	0.016	9.62089e-276	9
YWHAB	1.8748e-259	0.360671	0.287	0.018	2.88794e-255	9
MTUS1	5.5391e-303	0.40647	0.285	0.014	8.53243e-299	9
PPIC	1.52156e-257	0.366179	0.285	0.018	2.34381e-253	9
SSBP1	1.06012e-282	0.374378	0.285	0.015	1.633e-278	9
TENT5A	0	0.390315	0.285	0.005	0	9
ARID5A	0	0.414635	0.283	0.005	0	9
BOLA3	5.15504e-298	0.38838	0.283	0.014	7.94083e-294	9
COA3	1.05746e-247	0.3599	0.283	0.018	1.62891e-243	9
MEF2A	2.36811e-270	0.375611	0.283	0.016	3.64783e-266	9
PLEKHJ1	3.13461e-186	0.350722	0.283	0.026	4.82856e-182	9
AOPEP	0	0.379514	0.281	0.008	0	9
C9orf16	1.25478e-233	0.377479	0.281	0.019	1.93286e-229	9
DLD	8.80029e-260	0.378539	0.281	0.017	1.3556e-255	9
ERGIC3	6.67786e-288	0.382183	0.281	0.014	1.02866e-283	9
PHLDB2	0	0.361079	0.281	0.01	0	9
SNRPB	1.72625e-266	0.361962	0.281	0.016	2.65911e-262	9
CYSTM1	0	0.363793	0.279	0.011	0	9
HIKESHI	0	0.379809	0.279	0.006	0	9
KIFAP3	1.45155e-283	0.371201	0.279	0.014	2.23597e-279	9
MKNK2	0	0.363429	0.279	0.007	0	9
MRPL21	2.03535e-303	0.357069	0.279	0.013	3.13525e-299	9
PDHB	2.44458e-253	0.348441	0.279	0.017	3.76562e-249	9
PSMD4	1.34248e-226	0.350778	0.279	0.02	2.06796e-222	9
RNF11	0	0.36958	0.279	0.011	0	9
ZFP36L1	1.11459e-280	0.391762	0.279	0.015	1.71691e-276	9
ASB2	1.62574e-183	0.375265	0.277	0.025	2.50429e-179	9
ASPH	1.48709e-238	0.394187	0.277	0.018	2.29071e-234	9
CCND1	3.05387e-236	0.351793	0.277	0.018	4.70417e-232	9
COL5A2	0	0.567587	0.277	0.009	0	9
DST	6.95936e-304	0.358103	0.277	0.013	1.07202e-299	9
DUSP1	0	0.404607	0.277	0.004	0	9
ERP29	2.21159e-248	0.361827	0.277	0.017	3.40673e-244	9
MAPRE1	4.19351e-289	0.367237	0.277	0.014	6.45968e-285	9
MRPL34	3.36363e-238	0.357077	0.277	0.018	5.18134e-234	9
RAB1A	4.41698e-280	0.37133	0.277	0.014	6.80392e-276	9
TMEM14B	3.24879e-270	0.378185	0.277	0.015	5.00444e-266	9
ATP6V1E1	1.72822e-280	0.352804	0.275	0.014	2.66215e-276	9
CNN2	0	0.392312	0.275	0.01	0	9
COX7A2L	1.33985e-297	0.355645	0.275	0.013	2.06391e-293	9
HNRNPM	1.95213e-275	0.360553	0.275	0.014	3.00706e-271	9
MGAT4B	1.05478e-269	0.359006	0.275	0.015	1.62478e-265	9
MRPS36	1.93844e-264	0.353715	0.275	0.015	2.98597e-260	9
MYL6B	5.07652e-244	0.337367	0.275	0.017	7.81988e-240	9
COA4	1.59034e-241	0.345707	0.273	0.017	2.44976e-237	9
PGM1	4.73512e-276	0.364411	0.273	0.014	7.29398e-272	9
RYR2	0	0.371631	0.273	0.012	0	9
SEC61B	4.67118e-295	0.396999	0.273	0.013	7.19549e-291	9
SEPTIN9	3.93952e-216	0.336409	0.273	0.02	6.06844e-212	9
SLC2A1	1.77895e-283	0.381537	0.273	0.014	2.7403e-279	9
TRAK1	2.77047e-263	0.367094	0.273	0.015	4.26763e-259	9
XPO4	1.74248e-209	0.369673	0.273	0.021	2.68411e-205	9
ZNF330	0	0.413847	0.273	0.01	0	9
C1QBP	1.68294e-224	0.364381	0.27	0.019	2.5924e-220	9
CCNG1	1.37339e-270	0.355649	0.27	0.014	2.11557e-266	9
COPS6	1.38039e-260	0.344506	0.27	0.015	2.12635e-256	9
MAP2K2	9.12193e-225	0.362335	0.27	0.019	1.40514e-220	9
PPID	0	0.378994	0.27	0.009	0	9
PSMC3	3.03424e-192	0.338428	0.27	0.023	4.67395e-188	9
PSMC5	7.38188e-212	0.33939	0.27	0.02	1.13711e-207	9
RNF10	0	0.351741	0.27	0.011	0	9
BCAR1	3.3859e-259	0.35087	0.268	0.015	5.21564e-255	9
COL6A3	0	0.504258	0.268	0.006	0	9
EIF5B	0	0.374951	0.268	0.005	0	9
MEST	0	0.438483	0.268	0.008	0	9
OCIAD1	3.29774e-249	0.36016	0.268	0.016	5.07983e-245	9
PPP2CB	0	0.359268	0.268	0.011	0	9
PSME2	4.94631e-249	0.355911	0.268	0.016	7.61929e-245	9
SEC11A	6.06738e-281	0.361199	0.268	0.013	9.34619e-277	9
EPS15	2.09207e-287	0.376599	0.266	0.012	3.22263e-283	9
GRSF1	5.86624e-288	0.346421	0.266	0.012	9.03635e-284	9
IL6ST	0	0.360958	0.266	0.008	0	9
ILF3	4.60566e-270	0.34644	0.266	0.014	7.09456e-266	9
PALM2AKAP2	2.61135e-249	0.35087	0.266	0.016	4.02253e-245	9
PMEPA1	0	0.37828	0.266	0.006	0	9
PPP2R5C	1.11253e-253	0.361581	0.266	0.015	1.71375e-249	9
RAB7A	1.75996e-284	0.344332	0.266	0.013	2.71104e-280	9
RPS19BP1	2.48493e-225	0.339616	0.266	0.018	3.82779e-221	9
ANXA1	0	0.451081	0.264	0.005	0	9
APOBEC2	5.5011e-234	0.336724	0.264	0.017	8.47389e-230	9
CDC37	5.32531e-256	0.341619	0.264	0.015	8.20311e-252	9
ELOVL5	0	0.362786	0.264	0.005	0	9
NCL	3.10456e-230	0.335696	0.264	0.017	4.78226e-226	9
NFE2L1	2.15383e-224	0.347157	0.264	0.018	3.31775e-220	9
RHOBTB3	1.50846e-263	0.359779	0.264	0.014	2.32364e-259	9
TMEM259	5.73448e-220	0.350766	0.264	0.018	8.83339e-216	9
ADD1	3.19428e-199	0.3324	0.262	0.02	4.92047e-195	9
ARHGAP1	1.84782e-200	0.344978	0.262	0.02	2.84637e-196	9
CD59	0	0.359916	0.262	0.01	0	9
EIF2S2	1.33977e-219	0.351536	0.262	0.018	2.06378e-215	9
HRC	2.04912e-214	0.332445	0.262	0.018	3.15646e-210	9
MYZAP	3.28534e-223	0.336665	0.262	0.017	5.06074e-219	9
PLXNB2	2.71304e-220	0.351536	0.262	0.018	4.17917e-216	9
TSPAN9	1.68196e-210	0.356948	0.262	0.019	2.59089e-206	9
VPS28	8.30376e-175	0.33159	0.262	0.024	1.27911e-170	9
ATP6V0E1	3.62856e-235	0.347765	0.26	0.016	5.58944e-231	9
CPNE1	9.04571e-267	0.341722	0.26	0.013	1.3934e-262	9
KLF6	1.743e-106	0.339274	0.26	0.04	2.68491e-102	9
PTP4A2	1.89599e-269	0.330597	0.26	0.013	2.92058e-265	9
RAB2A	9.49457e-275	0.330552	0.26	0.013	1.46254e-270	9
TSC22D1	5.34931e-166	0.331549	0.26	0.025	8.24008e-162	9
AZIN1	3.88972e-277	0.330811	0.258	0.012	5.99172e-273	9
B4GALNT3	9.54808e-242	0.344506	0.258	0.015	1.47079e-237	9
C12orf75	2.08747e-260	0.332706	0.258	0.013	3.21554e-256	9
C1orf43	1.22123e-293	0.349786	0.258	0.011	1.88119e-289	9
GABARAP	8.14376e-214	0.327987	0.258	0.018	1.25446e-209	9
GDI2	1.5974e-235	0.351386	0.258	0.016	2.46064e-231	9
NENF	8.87347e-279	0.345237	0.258	0.012	1.36687e-274	9
PFDN2	8.77913e-302	0.338527	0.258	0.01	1.35234e-297	9
PRPF8	7.49235e-235	0.325776	0.258	0.016	1.15412e-230	9
PSMB2	3.02791e-237	0.346846	0.258	0.015	4.6642e-233	9
RBMX	1.02575e-243	0.340201	0.258	0.015	1.58007e-239	9
AEBP1	0	0.360049	0.256	0.009	0	9
DDB1	4.50756e-209	0.336117	0.256	0.018	6.94345e-205	9
GYPC	8.1984e-215	0.324285	0.256	0.017	1.26288e-210	9
JPH2	2.17264e-203	0.327395	0.256	0.019	3.34674e-199	9
NAV1	7.44891e-218	0.345213	0.256	0.017	1.14743e-213	9
RBP1	5.83025e-187	0.348856	0.256	0.021	8.98092e-183	9
SLC25A11	2.3303e-184	0.320623	0.256	0.021	3.58959e-180	9
SRSF3	7.26393e-181	0.327111	0.256	0.022	1.11894e-176	9
SYMPK	2.33416e-243	0.342677	0.256	0.015	3.59554e-239	9
ADI1	1.81638e-252	0.319349	0.254	0.013	2.79795e-248	9
GTF3C6	4.61651e-226	0.325828	0.254	0.016	7.11127e-222	9
NME1	2.53043e-222	0.34023	0.254	0.016	3.89788e-218	9
RAMP1	2.55941e-287	0.340501	0.254	0.011	3.94252e-283	9
RCAN2	0	0.328209	0.254	0.009	0	9
SLC25A23	2.14816e-265	0.34211	0.254	0.012	3.30903e-261	9
ECHS1	3.83378e-211	0.333473	0.252	0.017	5.90555e-207	9
EIF2S3	1.29033e-260	0.328307	0.252	0.013	1.98762e-256	9
HSPB6	2.49136e-286	0.353952	0.252	0.011	3.8377e-282	9
IST1	5.20608e-280	0.358362	0.252	0.011	8.01944e-276	9
LAMC1	5.97371e-225	0.333046	0.252	0.016	9.2019e-221	9
SDF4	1.33357e-202	0.323514	0.252	0.018	2.05423e-198	9
BCAP31	5.85974e-199	0.327216	0.249	0.018	9.02634e-195	9
CDC34	6.93998e-190	0.311952	0.249	0.019	1.06903e-185	9
COA1	9.07145e-230	0.322699	0.249	0.015	1.39737e-225	9
FH	9.86524e-224	0.311725	0.249	0.015	1.51964e-219	9
GRN	3.18057e-209	0.3383	0.249	0.017	4.89935e-205	9
HNRNPH3	2.83808e-269	0.338818	0.249	0.012	4.37178e-265	9
ILF2	7.06159e-193	0.306578	0.249	0.019	1.08777e-188	9
TACC2	5.02412e-219	0.328067	0.249	0.016	7.73916e-215	9
LONP1	2.14221e-209	0.321469	0.247	0.017	3.29985e-205	9
LRIG1	2.37049e-253	0.325023	0.247	0.013	3.6515e-249	9
QARS1	7.44597e-213	0.337625	0.247	0.016	1.14698e-208	9
SIVA1	2.22637e-210	0.324745	0.247	0.017	3.4295e-206	9
SLIT3	1.02783e-219	0.333175	0.247	0.016	1.58327e-215	9
TMEM167A	2.3664e-260	0.318768	0.247	0.012	3.6452e-256	9
CDK16	7.67814e-198	0.309744	0.245	0.018	1.18274e-193	9
EIF4G1	7.25029e-174	0.30337	0.245	0.021	1.11683e-169	9
EMC10	3.64459e-181	0.339932	0.245	0.02	5.61413e-177	9
FAM189A2	5.25396e-250	0.343427	0.245	0.013	8.0932e-246	9
IGFBP5	5.09982e-173	0.341753	0.245	0.021	7.85576e-169	9
MMADHC	1.73363e-269	0.332235	0.245	0.011	2.67048e-265	9
OSTC	8.36651e-210	0.32237	0.245	0.016	1.28878e-205	9
PSMA4	1.97517e-197	0.323771	0.245	0.018	3.04255e-193	9
PSME1	2.15878e-208	0.318832	0.245	0.016	3.32538e-204	9
SEC61A1	2.54579e-201	0.311415	0.245	0.017	3.92153e-197	9
SURF4	1.18302e-247	0.31851	0.245	0.013	1.82232e-243	9
TSPAN3	1.4167e-199	0.317289	0.245	0.017	2.18228e-195	9
ARPC3	5.89019e-242	0.32926	0.243	0.013	9.07325e-238	9
FAAP20	6.75475e-187	0.300715	0.243	0.018	1.0405e-182	9
IFI27L2	1.55069e-204	0.30688	0.243	0.016	2.38868e-200	9
KPNB1	6.28072e-200	0.301906	0.243	0.017	9.67482e-196	9
SCARB2	0	0.326549	0.243	0.008	0	9
TRAPPC1	1.48427e-203	0.304091	0.243	0.017	2.28637e-199	9
BAG6	3.62227e-221	0.312886	0.241	0.014	5.57975e-217	9
EEF1G	6.40552e-249	0.333311	0.241	0.012	9.86706e-245	9
FBH1	1.19112e-192	0.30923	0.241	0.017	1.8348e-188	9
GBA2	1.29792e-214	0.314378	0.241	0.015	1.99932e-210	9
MYDGF	3.4553e-218	0.318897	0.241	0.015	5.32255e-214	9
NAA10	2.00648e-199	0.312188	0.241	0.017	3.09079e-195	9
PIN4	2.18467e-267	0.321617	0.241	0.011	3.36526e-263	9
PKIG	1.04294e-213	0.31412	0.241	0.015	1.60654e-209	9
RNF181	1.91893e-191	0.312134	0.241	0.018	2.95591e-187	9
TMEM50A	1.5456e-206	0.352813	0.241	0.016	2.38084e-202	9
WNK1	8.06684e-243	0.311056	0.241	0.013	1.24262e-238	9
ADGRB2	2.19535e-153	0.292941	0.239	0.023	3.38172e-149	9
C11orf58	1.24211e-240	0.316245	0.239	0.012	1.91334e-236	9
DDOST	1.76272e-203	0.310437	0.239	0.016	2.71529e-199	9
FAM50A	1.28669e-222	0.308472	0.239	0.014	1.98201e-218	9
FREM2	6.98766e-207	0.312574	0.239	0.016	1.07638e-202	9
IGF1R	7.78329e-259	0.330378	0.239	0.011	1.19894e-254	9
MRPL15	2.03918e-203	0.305765	0.239	0.016	3.14115e-199	9
MYOCD	7.38898e-229	0.332835	0.239	0.013	1.1382e-224	9
RAB11A	4.045e-232	0.317993	0.239	0.013	6.23092e-228	9
SCAND1	3.47476e-171	0.302217	0.239	0.02	5.35252e-167	9
AHNAK	1.29574e-216	0.306582	0.237	0.014	1.99596e-212	9
ERH	5.01563e-222	0.310746	0.237	0.014	7.72607e-218	9
HCFC1R1	5.13395e-236	0.304729	0.237	0.013	7.90834e-232	9
ITGB1BP2	1.19014e-173	0.315175	0.237	0.019	1.83329e-169	9
JUP	1.5207e-178	0.321331	0.237	0.019	2.34249e-174	9
KIF1B	6.17712e-260	0.314032	0.237	0.011	9.51523e-256	9
LMO7	1.23431e-231	0.310409	0.237	0.013	1.90134e-227	9
RPL22L1	3.06956e-152	0.29733	0.237	0.022	4.72835e-148	9
SMYD2	6.20518e-202	0.309793	0.237	0.016	9.55847e-198	9
SYNGR2	1.4194e-192	0.322814	0.237	0.017	2.18644e-188	9
ZYX	6.58482e-229	0.325023	0.237	0.013	1.01433e-224	9
BUD31	2.66132e-238	0.319157	0.235	0.012	4.0995e-234	9
CBX5	1.12943e-195	0.293692	0.235	0.016	1.73978e-191	9
CMC2	4.49518e-254	0.326005	0.235	0.011	6.92437e-250	9
HIF3A	4.47148e-224	0.321349	0.235	0.013	6.88786e-220	9
IMMT	1.05799e-180	0.291613	0.235	0.018	1.62972e-176	9
PCMT1	2.62645e-224	0.317347	0.235	0.013	4.04579e-220	9
REEP5	5.05942e-195	0.31645	0.235	0.016	7.79353e-191	9
RRAGD	3.4723e-239	0.313846	0.235	0.012	5.34873e-235	9
RSRC2	3.28687e-294	0.33189	0.235	0.008	5.06309e-290	9
SAT1	1.21096e-295	0.329247	0.235	0.008	1.86536e-291	9
STMP1	1.92112e-261	0.305289	0.235	0.01	2.9593e-257	9
STOML2	8.83406e-210	0.301499	0.235	0.015	1.3608e-205	9
TRIM26	0	0.3109	0.235	0.002	0	9
CELF1	1.56432e-80	0.281982	0.233	0.041	2.40968e-76	9
EIF4EBP1	1.51491e-163	0.293368	0.233	0.02	2.33356e-159	9
LMAN2L	0	0.30194	0.233	0.007	0	9
OAZ2	2.79012e-230	0.306885	0.233	0.012	4.2979e-226	9
PPP4C	2.25372e-211	0.316313	0.233	0.014	3.47163e-207	9
RRAS	1.49303e-242	0.294019	0.233	0.011	2.29987e-238	9
C1orf198	0	0.309623	0.231	0.006	0	9
CAPZA2	6.85439e-206	0.309972	0.231	0.014	1.05585e-201	9
MRPS7	2.1048e-179	0.295059	0.231	0.017	3.24223e-175	9
NAP1L4	1.28069e-169	0.283691	0.231	0.019	1.97277e-165	9
POLR1D	1.01544e-228	0.294513	0.231	0.012	1.56419e-224	9
RBM8A	2.88003e-177	0.28344	0.231	0.018	4.4364e-173	9
SSH2	6.12467e-114	0.267862	0.231	0.029	9.43444e-110	9
UFC1	4.19643e-228	0.305247	0.231	0.012	6.46419e-224	9
AAMDC	7.42709e-242	0.304771	0.229	0.011	1.14407e-237	9
CTNNAL1	0	0.313275	0.229	0.003	0	9
FARP1	7.1221e-212	0.290269	0.229	0.013	1.09709e-207	9
NARS1	5.3256e-211	0.292704	0.229	0.014	8.20356e-207	9
NOP56	1.231e-282	0.323245	0.229	0.008	1.89624e-278	9
PLEKHO1	1.23556e-226	0.311444	0.229	0.012	1.90325e-222	9
POPDC3	1.75901e-268	0.302645	0.229	0.009	2.70959e-264	9
SERPINE1	0	0.340196	0.229	0.002	0	9
SNRPF	6.07163e-218	0.293479	0.229	0.013	9.35274e-214	9
STUB1	3.52415e-208	0.307956	0.229	0.014	5.4286e-204	9
GAMT	1.86204e-129	0.274862	0.226	0.024	2.86828e-125	9
NDUFS4	1.52507e-247	0.287597	0.226	0.01	2.34922e-243	9
RBM20	5.35496e-263	0.308745	0.226	0.009	8.24879e-259	9
XRCC5	2.87043e-194	0.297403	0.226	0.015	4.4216e-190	9
ZNF428	7.69371e-213	0.300759	0.226	0.013	1.18514e-208	9
CASQ1	3.71364e-220	0.316633	0.224	0.012	5.72049e-216	9
DCTN3	2.80273e-208	0.283456	0.224	0.013	4.31732e-204	9
GLRX5	3.21322e-216	0.284102	0.224	0.012	4.94964e-212	9
GOT2	4.53769e-199	0.292187	0.224	0.014	6.98986e-195	9
IDH3B	1.05068e-168	0.271846	0.224	0.018	1.61846e-164	9
JAM3	0	0.311318	0.224	0.005	0	9
MPC1	1.72668e-228	0.29376	0.224	0.011	2.65978e-224	9
PDAP1	1.66637e-183	0.283703	0.224	0.016	2.56687e-179	9
RCN1	1.13851e-294	0.333839	0.224	0.007	1.75376e-290	9
SRSF11	1.89354e-138	0.279718	0.224	0.022	2.9168e-134	9
WBP2	4.59654e-223	0.302699	0.224	0.012	7.08051e-219	9
ARMCX3	1.74571e-258	0.302645	0.222	0.009	2.68909e-254	9
CHCHD1	6.32289e-188	0.282806	0.222	0.015	9.73978e-184	9
LMCD1	0	0.310666	0.222	0.005	0	9
LSM1	2.12755e-232	0.314032	0.222	0.011	3.27728e-228	9
MGP	9.39198e-293	0.503938	0.222	0.007	1.44674e-288	9
BAMBI	1.43272e-194	0.298822	0.22	0.014	2.20696e-190	9
CARHSP1	1.02459e-212	0.28951	0.22	0.012	1.57828e-208	9
GOLGA8A	1.03489e-269	0.311082	0.22	0.008	1.59415e-265	9
HIPK3	3.87369e-215	0.299759	0.22	0.012	5.96702e-211	9
HMGA2	4.61035e-232	0.304253	0.22	0.011	7.10179e-228	9
HNRNPAB	8.12539e-165	0.275082	0.22	0.017	1.25163e-160	9
MGAT5	1.48694e-226	0.316046	0.22	0.011	2.29048e-222	9
NDFIP1	3.70381e-194	0.279326	0.22	0.014	5.70535e-190	9
PPP1R16A	1.53726e-156	0.27856	0.22	0.018	2.368e-152	9
SAE1	4.1839e-184	0.285378	0.22	0.015	6.44488e-180	9
SF1	8.5473e-167	0.286646	0.22	0.017	1.31663e-162	9
SSB	7.18042e-213	0.290027	0.22	0.012	1.10607e-208	9
TSC22D2	3.67968e-293	0.29794	0.22	0.007	5.66818e-289	9
WNK2	3.5411e-226	0.301182	0.22	0.011	5.45472e-222	9
CACNA1C	8.50041e-199	0.295781	0.218	0.013	1.3094e-194	9
CLTA	9.01524e-194	0.282165	0.218	0.014	1.38871e-189	9
DCTN2	2.14196e-183	0.284991	0.218	0.015	3.29948e-179	9
DECR1	2.12356e-181	0.297532	0.218	0.015	3.27113e-177	9
DNPH1	1.67936e-205	0.287455	0.218	0.013	2.58688e-201	9
FKBP10	1.16184e-226	0.324007	0.218	0.011	1.7897e-222	9
METTL26	4.87711e-178	0.285378	0.218	0.015	7.5127e-174	9
NDUFS1	1.59627e-179	0.282935	0.218	0.015	2.4589e-175	9
RAPGEF1	3.93145e-206	0.279324	0.218	0.012	6.05601e-202	9
SDCBP	6.88554e-224	0.294278	0.218	0.011	1.06065e-219	9
SERINC1	9.52011e-207	0.299759	0.218	0.012	1.46648e-202	9
TBC1D4	1.30499e-300	0.304375	0.218	0.006	2.01021e-296	9
TIMMDC1	1.89357e-237	0.301088	0.218	0.01	2.91685e-233	9
AKAP6	1.49712e-269	0.301643	0.216	0.008	2.30616e-265	9
MRPL27	9.81322e-140	0.284703	0.216	0.02	1.51163e-135	9
MRPS25	2.55407e-171	0.282677	0.216	0.016	3.93429e-167	9
PICALM	7.53787e-217	0.288231	0.216	0.011	1.16113e-212	9
SLC25A39	4.19365e-199	0.273754	0.216	0.013	6.45989e-195	9
SSBP4	1.78698e-186	0.28872	0.216	0.014	2.75266e-182	9
STAU1	1.42877e-216	0.276341	0.216	0.011	2.20087e-212	9
TAX1BP3	3.23746e-158	0.268872	0.216	0.017	4.98698e-154	9
TCEA3	1.49034e-180	0.288204	0.216	0.015	2.29572e-176	9
ADCY6	3.57961e-192	0.278937	0.214	0.013	5.51403e-188	9
APBB1	3.04055e-156	0.278815	0.214	0.017	4.68366e-152	9
CTSD	7.37123e-143	0.25996	0.214	0.019	1.13546e-138	9
ENY2	2.95437e-176	0.28023	0.214	0.015	4.55092e-172	9
GADD45B	0	0.290894	0.214	0.004	0	9
ISOC2	7.91722e-175	0.279328	0.214	0.015	1.21957e-170	9
LMAN2	7.07202e-172	0.275709	0.214	0.015	1.08937e-167	9
OXA1L	9.99767e-175	0.270528	0.214	0.015	1.54004e-170	9
UBE2M	9.85649e-169	0.267157	0.214	0.016	1.51829e-164	9
UROD	3.13041e-170	0.274549	0.214	0.016	4.82208e-166	9
ACTN4	3.0119e-235	0.281915	0.212	0.009	4.63953e-231	9
CEBPD	5.95352e-279	0.306415	0.212	0.007	9.17081e-275	9
ENGASE	0	0.299175	0.212	0.003	0	9
ITGB1BP1	6.45419e-217	0.287985	0.212	0.011	9.94204e-213	9
MAP7D1	3.59724e-144	0.260439	0.212	0.019	5.54119e-140	9
PERP	8.30713e-164	0.281002	0.212	0.016	1.27963e-159	9
PGRMC2	8.09398e-186	0.278552	0.212	0.013	1.2468e-181	9
PLP2	2.10226e-213	0.275557	0.212	0.011	3.23831e-209	9
POLD2	1.57687e-194	0.270106	0.212	0.013	2.42901e-190	9
SNF8	2.50862e-197	0.270106	0.212	0.012	3.86428e-193	9
SPCS2	7.55178e-188	0.273367	0.212	0.013	1.16328e-183	9
SRM	3.58093e-196	0.264761	0.212	0.012	5.51607e-192	9
UBR4	1.5213e-197	0.27777	0.212	0.012	2.34341e-193	9
DDIT3	1.06027e-301	0.288546	0.21	0.006	1.63325e-297	9
DGKD	8.50892e-306	0.2981	0.21	0.005	1.31071e-301	9
EFEMP2	1.77507e-214	0.285534	0.21	0.011	2.73431e-210	9
MAP4K4	7.91908e-232	0.292248	0.21	0.009	1.21985e-227	9
MITF	9.21262e-261	0.27528	0.21	0.008	1.41911e-256	9
PCNP	2.12836e-221	0.282689	0.21	0.01	3.27853e-217	9
POLE4	5.01257e-184	0.283198	0.21	0.013	7.72136e-180	9
TIMP3	1.66066e-152	0.264454	0.21	0.017	2.55808e-148	9
USF2	4.01622e-164	0.257242	0.21	0.016	6.18658e-160	9
ARL2	2.39219e-159	0.262079	0.208	0.016	3.68493e-155	9
CHMP2A	1.63593e-209	0.279452	0.208	0.011	2.51999e-205	9
IMMP1L	3.96483e-213	0.270996	0.208	0.01	6.10743e-209	9
KIDINS220	3.2642e-213	0.273473	0.208	0.01	5.02818e-209	9
NR2F6	1.18747e-149	0.277654	0.208	0.017	1.82918e-145	9
PPP1R12C	3.85996e-204	0.267478	0.208	0.011	5.94589e-200	9
SEC13	4.1132e-218	0.285923	0.208	0.01	6.33597e-214	9
TBCB	1.48458e-182	0.273884	0.208	0.013	2.28685e-178	9
CERS6	5.17827e-287	0.297709	0.205	0.006	7.9766e-283	9
GAB1	8.1272e-261	0.27502	0.205	0.007	1.25191e-256	9
KLHDC8B	1.9268e-134	0.253684	0.205	0.019	2.96804e-130	9
OTUB1	3.53321e-159	0.263912	0.205	0.015	5.44255e-155	9
PDIA4	4.21321e-213	0.266549	0.205	0.01	6.49003e-209	9
SPEG	2.65372e-147	0.253381	0.205	0.017	4.08779e-143	9
TRAPPC2L	1.76932e-178	0.266208	0.205	0.013	2.72546e-174	9
CAPRIN1	4.97175e-158	0.258531	0.203	0.015	7.65849e-154	9
CCDC124	4.30975e-163	0.260887	0.203	0.015	6.63874e-159	9
CNN3	3.94127e-205	0.275427	0.203	0.011	6.07114e-201	9
COX7A1	1.47816e-158	0.302107	0.203	0.015	2.27696e-154	9
CYB5A	3.17557e-200	0.261338	0.203	0.011	4.89165e-196	9
DHX9	8.68769e-222	0.262863	0.203	0.009	1.33825e-217	9
EPN1	2.89691e-171	0.25914	0.203	0.014	4.4624e-167	9
FRZB	0	0.377039	0.203	0.003	0	9
ITGA5	4.57682e-194	0.270494	0.203	0.011	7.05013e-190	9
NID2	4.40405e-146	0.255053	0.203	0.017	6.78399e-142	9
PPM1K	1.7023e-158	0.268595	0.203	0.015	2.62223e-154	9
RASGRP2	5.29781e-166	0.263368	0.203	0.014	8.16074e-162	9
TIMM17A	2.6585e-207	0.270737	0.203	0.01	4.09516e-203	9
UBE2L3	1.25363e-129	0.269679	0.203	0.019	1.93109e-125	9
AKAP13	2.93214e-140	0.270029	0.201	0.017	4.51666e-136	9
CTTN	3.44224e-208	0.26603	0.201	0.01	5.30242e-204	9
DDT	3.63199e-129	0.259191	0.201	0.019	5.59471e-125	9
DEK	3.85806e-173	0.268297	0.201	0.013	5.94296e-169	9
EIF4EBP2	1.35962e-177	0.267371	0.201	0.013	2.09435e-173	9
HNRNPF	4.6219e-182	0.260562	0.201	0.012	7.11958e-178	9
KDELR1	4.05565e-217	0.268106	0.201	0.009	6.24733e-213	9
OGDH	6.37696e-128	0.253427	0.201	0.019	9.82307e-124	9
PAFAH1B1	6.07129e-194	0.266831	0.201	0.011	9.35221e-190	9
CTDNEP1	3.64318e-199	0.271789	0.199	0.01	5.61195e-195	9
DARS1	7.72103e-278	0.262803	0.199	0.006	1.18935e-273	9
ESD	1.35038e-189	0.257641	0.199	0.011	2.08012e-185	9
H1-10	9.11476e-108	0.251985	0.199	0.023	1.40404e-103	9
HMGB2	1.27839e-144	0.260405	0.199	0.016	1.96923e-140	9
KIF1C	2.99576e-176	0.271932	0.199	0.013	4.61467e-172	9
PKIA	1.69143e-201	0.2638	0.199	0.01	2.60548e-197	9
PSMD3	1.23692e-182	0.254232	0.199	0.012	1.90535e-178	9
STK25	2.57468e-152	0.255912	0.199	0.015	3.96604e-148	9
TMEM147	4.0514e-164	0.257719	0.199	0.014	6.24078e-160	9
ZNF358	3.10281e-208	0.259197	0.199	0.01	4.77957e-204	9
ADIPOR1	4.13024e-206	0.257472	0.197	0.01	6.36222e-202	9
BMP7	4.6554e-202	0.250639	0.197	0.01	7.17118e-198	9
LGALS3BP	4.39131e-163	0.275443	0.197	0.014	6.76438e-159	9
MLIP	1.67348e-194	0.262374	0.197	0.011	2.57782e-190	9
MRAS	1.10143e-209	0.262214	0.197	0.009	1.69664e-205	9
ACAA2	6.17658e-188	0.255009	0.195	0.011	9.5144e-184	9
ACTN1	8.40103e-182	0.256476	0.195	0.011	1.29409e-177	9
ANK2	8.17852e-218	0.266785	0.195	0.009	1.25982e-213	9
AP1S2	4.18765e-177	0.256217	0.195	0.012	6.45066e-173	9
ARPP19	1.63511e-177	0.271789	0.195	0.012	2.51872e-173	9
BAG1	5.35297e-191	0.254491	0.195	0.011	8.24571e-187	9
CYFIP2	7.95306e-186	0.271271	0.195	0.011	1.22509e-181	9
MFAP2	3.21286e-266	0.335791	0.195	0.006	4.94909e-262	9
SAR1A	7.51211e-209	0.284375	0.195	0.009	1.15717e-204	9
SUMO1	1.20948e-196	0.258159	0.195	0.01	1.86308e-192	9
TRIM54	2.08749e-153	0.25316	0.195	0.014	3.21557e-149	9
TSR3	4.77258e-182	0.266831	0.195	0.011	7.35169e-178	9
ABTB2	4.99061e-247	0.254357	0.193	0.007	7.68754e-243	9
IGF2BP2	1.75178e-232	0.26007	0.193	0.007	2.69845e-228	9
MFAP4	9.3823e-266	0.317009	0.193	0.006	1.44525e-261	9
NSA2	3.13307e-206	0.255485	0.193	0.009	4.82618e-202	9
TMEM230	8.22717e-187	0.264864	0.193	0.011	1.26731e-182	9
YARS1	3.38354e-211	0.255744	0.193	0.009	5.212e-207	9
SDHD	2.0972e-201	0.252974	0.191	0.009	3.23053e-197	9
UBQLN1	1.61835e-236	0.254097	0.191	0.007	2.4929e-232	9
HTRA3	3.20956e-223	0.264811	0.189	0.007	4.94401e-219	9
PA2G4	1.40516e-155	0.251387	0.189	0.013	2.16451e-151	9
ATP2C1	4.76519e-299	0.266323	0.187	0.004	7.3403e-295	9
COL21A1	9.97353e-300	0.269348	0.184	0.004	1.53632e-295	9
INPP5A	1.69738e-174	0.253539	0.184	0.011	2.61465e-170	9
KLHL24	7.77967e-184	0.256046	0.184	0.01	1.19838e-179	9
MAPRE2	1.45779e-264	0.252179	0.184	0.005	2.24559e-260	9
SRSF10	2.37128e-216	0.251187	0.182	0.007	3.65273e-212	9
TMEM263	1.26481e-225	0.254357	0.182	0.007	1.94831e-221	9
SERPINF1	1.49921e-197	0.291099	0.18	0.008	2.30938e-193	9
IFRD1	7.0887e-291	0.253354	0.178	0.003	1.09194e-286	9
ACP1	1.67501e-160	0.253539	0.176	0.011	2.58019e-156	9
SH3BGRL3	1.19078e-174	0.258808	0.176	0.009	1.83428e-170	9
TNC	1.28048e-217	0.313088	0.166	0.005	1.97246e-213	9
ELN	3.15139e-16	-0.509108	0.107	0.268	4.8544e-12	9
ACTC1	0	3.66212	1	0.209	0	10
MYH7	0	3.90496	1	0.247	0	10
MYL2	3.12241e-299	3.58164	1	0.262	4.80975e-295	10
MYL3	0	3.61935	1	0.209	0	10
MYL4	0	3.56588	1	0.197	0	10
MYL6	0	3.17968	1	0.182	0	10
MYL7	2.46632e-257	4.05924	1	0.375	3.79912e-253	10
RPL41	0	3.12697	1	0.179	0	10
TNNC1	0	3.48787	1	0.222	0	10
TNNI1	0	3.42749	1	0.198	0	10
TNNT2	0	3.56127	1	0.184	0	10
TPM1	7.10533e-308	3.59473	1	0.261	1.0945e-303	10
GAPDH	0	3.60351	0.997	0.206	0	10
HSPB1	0	2.14174	0.997	0.177	0	10
MT-CO2	0	3.57539	0.997	0.209	0	10
MT-CO3	0	3.44473	0.997	0.215	0	10
RPLP1	0	3.08877	0.997	0.182	0	10
SERF2	3.84012e-235	2.17967	0.997	0.374	5.91532e-231	10
MYL9	0	2.96573	0.994	0.141	0	10
RPL35	0	2.46277	0.994	0.131	0	10
RPL37A	0	2.86282	0.994	0.141	0	10
RPS19	0	2.68926	0.994	0.136	0	10
MT-CYB	0	2.92553	0.991	0.155	0	10
RPL10	0	2.77002	0.991	0.148	0	10
RPL13	0	2.79715	0.991	0.135	0	10
RPS15	0	2.66501	0.991	0.138	0	10
MYBPC3	0	2.91722	0.988	0.112	0	10
RPL29	0	2.64204	0.988	0.116	0	10
RPL36	0	2.50987	0.988	0.125	0	10
RPS2	0	2.80091	0.988	0.145	0	10
SELENOW	0	2.96968	0.988	0.127	0	10
TMSB10	0	2.82424	0.988	0.139	0	10
HSPB7	0	2.71023	0.985	0.114	0	10
MT-ND4	0	3.07381	0.985	0.186	0	10
RPL18A	0	2.51705	0.985	0.13	0	10
EEF1A1	0	3.15731	0.982	0.152	0	10
MDK	0	2.53016	0.979	0.12	0	10
MT-CO1	0	3.41046	0.979	0.169	0	10
RPL13A	0	2.43966	0.979	0.116	0	10
RPL8	0	2.76104	0.979	0.128	0	10
MT	0	3.08204	0.976	0.172	0	10
RPL28	0	2.61126	0.976	0.118	0	10
RPL32	0	2.79453	0.973	0.118	0	10
RPS28	0	2.70232	0.973	0.132	0	10
RPS14	0	2.56269	0.97	0.12	0	10
RPS18	0	2.4956	0.97	0.119	0	10
FTH1	0	2.76396	0.967	0.125	0	10
MT-ND3	0	2.8106	0.967	0.145	0	10
PKM	0	2.33308	0.967	0.091	0	10
RPS27	0	2.37886	0.967	0.129	0	10
RPS15A	0	2.6128	0.964	0.114	0	10
RPS21	0	2.21557	0.964	0.109	0	10
RPS29	0	2.39215	0.964	0.12	0	10
RPL18	0	2.38231	0.961	0.116	0	10
FAU	0	2.25265	0.958	0.107	0	10
TPT1	0	2.8088	0.958	0.116	0	10
RPL37	0	2.59935	0.955	0.116	0	10
RPS8	0	2.77691	0.955	0.106	0	10
TPI1	0	2.36876	0.955	0.098	0	10
UBB	0	1.86187	0.955	0.11	0	10
MYH6	0	2.84709	0.952	0.089	0	10
NPPA	0	3.08197	0.952	0.158	0	10
RPS12	0	2.5637	0.952	0.104	0	10
RPSA	0	2.19241	0.952	0.097	0	10
RPL12	0	2.52066	0.949	0.099	0	10
RPLP2	0	2.38212	0.949	0.116	0	10
RPS24	0	2.6805	0.949	0.094	0	10
UQCR11	0	2.34494	0.949	0.109	0	10
ATP5F1B	0	2.43426	0.946	0.092	0	10
CHCHD10	0	2.1542	0.946	0.084	0	10
RPL15	0	2.37028	0.946	0.105	0	10
RPL4	0	2.54429	0.946	0.094	0	10
RPS3A	0	2.61409	0.946	0.096	0	10
GNAS	0	2.52334	0.943	0.101	0	10
PRDX2	0	2.17562	0.943	0.083	0	10
RPL21	0	2.29654	0.943	0.095	0	10
RPS3	0	2.25762	0.94	0.095	0	10
ATP5ME	0	2.43989	0.937	0.103	0	10
CKM	0	2.10373	0.937	0.099	0	10
COX5B	0	2.1715	0.937	0.103	0	10
CSRP3	0	2.3185	0.937	0.099	0	10
RPL35A	0	2.38617	0.937	0.105	0	10
RPL7A	0	2.35537	0.937	0.106	0	10
COL18A1	0	2.15798	0.934	0.083	0	10
COX6B1	0	2.2476	0.934	0.094	0	10
COX7C	0	2.6562	0.934	0.093	0	10
EEF2	0	2.06372	0.934	0.078	0	10
RPL9	0	2.42297	0.934	0.097	0	10
TTN	0	2.43831	0.934	0.136	0	10
TUBB	0	1.94033	0.934	0.074	0	10
COX8A	0	2.06434	0.931	0.095	0	10
RPL19	0	2.36008	0.931	0.092	0	10
RPL27	0	2.18544	0.931	0.101	0	10
RPL30	0	2.39448	0.931	0.102	0	10
RPLP0	0	2.2743	0.931	0.093	0	10
RPS10	0	2.21252	0.931	0.09	0	10
RPS16	0	2.12201	0.931	0.097	0	10
RPS27A	0	2.62306	0.931	0.09	0	10
RPS7	0	2.35067	0.931	0.086	0	10
TUBA1B	0	2.19509	0.931	0.084	0	10
KRT8	0	2.03993	0.927	0.093	0	10
RPL24	0	2.28586	0.927	0.095	0	10
UBL5	0	1.85575	0.927	0.084	0	10
UQCR10	0	2.26934	0.927	0.087	0	10
ACTN2	0	2.27015	0.924	0.081	0	10
COX4I1	0	2.31422	0.924	0.09	0	10
CRYAB	0	2.09703	0.924	0.136	0	10
FLNC	0	1.66786	0.924	0.106	0	10
RPL3	0	2.2381	0.924	0.092	0	10
UQCRQ	0	2.26849	0.924	0.101	0	10
CRIP2	0	2.28916	0.921	0.083	0	10
ELOB	0	1.84573	0.921	0.086	0	10
ENO3	0	2.04687	0.921	0.083	0	10
RPL5	0	2.31947	0.921	0.08	0	10
RPS23	0	2.63379	0.921	0.103	0	10
RPS6	0	2.3107	0.921	0.082	0	10
MT-ND1	0	2.37017	0.918	0.101	0	10
RPL11	0	2.26773	0.918	0.116	0	10
RPL31	0	2.19794	0.915	0.09	0	10
RPL39	0	2.31844	0.915	0.108	0	10
LDHA	0	2.32934	0.912	0.086	0	10
NREP	0	2.84171	0.912	0.09	0	10
UBC	0	1.28319	0.912	0.125	0	10
PFN1	0	2.2068	0.909	0.076	0	10
NDUFA4	0	2.41256	0.906	0.092	0	10
RPL26	0	2.45483	0.906	0.081	0	10
RPL38	0	2.00663	0.906	0.087	0	10
RPS9	0	1.99411	0.906	0.093	0	10
ATP5MF	0	2.0698	0.903	0.086	0	10
COX7B	0	2.42447	0.903	0.086	0	10
NDUFB2	0	1.97695	0.903	0.085	0	10
RACK1	0	2.151	0.903	0.081	0	10
SRP14	0	2.50166	0.903	0.078	0	10
UBA52	0	2.08845	0.903	0.08	0	10
H3-3A	5.1542e-161	1.59224	0.9	0.364	7.93953e-157	10
PPIA	0	2.40292	0.9	0.081	0	10
UQCRH	0	2.33898	0.9	0.077	0	10
COX5A	0	2.29233	0.897	0.077	0	10
COX6C	0	2.4801	0.897	0.08	0	10
FABP3	0	2.3944	0.897	0.086	0	10
PLN	0	2.43791	0.897	0.088	0	10
POLR2L	0	1.98999	0.897	0.08	0	10
RPL34	0	2.43747	0.897	0.091	0	10
RPL7	0	2.09384	0.897	0.08	0	10
RPS5	0	2.09289	0.897	0.09	0	10
CFL1	0	1.86949	0.894	0.069	0	10
COX6A1	0	1.88479	0.894	0.074	0	10
RPL23A	0	2.08518	0.894	0.079	0	10
RPS25	0	2.14398	0.894	0.08	0	10
TNNI3	0	1.91906	0.894	0.086	0	10
ATP5F1A	0	2.10708	0.891	0.069	0	10
ATP5MC3	0	2.19587	0.891	0.075	0	10
MGST3	0	2.03775	0.891	0.076	0	10
RPL6	0	2.2691	0.891	0.083	0	10
RPS13	0	2.38321	0.891	0.086	0	10
ATP5MC1	0	1.69467	0.888	0.072	0	10
RPS11	0	1.82113	0.888	0.091	0	10
ATP5F1E	0	2.0679	0.885	0.073	0	10
IDH2	0	1.76117	0.885	0.065	0	10
NDUFA11	0	1.91359	0.885	0.081	0	10
RPS26	0	2.01802	0.885	0.07	0	10
RPS4X	0	2.2018	0.885	0.074	0	10
HSP90AA1	0	1.51591	0.882	0.12	0	10
MDH1	0	2.21637	0.879	0.072	0	10
PGAM1	0	1.98506	0.879	0.07	0	10
HSP90AB1	0	1.67159	0.876	0.079	0	10
NDUFB1	0	2.14162	0.876	0.071	0	10
NDUFS6	0	1.7764	0.876	0.073	0	10
VIM	0	1.92527	0.876	0.084	0	10
COX7A2	0	1.75659	0.873	0.072	0	10
LAPTM4B	0	2.195	0.87	0.068	0	10
LDHB	0	1.97955	0.87	0.068	0	10
NPPB	0	2.20505	0.87	0.113	0	10
RPL36A	0	2.16154	0.87	0.074	0	10
ATP5MD	0	2.04922	0.867	0.067	0	10
ATP5MG	0	2.09227	0.867	0.067	0	10
ATP5PF	0	2.17491	0.867	0.067	0	10
OST4	0	1.77085	0.867	0.075	0	10
POPDC2	0	1.93507	0.867	0.062	0	10
RPL10A	0	2.00385	0.867	0.072	0	10
NDUFS5	0	1.89926	0.864	0.07	0	10
SLC25A4	0	1.96856	0.864	0.068	0	10
HINT1	0	1.87121	0.861	0.068	0	10
MT-ND2	0	1.9923	0.861	0.084	0	10
NDUFA13	0	1.73536	0.861	0.082	0	10
OAZ1	0	1.64233	0.861	0.071	0	10
RPL23	0	1.75164	0.861	0.075	0	10
ATP5MPL	0	1.9437	0.858	0.066	0	10
EEF1A2	0	1.85445	0.855	0.072	0	10
KRT18	0	1.6669	0.855	0.074	0	10
ENO1	0	1.98583	0.852	0.08	0	10
PGK1	0	1.9172	0.852	0.064	0	10
ATP5MC2	0	1.81681	0.846	0.059	0	10
FITM1	0	1.54289	0.84	0.058	0	10
GNG5	0	1.83576	0.84	0.063	0	10
HSPA8	0	1.74267	0.84	0.103	0	10
RPL14	0	2.08119	0.84	0.065	0	10
SLC25A3	0	1.89318	0.84	0.057	0	10
SLC25A6	0	1.65021	0.84	0.063	0	10
ATP1A1	0	1.69467	0.837	0.054	0	10
GPX4	0	1.5007	0.837	0.06	0	10
PRDX5	0	1.53598	0.837	0.07	0	10
RPL27A	0	1.58563	0.837	0.071	0	10
ANKRD1	0	1.86673	0.834	0.104	0	10
LDB3	0	2.02437	0.834	0.056	0	10
NDUFB11	0	1.47585	0.834	0.06	0	10
SMPX	0	2.0132	0.834	0.055	0	10
TMA7	0	1.69341	0.834	0.057	0	10
CD63	0	1.65651	0.831	0.066	0	10
DES	0	1.63034	0.828	0.066	0	10
DYNLL1	0	1.70681	0.825	0.063	0	10
EIF1	0	1.75561	0.825	0.06	0	10
NDUFA1	0	2.02302	0.825	0.063	0	10
AKR1B1	0	1.74859	0.822	0.05	0	10
EDF1	0	1.47147	0.822	0.062	0	10
RPL22	0	1.90386	0.822	0.058	0	10
ATP5PO	0	1.86857	0.819	0.057	0	10
MMP15	0	1.60078	0.819	0.045	0	10
CYCS	0	1.77703	0.816	0.053	0	10
FHL2	0	2.04605	0.816	0.064	0	10
PHPT1	0	1.5794	0.816	0.067	0	10
RPS20	0	1.66726	0.816	0.07	0	10
CD81	0	1.46109	0.813	0.064	0	10
MRPL41	0	1.39157	0.813	0.059	0	10
SNTA1	0	1.43943	0.813	0.058	0	10
YBX1	0	1.72468	0.813	0.061	0	10
COPS9	0	1.42168	0.81	0.059	0	10
NACA	0	1.99352	0.81	0.056	0	10
EEF1B2	0	1.59497	0.807	0.053	0	10
FTL	0	1.84208	0.807	0.091	0	10
RTL8C	0	1.37994	0.807	0.041	0	10
PFKP	0	1.64435	0.804	0.054	0	10
UQCRB	0	2.07291	0.801	0.058	0	10
ATP5F1D	0	1.47908	0.798	0.054	0	10
CD99	0	1.42682	0.798	0.05	0	10
COL4A2	0	1.51246	0.798	0.057	0	10
NDUFA3	0	1.48363	0.798	0.059	0	10
SKP1	0	1.6695	0.798	0.045	0	10
UQCRC1	0	1.36655	0.798	0.053	0	10
MDH2	0	1.50537	0.795	0.056	0	10
NDUFB7	0	1.33366	0.795	0.057	0	10
NKX2-5	0	1.50901	0.795	0.042	0	10
STMN1	0	1.61675	0.795	0.06	0	10
ATP2A2	0	1.82378	0.792	0.057	0	10
BEX3	0	1.62006	0.792	0.049	0	10
CNN1	0	1.51287	0.792	0.061	0	10
GPI	0	1.55573	0.792	0.051	0	10
MIF	0	1.49957	0.792	0.07	0	10
CKB	0	1.45535	0.789	0.046	0	10
NEBL	0	1.78938	0.789	0.057	0	10
RPS17	0	1.58299	0.789	0.059	0	10
CALM2	0	1.4253	0.785	0.049	0	10
HSPE1	0	1.41855	0.785	0.06	0	10
RPL17	0	1.85263	0.785	0.051	0	10
SERPINH1	2.17449e-290	0.828085	0.785	0.107	3.34958e-286	10
GPX1	0	1.40008	0.782	0.054	0	10
IGFBP7	0	1.77171	0.782	0.06	0	10
MAGED2	4.5986e-173	1.01616	0.782	0.193	7.08369e-169	10
TGM2	0	1.6927	0.782	0.051	0	10
ATP5IF1	0	1.65143	0.779	0.049	0	10
TUBA1A	0	1.39058	0.779	0.05	0	10
MICOS10	0	1.59937	0.776	0.046	0	10
TPM2	0	1.53564	0.776	0.051	0	10
HIGD2A	0	1.33561	0.773	0.052	0	10
ROMO1	0	1.48375	0.773	0.045	0	10
HNRNPA1	0	1.50897	0.77	0.046	0	10
PDLIM5	0	1.57241	0.77	0.049	0	10
TOMM7	0	1.48036	0.77	0.052	0	10
TUBB4B	0	1.40614	0.77	0.045	0	10
HSPB2	0	1.40276	0.767	0.055	0	10
NDUFA6	0	1.47075	0.767	0.047	0	10
NDUFB9	0	1.42186	0.767	0.043	0	10
TLE5	0	1.40699	0.767	0.049	0	10
EIF1B	0	1.76101	0.764	0.044	0	10
GSTP1	0	1.45373	0.761	0.059	0	10
TNFRSF12A	0	1.32304	0.761	0.062	0	10
COL4A1	0	1.56226	0.758	0.051	0	10
SLC25A5	0	1.38986	0.758	0.045	0	10
PDLIM1	0	1.63806	0.755	0.048	0	10
UNC45B	0	1.16497	0.755	0.062	0	10
ATP5PD	0	1.49611	0.752	0.044	0	10
PPDPF	0	1.54591	0.752	0.045	0	10
SORBS2	0	1.59228	0.752	0.053	0	10
TIMM8B	0	1.17606	0.752	0.045	0	10
BSG	0	1.22621	0.749	0.052	0	10
EEF1D	0	1.42446	0.749	0.047	0	10
RBX1	0	1.30358	0.749	0.043	0	10
HNRNPK	0	1.28744	0.746	0.04	0	10
ANAPC11	0	1.21416	0.743	0.045	0	10
HK1	0	1.29509	0.743	0.044	0	10
NAP1L1	0	1.30136	0.743	0.081	0	10
PSAP	0	1.23613	0.743	0.042	0	10
SOD1	0	1.34472	0.743	0.05	0	10
FXYD6	0	1.24554	0.74	0.044	0	10
HSPA5	0	1.38251	0.74	0.059	0	10
NDUFAB1	0	1.33171	0.74	0.038	0	10
SPARC	0	1.22881	0.74	0.074	0	10
EIF3K	0	1.47261	0.737	0.048	0	10
PRDX1	0	1.26889	0.734	0.041	0	10
TCAP	0	1.53679	0.734	0.05	0	10
CUTA	0	1.07189	0.731	0.045	0	10
SNRPD2	0	1.1896	0.731	0.046	0	10
ANXA6	0	1.18272	0.728	0.045	0	10
GPC1	0	1.2569	0.728	0.043	0	10
UQCRFS1	0	1.29828	0.728	0.04	0	10
CALM3	0	1.23659	0.725	0.042	0	10
P4HB	0	1.16768	0.725	0.05	0	10
RAN	0	1.21173	0.725	0.037	0	10
SNU13	0	1.2752	0.725	0.045	0	10
YWHAZ	0	1.29962	0.725	0.044	0	10
MYOM1	0	1.30459	0.719	0.045	0	10
TRIR	0	1.12556	0.719	0.039	0	10
NES	0	1.30145	0.716	0.041	0	10
NPM1	0	1.311	0.716	0.037	0	10
PLD3	0	1.21162	0.716	0.047	0	10
ADPRHL1	0	1.20678	0.713	0.037	0	10
APLP2	0	1.25499	0.713	0.039	0	10
HMGB1	3.55548e-219	1.14677	0.713	0.13	5.47685e-215	10
MZT2B	0	1.22408	0.713	0.053	0	10
NDUFB8	0	1.21037	0.713	0.047	0	10
PPP1R1A	0	1.39357	0.713	0.05	0	10
PPP2R1A	0	1.15011	0.713	0.042	0	10
EZR	0	1.19765	0.71	0.038	0	10
MASP1	0	1.23343	0.71	0.039	0	10
NDUFA2	0	1.22961	0.71	0.048	0	10
NDUFB3	0	1.4189	0.71	0.039	0	10
PFDN5	0	1.34257	0.71	0.053	0	10
ACO2	0	1.15444	0.707	0.038	0	10
COMMD6	0	1.41673	0.707	0.046	0	10
CYC1	0	1.0316	0.707	0.038	0	10
NDUFS7	0	1.11315	0.707	0.044	0	10
AP2M1	0	1.29178	0.704	0.043	0	10
MYL12A	0	1.15839	0.704	0.046	0	10
NDUFA12	0	1.24837	0.704	0.038	0	10
NDUFB4	0	1.24576	0.704	0.044	0	10
NEDD8	0	1.28215	0.704	0.04	0	10
SMYD1	0	1.23131	0.704	0.037	0	10
VDAC2	0	1.22493	0.704	0.041	0	10
CALR	0	1.14141	0.701	0.047	0	10
EIF4G2	0	1.28797	0.701	0.039	0	10
HMGN2	0	1.30443	0.701	0.041	0	10
B2M	0	1.37961	0.698	0.042	0	10
CRABP2	0	1.27748	0.698	0.034	0	10
FABP5	0	1.34247	0.698	0.031	0	10
TIMM13	0	1.1475	0.698	0.043	0	10
FBN2	0	1.33967	0.695	0.05	0	10
MACROH2A1	0	1.02286	0.695	0.037	0	10
NDUFC2	0	1.18966	0.695	0.035	0	10
ARF1	0	1.12768	0.692	0.038	0	10
HSP90B1	0	1.30348	0.692	0.051	0	10
MYOZ2	0	1.24562	0.692	0.05	0	10
NDUFV2	0	1.14522	0.692	0.034	0	10
PARK7	0	1.15854	0.692	0.041	0	10
BTF3	0	1.36268	0.689	0.043	0	10
ETFB	0	1.02134	0.689	0.041	0	10
HNRNPA2B1	0	1.31699	0.689	0.043	0	10
HSPG2	0	1.21568	0.689	0.045	0	10
LAMB2	0	1.11376	0.689	0.042	0	10
PTMA	0	1.1418	0.689	0.047	0	10
SSR4	0	1.08519	0.689	0.052	0	10
NDUFS8	0	1.09209	0.686	0.046	0	10
RHOC	0	1.19735	0.686	0.048	0	10
SEC61G	0	1.31595	0.686	0.038	0	10
ACTA2	0	1.33484	0.683	0.035	0	10
C19orf53	0	1.02426	0.683	0.039	0	10
HIGD1A	0	1.14341	0.68	0.034	0	10
HSBP1	0	1.28754	0.68	0.041	0	10
HSPD1	0	0.867482	0.68	0.069	0	10
NUDT4	0	1.32421	0.68	0.035	0	10
RPL36AL	0	1.29213	0.68	0.042	0	10
TMSB4X	0	1.20768	0.68	0.069	0	10
CAPNS1	0	1.10087	0.677	0.036	0	10
CXCL12	0	1.22703	0.677	0.043	0	10
DSTN	0	1.14222	0.677	0.035	0	10
MICOS13	0	0.99946	0.677	0.04	0	10
MTCH1	0	1.07159	0.677	0.044	0	10
TMOD1	0	1.04019	0.677	0.03	0	10
ATP5F1C	0	1.16079	0.674	0.035	0	10
FSTL1	0	1.13105	0.674	0.038	0	10
NDUFAF8	0	1.07027	0.674	0.038	0	10
NDUFC1	0	1.22908	0.674	0.036	0	10
TMEM258	0	1.16396	0.674	0.043	0	10
PABPC1	3.3037e-161	0.822768	0.671	0.144	5.08903e-157	10
SPTBN1	0	1.22212	0.671	0.046	0	10
COX6A2	0	1.34679	0.668	0.046	0	10
MORF4L1	0	1.189	0.668	0.038	0	10
MRPL12	0	1.00622	0.668	0.036	0	10
PPP1CB	0	1.07787	0.668	0.038	0	10
RHOQ	0	1.23713	0.668	0.038	0	10
SVIL	0	1.11588	0.668	0.035	0	10
XIRP1	1.19821e-306	0.880535	0.668	0.072	1.84572e-302	10
GTF2I	0	1.11537	0.665	0.032	0	10
NDUFB10	0	1.14167	0.665	0.041	0	10
PRKAR1A	0	1.21926	0.665	0.042	0	10
RPS27L	0	1.31498	0.665	0.034	0	10
YWHAE	0	1.17583	0.665	0.039	0	10
DNAJA1	0	0.860482	0.662	0.063	0	10
ECH1	0	1.05866	0.662	0.039	0	10
ITM2B	0	1.19318	0.662	0.038	0	10
NDUFV1	0	1.0079	0.659	0.043	0	10
PSMB6	0	0.998512	0.659	0.037	0	10
RTN4	0	1.15524	0.659	0.039	0	10
LAMTOR5	0	1.07188	0.656	0.035	0	10
PRDX6	0	1.00711	0.656	0.041	0	10
ATP5PB	0	1.19625	0.653	0.035	0	10
MB	0	1.09836	0.653	0.038	0	10
NOP10	0	1.11657	0.653	0.037	0	10
PSMB3	0	0.876936	0.653	0.033	0	10
S100A4	0	0.996541	0.653	0.044	0	10
A2M	0	1.25268	0.65	0.035	0	10
COX14	0	1.01969	0.65	0.034	0	10
EIF4A2	0	1.1569	0.65	0.04	0	10
ITGB1	0	1.21617	0.65	0.04	0	10
PCBP1	0	1.05684	0.65	0.04	0	10
RPS4Y1	0	0.983297	0.65	0.035	0	10
SLIRP	0	1.08896	0.65	0.034	0	10
UQCRC2	0	1.03056	0.65	0.03	0	10
BNIP3	0	1.19966	0.647	0.037	0	10
IGFBP2	0	1.05543	0.647	0.051	0	10
TUFM	0	0.99567	0.647	0.039	0	10
VDAC1	0	1.14713	0.647	0.033	0	10
YWHAQ	0	1.02214	0.647	0.038	0	10
CIRBP	0	1.16459	0.644	0.033	0	10
FIS1	0	0.969429	0.644	0.043	0	10
HNRNPC	0	1.1129	0.644	0.036	0	10
MT-ND5	0	1.11553	0.644	0.047	0	10
PPP1R14C	0	1.0884	0.644	0.035	0	10
RBPMS	0	0.993379	0.644	0.033	0	10
S100A13	0	1.03797	0.644	0.037	0	10
SERBP1	0	0.979114	0.644	0.034	0	10
MYL12B	0	1.0567	0.64	0.032	0	10
PPP1R14B	0	1.03434	0.64	0.042	0	10
SNX3	0	1.17963	0.64	0.046	0	10
TXNL4A	0	0.975864	0.64	0.035	0	10
AURKAIP1	0	0.936133	0.637	0.039	0	10
BANF1	0	1.0143	0.637	0.039	0	10
CTNNB1	0	0.971562	0.637	0.03	0	10
GHITM	0	1.00007	0.637	0.03	0	10
LAMA4	0	0.960005	0.637	0.035	0	10
PNKD	0	0.979686	0.637	0.036	0	10
PSMB5	0	0.898565	0.637	0.034	0	10
HNRNPDL	0	1.03999	0.634	0.033	0	10
NDUFAF3	0	0.876979	0.634	0.035	0	10
PHB	0	0.905261	0.634	0.039	0	10
PTTG1IP	0	0.943077	0.634	0.037	0	10
NDUFA8	0	0.961195	0.631	0.034	0	10
SEPTIN2	0	1.00811	0.631	0.033	0	10
ALPK2	0	0.977534	0.628	0.036	0	10
CFL2	0	1.01568	0.628	0.029	0	10
PCBP2	0	1.0816	0.628	0.038	0	10
UGP2	0	1.01323	0.628	0.038	0	10
GUK1	0	0.956431	0.625	0.039	0	10
PALLD	0	0.988708	0.625	0.033	0	10
POLR2E	0	0.90849	0.625	0.033	0	10
TECRL	0	1.21322	0.625	0.03	0	10
DLK1	1.20295e-198	1.26617	0.622	0.097	1.85303e-194	10
ILK	0	0.945855	0.622	0.031	0	10
AP2S1	0	0.917408	0.619	0.03	0	10
DMAC1	0	0.865807	0.619	0.032	0	10
NME4	0	0.949454	0.619	0.037	0	10
POMP	0	0.984633	0.619	0.03	0	10
CANX	0	0.942701	0.616	0.034	0	10
CDC42	5.01572e-296	0.891765	0.616	0.065	7.72621e-292	10
ECI1	0	0.860243	0.616	0.031	0	10
NDUFB6	0	0.945846	0.616	0.034	0	10
SDHA	0	1.04602	0.616	0.032	0	10
TAF10	0	0.891416	0.616	0.031	0	10
CCT3	0	0.858002	0.613	0.036	0	10
COX17	0	1.00487	0.613	0.033	0	10
CSDE1	0	0.842079	0.613	0.052	0	10
CYB5R3	0	0.952817	0.613	0.036	0	10
DYNLT1	0	0.923927	0.613	0.028	0	10
MRPL33	0	0.932805	0.613	0.034	0	10
PDE4DIP	0	1.1235	0.613	0.033	0	10
PET100	0	0.933465	0.613	0.037	0	10
C4orf3	0	1.02065	0.61	0.031	0	10
HSPB3	0	1.11327	0.61	0.031	0	10
PDCD5	0	0.905275	0.61	0.028	0	10
TRMT112	0	0.926853	0.61	0.034	0	10
CD151	0	0.869601	0.607	0.031	0	10
COL1A1	1.26278e-126	0.918565	0.607	0.141	1.94518e-122	10
EIF3L	0	0.917802	0.607	0.033	0	10
GADD45GIP1	0	0.853218	0.607	0.036	0	10
OBSCN	0	0.939646	0.607	0.033	0	10
PCBD1	0	0.959422	0.607	0.035	0	10
UBE2S	0	0.939855	0.607	0.039	0	10
VCP	0	0.920497	0.607	0.03	0	10
ACTG1	0	1.06291	0.604	0.044	0	10
BMP5	0	1.00083	0.604	0.033	0	10
EID1	0	0.851432	0.604	0.025	0	10
HADHA	0	0.855035	0.604	0.033	0	10
RBM38	0	0.803108	0.604	0.026	0	10
SPTAN1	0	0.918914	0.604	0.032	0	10
TMEM141	0	0.865309	0.604	0.034	0	10
CIAO2B	0	0.82096	0.601	0.037	0	10
ANAPC16	0	0.888337	0.598	0.032	0	10
ATP1B1	0	0.971234	0.598	0.03	0	10
PDHA1	0	1.01031	0.598	0.029	0	10
SNRPG	0	0.887692	0.598	0.03	0	10
ARL6IP4	0	0.828628	0.595	0.036	0	10
ASAH1	0	0.896954	0.595	0.03	0	10
BVES	0	0.93496	0.595	0.035	0	10
CALU	0	0.871459	0.595	0.032	0	10
H2AZ1	1.63124e-119	0.823659	0.595	0.148	2.51276e-115	10
LSM4	0	0.86139	0.595	0.032	0	10
PAM	0	0.975194	0.595	0.032	0	10
PSMB1	0	0.838945	0.595	0.028	0	10
BLOC1S1	0	0.836674	0.592	0.04	0	10
FLNA	0	0.976835	0.592	0.033	0	10
MLLT11	0	1.02877	0.592	0.034	0	10
PSMB4	0	0.822907	0.592	0.031	0	10
QKI	0	0.926239	0.592	0.034	0	10
SSR3	0	0.987228	0.592	0.037	0	10
DPYSL3	0	1.03648	0.589	0.028	0	10
EMILIN2	0	0.837772	0.589	0.026	0	10
H2AZ2	0	0.837985	0.589	0.028	0	10
HACD1	0	0.903285	0.589	0.028	0	10
MRPS21	0	0.966758	0.589	0.035	0	10
ACADVL	0	0.851229	0.586	0.03	0	10
CCT4	0	0.855805	0.586	0.043	0	10
CST3	0	0.840006	0.586	0.038	0	10
EIF3F	0	0.817342	0.586	0.034	0	10
FKBP3	0	0.844635	0.586	0.026	0	10
NDUFB5	0	0.878387	0.586	0.028	0	10
ACTA1	0	1.12076	0.583	0.053	0	10
ARL6IP5	0	0.886797	0.583	0.03	0	10
CLU	0	1.07089	0.583	0.041	0	10
GABARAPL2	0	1.03755	0.583	0.03	0	10
NPC2	0	0.87764	0.583	0.028	0	10
PSMA7	0	0.882322	0.583	0.031	0	10
SUB1	0	0.934761	0.583	0.029	0	10
TSC22D1	0	0.921155	0.583	0.018	0	10
SF3B5	0	0.818752	0.58	0.029	0	10
NCAM1	0	0.940002	0.577	0.028	0	10
PSMD8	0	0.789487	0.577	0.03	0	10
UQCC2	0	0.808101	0.577	0.031	0	10
VEGFB	0	0.890552	0.577	0.037	0	10
COL1A2	3.63495e-153	0.974894	0.574	0.105	5.59928e-149	10
DBI	0	0.881223	0.574	0.032	0	10
MFGE8	0	0.877767	0.574	0.038	0	10
MXRA7	0	0.870347	0.574	0.022	0	10
BTG1	1.55567e-27	0.433387	0.571	0.309	2.39636e-23	10
CCT7	0	0.818429	0.571	0.033	0	10
HMGN3	0	0.918094	0.571	0.024	0	10
LRPAP1	0	0.837647	0.571	0.027	0	10
COL2A1	0	1.07408	0.568	0.024	0	10
ERBB2	0	0.846044	0.568	0.023	0	10
GOT1	0	0.845728	0.568	0.025	0	10
KTN1	0	0.821413	0.568	0.03	0	10
MAP1LC3B	0	0.843761	0.568	0.026	0	10
RBM24	6.03835e-157	0.856689	0.568	0.104	9.30147e-153	10
TAGLN	0	1.39186	0.568	0.047	0	10
VCAN	0	0.835188	0.568	0.041	0	10
XRCC6	0	0.835097	0.568	0.031	0	10
MRFAP1	0	0.810496	0.565	0.03	0	10
TBCA	0	0.930958	0.565	0.032	0	10
COL3A1	5.78841e-183	1.24679	0.562	0.085	8.91647e-179	10
COPE	0	0.795769	0.562	0.032	0	10
DDX17	0	0.899127	0.562	0.025	0	10
LSM7	0	0.769926	0.562	0.033	0	10
PSMB7	0	0.794594	0.562	0.029	0	10
ATP2B4	0	0.916426	0.559	0.03	0	10
HMGN1	0	0.864811	0.559	0.026	0	10
PHB2	0	0.727339	0.559	0.027	0	10
SMS	0	0.846198	0.559	0.023	0	10
SYNPO2L	0	0.81403	0.559	0.024	0	10
ABLIM1	0	0.774414	0.556	0.029	0	10
CLTB	0	0.741545	0.556	0.033	0	10
CTNNA1	0	0.826648	0.556	0.03	0	10
LMNA	0	0.773318	0.556	0.032	0	10
MRPL20	0	0.77278	0.556	0.023	0	10
OBSL1	0	0.834806	0.556	0.023	0	10
BRI3	0	0.768247	0.553	0.035	0	10
RPN2	0	0.825273	0.553	0.025	0	10
S100A6	0	0.777014	0.553	0.042	0	10
SAP18	0	0.855501	0.553	0.027	0	10
CORIN	0	0.826777	0.55	0.023	0	10
NAA38	0	0.655635	0.55	0.032	0	10
POLR2F	0	0.749517	0.55	0.029	0	10
PTOV1	0	0.827643	0.55	0.033	0	10
ADCY5	0	0.918366	0.547	0.026	0	10
ATP6V0B	0	0.779362	0.547	0.027	0	10
ATP6V1F	1.67522e-296	0.74511	0.547	0.048	2.58051e-292	10
BZW2	0	0.86849	0.547	0.035	0	10
[truncated: 1,138 more rows]

## Sheet: d
Significantly DE genes in human engrafted cluster3,7,8 and 12 in 1-, 4- and 12-weeks post transplantation
Gene	p_val	avg_log2FC	pct.1	pct.2	p_val_adj	cluster
NPPA	0	2.43437	0.937	0.272	0	3
GAPDH	0	2.20736	0.997	0.585	0	3
EEF1A1	0	2.17097	0.998	0.548	0	3
ACTC1	0	2.09203	0.997	0.584	0	3
MYH7	0	2.01687	1	0.725	0	3
MYBPC3	0	2.00615	0.967	0.447	0	3
MYL4	0	1.96066	0.993	0.527	0	3
TPM1	0	1.89589	1	0.771	0	3
MYL7	0	1.89433	1	0.714	0	3
MT-CO1	0	1.84951	0.997	0.581	0	3
RPL41	0	1.82223	0.997	0.564	0	3
TNNI1	0	1.81712	0.998	0.597	0	3
MT-CYB	0	1.79583	0.994	0.577	0	3
RPS29	0	1.74637	0.966	0.413	0	3
MT-CO2	0	1.74401	0.999	0.644	0	3
TNNT2	0	1.73347	0.997	0.569	0	3
TTN	0	1.72322	0.972	0.465	0	3
SORBS2	0	1.71996	0.866	0.199	0	3
LDHB	0	1.71914	0.897	0.22	0	3
RPLP1	0	1.71002	1	0.606	0	3
RPS2	0	1.70958	0.979	0.447	0	3
NREP	0	1.69983	0.88	0.289	0	3
MDK	0	1.69906	0.875	0.201	0	3
MDH1	0	1.69424	0.864	0.195	0	3
CSRP3	0	1.69251	0.962	0.438	0	3
FHL2	0	1.67772	0.966	0.398	0	3
ENO3	0	1.66636	0.896	0.209	0	3
MYL3	0	1.65729	0.99	0.575	0	3
RPLP0	0	1.65431	0.927	0.337	0	3
HSPB7	0	1.64844	0.957	0.392	0	3
ATP5F1B	0	1.64595	0.896	0.283	0	3
RPS12	0	1.63874	0.961	0.427	0	3
RPS27	0	1.63832	0.978	0.481	0	3
RPL37	0	1.63799	0.962	0.405	0	3
RPL39	0	1.63736	0.946	0.386	0	3
FABP3	0	1.63076	0.934	0.351	0	3
RPL36A	0	1.63053	0.853	0.215	0	3
RPL10	0	1.63024	0.991	0.525	0	3
MT-ND4	0	1.62645	0.997	0.638	0	3
RPL13	0	1.62067	0.988	0.479	0	3
RPS8	0	1.61791	0.943	0.388	0	3
COL18A1	0	1.61584	0.861	0.176	0	3
ATP5ME	0	1.61353	0.933	0.343	0	3
RPL8	0	1.61287	0.976	0.439	0	3
RPS3A	0	1.61113	0.945	0.396	0	3
RPL37A	0	1.6065	0.983	0.507	0	3
COX5A	0	1.60309	0.875	0.203	0	3
RPL4	0	1.60269	0.917	0.311	0	3
GNAS	0	1.60225	0.91	0.306	0	3
TNNI3	0	1.60171	0.983	0.491	0	3
RPS18	0	1.60092	0.946	0.399	0	3
CRIP2	0	1.59976	0.891	0.231	0	3
RPS14	0	1.5985	0.957	0.394	0	3
RPS24	0	1.59728	0.927	0.37	0	3
RPL3	0	1.59599	0.892	0.222	0	3
LAPTM4B	0	1.59563	0.831	0.176	0	3
RPS15A	0	1.59432	0.95	0.401	0	3
RPS28	0	1.59134	0.976	0.467	0	3
RPL5	0	1.58809	0.881	0.255	0	3
PRDX2	0	1.58802	0.88	0.202	0	3
RPL34	0	1.57659	0.928	0.355	0	3
NACA	0	1.57241	0.843	0.187	0	3
MYL6	0	1.56958	0.982	0.493	0	3
COX7B	0	1.56613	0.879	0.262	0	3
TNNC1	0	1.56587	1	0.652	0	3
RPL7	0	1.55851	0.897	0.284	0	3
MT-CO3	0	1.55593	0.999	0.643	0	3
UQCRH	0	1.55313	0.859	0.21	0	3
RPL35	0	1.55117	0.965	0.416	0	3
RPL12	0	1.5499	0.908	0.321	0	3
LDHA	0	1.54805	0.82	0.144	0	3
MYL9	0	1.54706	0.972	0.477	0	3
CKM	0	1.54564	0.902	0.239	0	3
TPT1	0	1.54507	0.977	0.46	0	3
RPL32	0	1.54373	0.96	0.429	0	3
MGST3	0	1.53657	0.885	0.226	0	3
ACTN2	0	1.5338	0.907	0.285	0	3
ATP5F1A	0	1.53245	0.853	0.193	0	3
PLN	0	1.53208	0.966	0.425	0	3
RPL9	0	1.52957	0.931	0.352	0	3
NEBL	0	1.52513	0.815	0.174	0	3
RPL13A	0	1.51593	0.958	0.406	0	3
VIM	0	1.51203	0.875	0.206	0	3
RRAD	0	1.50928	0.873	0.204	0	3
HSP90AA1	0	1.50635	0.84	0.191	0	3
TUBA1B	0	1.50495	0.863	0.208	0	3
SLC25A3	0	1.50394	0.844	0.202	0	3
SLC25A4	0	1.50322	0.861	0.198	0	3
RPS6	0	1.49995	0.902	0.319	0	3
RACK1	0	1.49992	0.878	0.221	0	3
RPS7	0	1.48251	0.882	0.271	0	3
RPL35A	0	1.48241	0.921	0.344	0	3
TPI1	0	1.47887	0.865	0.209	0	3
RPL15	0	1.47561	0.947	0.373	0	3
ATP5MC1	0	1.47527	0.838	0.18	0	3
PPIA	0	1.47225	0.841	0.192	0	3
MT-ATP6	0	1.47078	0.995	0.605	0	3
NDUFA4	0	1.46916	0.919	0.326	0	3
MT-ND1	0	1.46384	0.95	0.452	0	3
ATP5MC3	0	1.46333	0.854	0.203	0	3
RPL31	0	1.46131	0.907	0.321	0	3
CYCS	0	1.4594	0.809	0.168	0	3
RPS23	0	1.45781	0.941	0.383	0	3
RPL29	0	1.45302	0.953	0.399	0	3
RPL7A	0	1.45262	0.929	0.33	0	3
MYL2	0	1.45157	1	0.688	0	3
COX5B	0	1.45102	0.926	0.323	0	3
SELENOW	0	1.44932	0.943	0.372	0	3
PKM	0	1.4452	0.848	0.191	0	3
RPL24	0	1.43993	0.894	0.295	0	3
RPS15	0	1.4399	0.971	0.449	0	3
RPL36	0	1.4327	0.969	0.447	0	3
COX6C	0	1.43145	0.873	0.246	0	3
RPL27	0	1.43135	0.892	0.264	0	3
RPL11	0	1.42852	0.919	0.33	0	3
COX7C	0	1.42687	0.925	0.354	0	3
RPL18A	0	1.41797	0.979	0.483	0	3
RPS27A	0	1.41356	0.92	0.353	0	3
ATP5MD	0	1.41211	0.83	0.192	0	3
RPSA	0	1.41171	0.9	0.292	0	3
RPL23	0	1.40716	0.845	0.196	0	3
RPL18	0	1.4052	0.946	0.382	0	3
FAU	0	1.40195	0.953	0.37	0	3
RPS3	0	1.39973	0.919	0.317	0	3
RPLP2	0	1.39575	0.932	0.375	0	3
EEF2	0	1.38835	0.869	0.219	0	3
COX4I1	0	1.38692	0.887	0.267	0	3
MT-ND3	0	1.3837	0.981	0.558	0	3
RPS13	0	1.3818	0.9	0.326	0	3
RPL6	0	1.37653	0.878	0.258	0	3
UQCR10	0	1.37641	0.866	0.212	0	3
SRP14	0	1.3743	0.846	0.238	0	3
RPS19	0	1.37354	0.95	0.408	0	3
RPL19	0	1.37234	0.909	0.32	0	3
LDB3	0	1.37135	0.796	0.18	0	3
DES	0	1.37122	0.97	0.42	0	3
RPS4X	0	1.37036	0.854	0.237	0	3
RPL21	0	1.36211	0.931	0.362	0	3
COX6B1	0	1.35797	0.9	0.272	0	3
RPL28	0	1.3505	0.944	0.401	0	3
ATP5PO	0	1.35021	0.818	0.178	0	3
UBB	0	1.34964	0.896	0.271	0	3
RPL38	0	1.3481	0.863	0.249	0	3
RPL26	0	1.34693	0.88	0.3	0	3
NPPB	0	1.34546	0.728	0.131	0	3
RPL30	0	1.33905	0.936	0.379	0	3
RPS21	0	1.33284	0.931	0.358	0	3
FTH1	0	1.33233	0.986	0.487	0	3
RPS10	0	1.33199	0.906	0.302	0	3
RPS11	0	1.33086	0.899	0.292	0	3
CD81	0	1.32095	0.88	0.209	0	3
MT-ND2	0	1.31861	0.921	0.415	0	3
NDUFA1	0	1.31618	0.815	0.184	0	3
SLC25A6	0	1.31446	0.806	0.175	0	3
ATP5MG	0	1.31163	0.806	0.187	0	3
RPS25	0	1.30693	0.887	0.277	0	3
UQCR11	0	1.30551	0.903	0.298	0	3
BVES	0	1.30327	0.739	0.135	0	3
EEF1A2	0	1.30319	0.836	0.217	0	3
ATP5MF	0	1.30261	0.81	0.184	0	3
NDUFB1	0	1.3019	0.795	0.178	0	3
RPS16	0	1.2989	0.915	0.343	0	3
NDUFB2	0	1.29629	0.856	0.206	0	3
UBC	0	1.29531	0.854	0.217	0	3
NAP1L1	0	1.29353	0.773	0.156	0	3
ATP5PF	0	1.29246	0.824	0.184	0	3
YBX1	0	1.28552	0.79	0.179	0	3
RPS5	0	1.26546	0.879	0.291	0	3
UQCRQ	0	1.26423	0.895	0.301	0	3
ATP5MPL	0	1.26398	0.81	0.18	0	3
RPL27A	0	1.26235	0.835	0.208	0	3
RPL22	0	1.26079	0.803	0.185	0	3
MIF	0	1.25338	0.763	0.139	0	3
RPS9	0	1.25227	0.871	0.242	0	3
FLNC	0	1.25141	0.826	0.202	0	3
COX8A	0	1.25029	0.868	0.228	0	3
RPS17	0	1.25017	0.784	0.173	0	3
SLC25A5	0	1.23718	0.772	0.147	0	3
ATP1A1	0	1.23571	0.73	0.125	0	3
GNG5	0	1.23172	0.788	0.174	0	3
SNTA1	0	1.22842	0.809	0.177	0	3
HNRNPA1	0	1.22813	0.768	0.168	0	3
RPL17	0	1.22626	0.767	0.165	0	3
COX6A1	0	1.22338	0.784	0.171	0	3
TMSB10	0	1.22075	0.948	0.424	0	3
RPL14	0	1.22067	0.82	0.208	0	3
ATP2A2	0	1.22028	0.805	0.184	0	3
COX7A2	0	1.21916	0.823	0.188	0	3
HOPX	0	1.2189	0.676	0.089	0	3
RPL23A	0	1.20895	0.871	0.28	0	3
NDUFS5	0	1.20754	0.835	0.198	0	3
SERF2	0	1.20669	0.977	0.657	0	3
NDUFS6	0	1.20547	0.809	0.188	0	3
PGAM1	0	1.2028	0.745	0.141	0	3
PGK1	0	1.20017	0.752	0.145	0	3
TUBB4B	0	1.19017	0.776	0.154	0	3
POPDC2	0	1.18905	0.787	0.176	0	3
ENO1	0	1.17827	0.753	0.143	0	3
RHOQ	0	1.17729	0.726	0.139	0	3
UQCRB	0	1.17468	0.831	0.232	0	3
RPS20	0	1.17458	0.817	0.196	0	3
NDUFA11	0	1.17179	0.844	0.209	0	3
RPL10A	0	1.17054	0.808	0.2	0	3
HINT1	0	1.15978	0.784	0.172	0	3
PAM	0	1.15876	0.74	0.145	0	3
PCBP2	0	1.15872	0.675	0.131	0	3
UBA52	0	1.15525	0.854	0.239	0	3
SLC8A1	0	1.1517	0.715	0.132	0	3
PPP1R12B	0	1.14773	0.678	0.105	0	3
TGM2	0	1.14355	0.733	0.134	0	3
SMPX	0	1.14185	0.748	0.142	0	3
PFKP	0	1.13609	0.711	0.131	0	3
HSPA8	0	1.1326	0.722	0.136	0	3
UBL5	0	1.13007	0.813	0.194	0	3
HNRNPA2B1	0	1.12643	0.675	0.127	0	3
STMN1	0	1.12296	0.742	0.163	0	3
ELOB	0	1.11881	0.842	0.229	0	3
HSP90AB1	0	1.11446	0.767	0.17	0	3
HSPE1	0	1.10771	0.693	0.134	0	3
CD63	0	1.09938	0.8	0.197	0	3
COMMD6	0	1.08931	0.729	0.155	0	3
LTBP1	0	1.08555	0.72	0.144	0	3
DYNLL1	0	1.08322	0.729	0.145	0	3
CHCHD10	0	1.08244	0.875	0.276	0	3
MMP15	0	1.07917	0.725	0.156	0	3
FBN2	0	1.07528	0.673	0.111	0	3
PDLIM1	0	1.07015	0.705	0.132	0	3
COX6A2	0	1.06976	0.855	0.236	0	3
BSG	0	1.06873	0.792	0.198	0	3
TUBB	0	1.06777	0.795	0.19	0	3
B2M	0	1.06523	0.761	0.169	0	3
PDLIM5	0	1.05968	0.756	0.168	0	3
ABLIM1	0	1.05906	0.697	0.133	0	3
EIF1	0	1.05752	0.821	0.194	0	3
TMA7	0	1.05316	0.739	0.159	0	3
H3-3A	0	1.05304	0.874	0.449	0	3
RPS26	0	1.05249	0.769	0.165	0	3
NKX2-5	0	1.04953	0.765	0.16	0	3
EEF1B2	0	1.04143	0.728	0.159	0	3
COL4A1	0	1.04141	0.703	0.143	0	3
GPI	0	1.04101	0.713	0.145	0	3
GPX4	0	1.03568	0.748	0.176	0	3
NDUFA6	0	1.03516	0.72	0.152	0	3
SNU13	0	1.03166	0.678	0.122	0	3
DDX17	0	1.03163	0.661	0.131	0	3
COL4A2	0	1.03152	0.727	0.157	0	3
ATP5F1D	0	1.02948	0.79	0.198	0	3
YWHAZ	0	1.02909	0.671	0.122	0	3
ACTA1	0	1.02863	0.757	0.188	0	3
KRT8	0	1.02848	0.727	0.171	0	3
ATP5MC2	0	1.02676	0.788	0.179	0	3
FITM1	0	1.02663	0.744	0.158	0	3
VDAC2	0	1.02618	0.706	0.14	0	3
MDH2	0	1.02533	0.716	0.141	0	3
CRYAB	0	1.02207	0.963	0.417	0	3
MTCH1	0	1.01864	0.699	0.135	0	3
EIF3K	0	1.01552	0.734	0.156	0	3
CLIC4	0	1.01415	0.697	0.138	0	3
PPDPF	0	1.01009	0.729	0.163	0	3
MYOZ2	0	1.00884	0.74	0.161	0	3
TLE5	0	1.0088	0.742	0.171	0	3
OAZ1	0	1.00824	0.778	0.183	0	3
IDH2	0	1.00678	0.721	0.148	0	3
ATP5F1E	0	1.00532	0.753	0.174	0	3
MYOM1	0	1.00137	0.722	0.153	0	3
ATP1B1	0	1.00052	0.672	0.116	0	3
HSPD1	0	0.995925	0.642	0.103	0	3
SPTBN1	0	0.995127	0.686	0.134	0	3
CALM2	0	0.994655	0.687	0.146	0	3
GOT1	0	0.992301	0.641	0.099	0	3
HSF1	0	0.991938	0.714	0.149	0	3
CKB	0	0.989836	0.697	0.136	0	3
MRPL41	0	0.989694	0.744	0.169	0	3
UQCRC1	0	0.981773	0.729	0.158	0	3
TPM2	0	0.98148	0.655	0.11	0	3
SDHA	0	0.977065	0.682	0.125	0	3
MFGE8	0	0.971057	0.742	0.176	0	3
NDUFA3	0	0.970731	0.747	0.162	0	3
IGFBP7	0	0.9694	0.687	0.14	0	3
FXYD6	0	0.964855	0.69	0.135	0	3
BNIP3	0	0.962763	0.626	0.092	0	3
ATP5IF1	0	0.961528	0.712	0.153	0	3
EIF1B	0	0.958978	0.677	0.138	0	3
MICOS10	0	0.958909	0.68	0.137	0	3
EEF1D	0	0.957358	0.755	0.177	0	3
PDE4DIP	0	0.955502	0.672	0.132	0	3
NDUFA13	0	0.949862	0.818	0.208	0	3
SSR3	0	0.947627	0.687	0.133	0	3
EZR	0	0.944618	0.647	0.114	0	3
MT-ND5	0	0.943516	0.705	0.181	0	3
LAMB2	0	0.943046	0.724	0.169	0	3
PRDX5	0	0.942419	0.759	0.196	0	3
BTF3	0	0.941324	0.691	0.144	0	3
CXCL12	0	0.941077	0.656	0.126	0	3
SKP1	0	0.93814	0.698	0.149	0	3
PHPT1	0	0.936226	0.741	0.183	0	3
PTMA	0	0.931038	0.671	0.148	0	3
HMGN2	0	0.929561	0.651	0.13	0	3
EIF4A2	0	0.927792	0.672	0.141	0	3
QKI	0	0.926715	0.651	0.12	0	3
BMP5	0	0.926156	0.613	0.098	0	3
COX17	0	0.917517	0.627	0.123	0	3
YWHAQ	0	0.91692	0.65	0.119	0	3
ATP5F1C	0	0.916002	0.664	0.124	0	3
CCNI	0	0.915648	0.681	0.146	0	3
TOMM7	0	0.912255	0.741	0.168	0	3
PFN1	0	0.911166	0.728	0.168	0	3
NPM1	0	0.910648	0.652	0.132	0	3
COPS9	0	0.909662	0.723	0.157	0	3
CUTA	0	0.908504	0.68	0.135	0	3
IDH3A	0	0.906249	0.61	0.09	0	3
UQCRFS1	0	0.90555	0.67	0.137	0	3
VDAC1	0	0.904894	0.629	0.115	0	3
POLR2L	0	0.904883	0.779	0.197	0	3
KRT18	0	0.903107	0.67	0.14	0	3
GPC1	0	0.898591	0.687	0.152	0	3
NDUFV1	0	0.897736	0.672	0.139	0	3
ATP2B4	0	0.893968	0.61	0.114	0	3
PPP1CB	0	0.893163	0.652	0.124	0	3
EDF1	0	0.891035	0.737	0.178	0	3
SERBP1	0	0.890522	0.641	0.111	0	3
EMILIN2	0	0.889673	0.623	0.103	0	3
OBSCN	0	0.889322	0.661	0.138	0	3
HSPB1	0	0.888874	0.942	0.428	0	3
TSPAN9	0	0.887352	0.62	0.091	0	3
ACO2	0	0.886787	0.687	0.143	0	3
HSPG2	0	0.883889	0.632	0.124	0	3
GPX1	0	0.882153	0.665	0.146	0	3
NDUFB7	0	0.881427	0.762	0.197	0	3
ATP5PD	0	0.88128	0.695	0.146	0	3
PRKAR1A	0	0.878129	0.663	0.132	0	3
ECI1	0	0.877563	0.647	0.12	0	3
HNRNPC	0	0.875676	0.63	0.115	0	3
CORO6	0	0.875376	0.574	0.083	0	3
ITGB1	0	0.875097	0.67	0.135	0	3
HNRNPK	0	0.87341	0.624	0.123	0	3
OST4	0	0.872118	0.758	0.176	0	3
SNX3	0	0.869252	0.656	0.13	0	3
ISYNA1	0	0.868864	0.57	0.076	0	3
NDUFB3	0	0.868567	0.65	0.131	0	3
ATP5PB	0	0.86668	0.614	0.108	0	3
EIF4G2	0	0.866369	0.648	0.126	0	3
PDHA1	0	0.866029	0.58	0.091	0	3
C12orf75	0	0.865429	0.56	0.081	0	3
MORF4L1	0	0.862382	0.663	0.141	0	3
PTP4A3	0	0.860982	0.68	0.145	0	3
NUDT4	0	0.858229	0.623	0.12	0	3
CD151	0	0.851149	0.708	0.167	0	3
NDUFB11	0	0.84705	0.723	0.166	0	3
NDUFB10	0	0.837655	0.706	0.149	0	3
LIMS2	0	0.837422	0.63	0.122	0	3
CTNNA1	0	0.835876	0.614	0.116	0	3
ASAH1	0	0.835044	0.697	0.154	0	3
PSAP	0	0.834337	0.68	0.16	0	3
HSBP1	0	0.833849	0.625	0.127	0	3
NCAM1	0	0.83366	0.627	0.128	0	3
UQCRC2	0	0.83256	0.602	0.114	0	3
CSDE1	0	0.831456	0.629	0.126	0	3
NDUFAB1	0	0.83061	0.655	0.137	0	3
RPS4Y1	0	0.828785	0.611	0.122	0	3
LBH	0	0.823115	0.62	0.137	0	3
CFL1	0	0.822688	0.721	0.17	0	3
GTF2I	0	0.822034	0.604	0.118	0	3
VEGFB	0	0.820968	0.654	0.133	0	3
MYH7B	0	0.820017	0.583	0.119	0	3
ANXA6	0	0.818845	0.633	0.132	0	3
HIF3A	0	0.818131	0.58	0.08	0	3
APLP2	0	0.818091	0.614	0.121	0	3
GSTP1	0	0.815604	0.72	0.197	0	3
RBPMS	0	0.815535	0.606	0.116	0	3
ALPK2	0	0.815232	0.569	0.074	0	3
PCBP1	0	0.814907	0.595	0.111	0	3
SMYD1	0	0.814317	0.629	0.125	0	3
FSTL1	0	0.81405	0.633	0.138	0	3
YWHAE	0	0.810296	0.614	0.122	0	3
HNRNPH1	0	0.809941	0.547	0.098	0	3
SEC61G	0	0.809197	0.604	0.125	0	3
HSPB2	0	0.80776	0.628	0.132	0	3
BRI3	0	0.807339	0.626	0.123	0	3
ROMO1	0	0.80685	0.65	0.15	0	3
EIF3L	0	0.806122	0.614	0.124	0	3
GHITM	0	0.805473	0.598	0.11	0	3
TIMM13	0	0.805419	0.602	0.121	0	3
PFDN5	0	0.803655	0.711	0.173	0	3
PET100	0	0.795084	0.62	0.126	0	3
NNT	0	0.79368	0.559	0.085	0	3
RTL8C	0	0.792258	0.664	0.146	0	3
GAS6	0	0.791173	0.627	0.13	0	3
RTN4	0	0.790853	0.602	0.121	0	3
CTNNB1	0	0.79077	0.567	0.097	0	3
PTTG1IP	0	0.790421	0.581	0.09	0	3
NAV1	0	0.790246	0.562	0.085	0	3
HK1	0	0.789337	0.59	0.099	0	3
UNC45B	0	0.787649	0.604	0.112	0	3
PABPC1	0	0.786626	0.64	0.159	0	3
HIGD2A	0	0.784379	0.683	0.149	0	3
CALU	0	0.778862	0.58	0.106	0	3
ACADVL	0	0.777538	0.63	0.147	0	3
CIRBP	0	0.777049	0.594	0.127	0	3
GATA6	0	0.777038	0.555	0.103	0	3
SEPTIN2	0	0.773932	0.565	0.101	0	3
CYC1	0	0.770982	0.646	0.147	0	3
ARL6IP5	0	0.770966	0.578	0.113	0	3
STARD7	0	0.77079	0.569	0.099	0	3
PPP1R1A	0	0.770385	0.618	0.132	0	3
PNKD	0	0.77004	0.603	0.125	0	3
PPP1R14C	0	0.769467	0.566	0.092	0	3
UBE2S	0	0.768971	0.556	0.096	0	3
S100A6	0	0.764195	0.718	0.184	0	3
AP2M1	0	0.764147	0.614	0.136	0	3
HADHA	0	0.760293	0.65	0.152	0	3
NDUFA12	0	0.759768	0.603	0.129	0	3
OBSL1	0	0.758512	0.56	0.096	0	3
PPIF	0	0.757749	0.525	0.064	0	3
MCRIP2	0	0.754137	0.597	0.118	0	3
BEX3	0	0.753843	0.589	0.122	0	3
NDUFS7	0	0.752565	0.645	0.153	0	3
FHOD3	0	0.75197	0.56	0.104	0	3
SRRM2	0	0.751313	0.521	0.09	0	3
SOD1	0	0.7499	0.618	0.136	0	3
CAMK2D	0	0.748762	0.56	0.103	0	3
PPP2R1A	0	0.748369	0.598	0.117	0	3
TUFM	0	0.747664	0.609	0.124	0	3
HMGN3	0	0.747348	0.543	0.102	0	3
RPL36AL	0	0.747178	0.623	0.133	0	3
NDUFB4	0	0.746642	0.678	0.155	0	3
MICOS13	0	0.74633	0.645	0.148	0	3
AHCY	0	0.744239	0.536	0.069	0	3
CALM3	0	0.743651	0.58	0.12	0	3
ECH1	0	0.738013	0.646	0.146	0	3
NDUFB8	0	0.737971	0.606	0.13	0	3
MASP1	0	0.737885	0.543	0.084	0	3
NDUFB9	0	0.737615	0.621	0.137	0	3
ATP13A3	0	0.73664	0.518	0.06	0	3
ALPK3	0	0.735994	0.523	0.084	0	3
MRPS21	0	0.734092	0.572	0.109	0	3
ANKRD9	0	0.732056	0.56	0.11	0	3
CNN1	0	0.731936	0.581	0.134	0	3
RPS27L	0	0.730886	0.583	0.123	0	3
PTOV1	0	0.73056	0.557	0.104	0	3
MAP3K20	0	0.729531	0.561	0.116	0	3
PRDX6	0	0.728242	0.595	0.124	0	3
AKR1B1	0	0.726798	0.55	0.09	0	3
CKMT2	0	0.726727	0.595	0.122	0	3
NDUFS8	0	0.724382	0.649	0.157	0	3
RAN	0	0.721929	0.558	0.11	0	3
SLC4A3	0	0.720473	0.549	0.102	0	3
CNBP	0	0.719327	0.538	0.103	0	3
LAMTOR5	0	0.718199	0.557	0.114	0	3
H2AZ1	0	0.71525	0.572	0.138	0	3
ARF1	0	0.71314	0.573	0.116	0	3
ANAPC11	0	0.711578	0.639	0.146	0	3
TRIR	0	0.710739	0.596	0.134	0	3
PALLD	0	0.710505	0.558	0.106	0	3
TMOD1	0	0.710498	0.537	0.091	0	3
KPNA2	0	0.71015	0.489	0.049	0	3
HIGD1A	0	0.708864	0.543	0.107	0	3
WSB1	0	0.708568	0.479	0.079	0	3
FHL1	0	0.70855	0.609	0.136	0	3
TMEM258	0	0.707772	0.624	0.142	0	3
S100A13	0	0.706771	0.649	0.159	0	3
MRPL12	0	0.704615	0.57	0.122	0	3
ITM2B	0	0.70325	0.624	0.152	0	3
VEGFA	0	0.702287	0.488	0.059	0	3
PRNP	0	0.699052	0.543	0.102	0	3
CD99	0	0.698668	0.616	0.134	0	3
SEPTIN7	0	0.697487	0.547	0.097	0	3
KTN1	0	0.697383	0.53	0.095	0	3
CCND2	0	0.696717	0.533	0.105	0	3
MAP4	0	0.695528	0.575	0.128	0	3
CS	0	0.695361	0.521	0.078	0	3
MZT2B	0	0.694843	0.675	0.174	0	3
CMYA5	0	0.694652	0.6	0.132	0	3
NDUFA2	0	0.694368	0.58	0.123	0	3
RASSF4	0	0.693627	0.489	0.054	0	3
SLIRP	0	0.691353	0.544	0.11	0	3
PPP1CC	0	0.688998	0.514	0.078	0	3
WEE1	0	0.687386	0.491	0.066	0	3
ZFP36L1	0	0.684358	0.53	0.096	0	3
CANX	0	0.683259	0.544	0.109	0	3
DSP	0	0.683083	0.516	0.08	0	3
NDUFS2	0	0.682018	0.514	0.087	0	3
SRSF3	0	0.681566	0.512	0.079	0	3
NT5DC2	0	0.679496	0.534	0.1	0	3
UGP2	0	0.677045	0.542	0.102	0	3
SNRPD2	0	0.676197	0.601	0.14	0	3
DMAC1	0	0.675467	0.538	0.107	0	3
HMGN1	0	0.67437	0.514	0.093	0	3
B4GALNT3	0	0.67408	0.489	0.066	0	3
NPTN	0	0.674045	0.482	0.071	0	3
SRL	0	0.673865	0.568	0.11	0	3
TSC22D1	0	0.67216	0.5	0.072	0	3
HNRNPU	0	0.671642	0.52	0.104	0	3
NDUFC2	0	0.671156	0.567	0.124	0	3
GABARAPL2	0	0.66994	0.529	0.109	0	3
CBX3	0	0.669732	0.486	0.072	0	3
EIF4B	0	0.669333	0.538	0.102	0	3
PPP1R14B	0	0.66863	0.545	0.111	0	3
NUCKS1	0	0.66855	0.532	0.1	0	3
SLC38A1	0	0.668062	0.488	0.07	0	3
TUSC3	0	0.667573	0.481	0.076	0	3
HADHB	0	0.667267	0.606	0.135	0	3
SREBF2	0	0.665478	0.512	0.088	0	3
VDAC3	0	0.665075	0.523	0.092	0	3
SET	0	0.664869	0.506	0.084	0	3
MTUS1	0	0.663694	0.489	0.077	0	3
EIF3E	0	0.663278	0.515	0.101	0	3
RBX1	0	0.662216	0.57	0.124	0	3
NDUFB6	0	0.661931	0.575	0.121	0	3
PHB2	0	0.660602	0.535	0.106	0	3
SOD2	0	0.658828	0.519	0.101	0	3
MAZ	0	0.658544	0.521	0.09	0	3
NDUFA5	0	0.658001	0.52	0.097	0	3
H1-10	0	0.657635	0.564	0.127	0	3
CCT4	0	0.656902	0.513	0.094	0	3
RBPMS2	0	0.6561	0.493	0.072	0	3
COX14	0	0.655593	0.564	0.121	0	3
HMGB1	0	0.655082	0.584	0.153	0	3
SFPQ	0	0.653923	0.468	0.055	0	3
MT-ND4L	0	0.653618	0.554	0.143	0	3
HSPA9	0	0.65316	0.487	0.078	0	3
SNRNP70	0	0.651422	0.507	0.094	0	3
NDUFA8	0	0.651367	0.535	0.111	0	3
PHB	0	0.650865	0.536	0.101	0	3
SCP2	0	0.649829	0.479	0.075	0	3
NDUFV2	0	0.649553	0.582	0.121	0	3
NDUFB5	0	0.649262	0.54	0.109	0	3
CYB5R3	0	0.648764	0.544	0.114	0	3
PLEKHJ1	0	0.64794	0.483	0.074	0	3
TUBA1A	0	0.646397	0.563	0.145	0	3
DKK3	0	0.645705	0.543	0.117	0	3
STK39	0	0.643252	0.447	0.043	0	3
CCNG1	0	0.642227	0.475	0.059	0	3
SARAF	0	0.640888	0.499	0.09	0	3
TECRL	0	0.640335	0.517	0.104	0	3
IVNS1ABP	0	0.640019	0.464	0.065	0	3
PDLIM3	0	0.639751	0.458	0.056	0	3
NFE2L1	0	0.639615	0.516	0.096	0	3
GSN	0	0.63922	0.535	0.119	0	3
MEF2A	0	0.638989	0.504	0.09	0	3
NPC2	0	0.637551	0.507	0.098	0	3
FAM189A2	0	0.63627	0.43	0.059	0	3
MAGED1	0	0.635934	0.501	0.091	0	3
HNRNPA3	0	0.635775	0.481	0.071	0	3
MRPL34	0	0.635459	0.504	0.087	0	3
MPRIP	0	0.632313	0.502	0.091	0	3
MORF4L2	0	0.632247	0.489	0.084	0	3
EIF3F	0	0.631976	0.531	0.115	0	3
MLF1	0	0.631572	0.507	0.097	0	3
CORIN	0	0.629297	0.484	0.072	0	3
TNFRSF12A	0	0.628833	0.448	0.055	0	3
RNF207	0	0.628085	0.458	0.061	0	3
SLC12A7	0	0.627695	0.511	0.093	0	3
CISD1	0	0.627632	0.483	0.088	0	3
NEDD8	0	0.627601	0.554	0.126	0	3
MRFAP1	0	0.627431	0.518	0.105	0	3
FTL	0	0.627324	0.762	0.206	0	3
ANAPC16	0	0.62587	0.539	0.119	0	3
ERBB2	0	0.625866	0.508	0.099	0	3
P4HB	0	0.625704	0.571	0.14	0	3
EIF3M	0	0.625002	0.493	0.096	0	3
YBX3	0	0.624608	0.575	0.131	0	3
VCL	0	0.624567	0.501	0.095	0	3
AURKAIP1	0	0.62385	0.545	0.125	0	3
PFKM	0	0.623756	0.508	0.098	0	3
FUS	0	0.622967	0.493	0.098	0	3
ADCY6	0	0.622533	0.455	0.067	0	3
PARK7	0	0.622363	0.574	0.136	0	3
HMGB2	0	0.62229	0.474	0.079	0	3
PCBD1	0	0.62211	0.543	0.117	0	3
PPP1R3C	0	0.622101	0.45	0.044	0	3
AFG3L2	0	0.621281	0.502	0.089	0	3
NME4	0	0.61959	0.502	0.093	0	3
ALKBH7	0	0.617921	0.557	0.136	0	3
MTFR1L	0	0.615629	0.46	0.075	0	3
ITGAV	0	0.615297	0.484	0.098	0	3
UBE2D3	0	0.614706	0.476	0.078	0	3
DCBLD2	0	0.613672	0.445	0.056	0	3
YWHAG	0	0.613292	0.475	0.075	0	3
ETFA	0	0.611458	0.482	0.094	0	3
WDR6	0	0.611429	0.449	0.068	0	3
PSMB3	0	0.609704	0.505	0.104	0	3
GUK1	0	0.609535	0.597	0.148	0	3
ITGA7	0	0.609388	0.479	0.094	0	3
HNRNPDL	0	0.609201	0.532	0.127	0	3
MPC1	0	0.607875	0.508	0.099	0	3
NDUFA10	0	0.60408	0.477	0.087	0	3
HACD1	0	0.603158	0.497	0.101	0	3
NONO	0	0.602779	0.476	0.073	0	3
COL21A1	0	0.602759	0.481	0.084	0	3
HDAC5	0	0.602743	0.482	0.095	0	3
RBM38	0	0.600111	0.49	0.086	0	3
NDUFV3	0	0.599365	0.499	0.111	0	3
H2AZ2	0	0.599325	0.517	0.109	0	3
MAP4K4	0	0.599233	0.471	0.075	0	3
TRIM63	0	0.599122	0.497	0.102	0	3
LGR4	0	0.598305	0.46	0.069	0	3
SRSF6	0	0.598147	0.439	0.052	0	3
NDUFC1	0	0.597623	0.574	0.125	0	3
EID1	0	0.597271	0.494	0.098	0	3
HES4	0	0.59706	0.458	0.077	0	3
ARL6IP4	0	0.596539	0.528	0.123	0	3
CYB5R1	0	0.596175	0.473	0.077	0	3
MCRIP1	0	0.595908	0.514	0.114	0	3
SUCLG1	0	0.595032	0.491	0.093	0	3
PSMB4	0	0.594331	0.499	0.091	0	3
PPIC	0	0.594012	0.45	0.071	0	3
TMEM65	0	0.593255	0.427	0.049	0	3
CPVL	0	0.591664	0.468	0.069	0	3
CIAO2B	0	0.590775	0.519	0.119	0	3
FKBP3	0	0.590613	0.501	0.097	0	3
MLIP	0	0.590032	0.495	0.102	0	3
GADD45GIP1	0	0.589447	0.518	0.127	0	3
CCT7	0	0.587614	0.485	0.097	0	3
PMP22	0	0.587392	0.482	0.089	0	3
ATF4	0	0.587115	0.449	0.084	0	3
DDX5	0	0.586174	0.461	0.085	0	3
SNRPC	0	0.585247	0.491	0.097	0	3
TRIM28	0	0.584777	0.483	0.091	0	3
RNPS1	0	0.58473	0.455	0.075	0	3
WNK1	0	0.584514	0.462	0.07	0	3
ATP6V0B	0	0.584187	0.482	0.092	0	3
PTGES3	0	0.58401	0.483	0.088	0	3
SSR4	0	0.582492	0.552	0.144	0	3
MAGED2	0	0.582446	0.562	0.159	0	3
MYLK3	0	0.582158	0.461	0.078	0	3
QARS1	0	0.582132	0.452	0.061	0	3
MACROH2A1	0	0.581224	0.471	0.086	0	3
LAPTM4A	0	0.580433	0.523	0.122	0	3
TRAK1	0	0.580152	0.449	0.069	0	3
NR2F6	0	0.58007	0.461	0.065	0	3
TFRC	0	0.579672	0.418	0.047	0	3
DAG1	0	0.579663	0.492	0.095	0	3
MFN2	0	0.578482	0.467	0.082	0	3
LRPAP1	0	0.578202	0.483	0.099	0	3
DNAJA4	0	0.578066	0.422	0.049	0	3
MGAT5	0	0.577575	0.431	0.053	0	3
DENND5A	0	0.577567	0.438	0.074	0	3
ALDOA	0	0.577411	0.437	0.061	0	3
NPNT	0	0.577249	0.459	0.078	0	3
PTTG1	0	0.576424	0.428	0.06	0	3
PSMB6	0	0.576188	0.53	0.118	0	3
MAPKAPK2	0	0.575276	0.492	0.1	0	3
SAP18	0	0.575164	0.508	0.108	0	3
IMMT	0	0.575075	0.441	0.066	0	3
LSM7	0	0.574933	0.483	0.102	0	3
SLC6A8	0	0.574054	0.427	0.053	0	3
PGRMC2	0	0.573789	0.439	0.071	0	3
SUB1	0	0.573524	0.501	0.105	0	3
SF3B5	0	0.573429	0.487	0.1	0	3
BLOC1S1	0	0.573325	0.539	0.13	0	3
MRPL33	0	0.57329	0.537	0.124	0	3
NCKAP1	0	0.572857	0.458	0.079	0	3
SUN1	0	0.571885	0.419	0.073	0	3
C12orf57	0	0.571629	0.558	0.138	0	3
CCND1	0	0.571073	0.464	0.084	0	3
TACC2	0	0.570881	0.473	0.084	0	3
APOBEC2	0	0.570154	0.467	0.084	0	3
SUMO2	0	0.569215	0.491	0.103	0	3
RBM20	0	0.568218	0.44	0.066	0	3
VCP	0	0.5681	0.468	0.096	0	3
PSMB1	0	0.567391	0.47	0.094	0	3
ST13	0	0.567004	0.47	0.096	0	3
TMEM141	0	0.566903	0.465	0.089	0	3
TIMP3	0	0.566556	0.442	0.068	0	3
CLTC	0	0.56651	0.466	0.094	0	3
LRRFIP1	0	0.566273	0.446	0.078	0	3
CTSB	0	0.566253	0.466	0.087	0	3
BANF1	0	0.566143	0.53	0.12	0	3
FIS1	0	0.565558	0.572	0.14	0	3
BCAR1	0	0.56538	0.441	0.076	0	3
MPC2	0	0.564389	0.49	0.105	0	3
PABPC4	0	0.564304	0.442	0.065	0	3
ITSN2	0	0.563744	0.388	0.03	0	3
HEPH	0	0.563147	0.437	0.063	0	3
KLHDC3	0	0.562941	0.484	0.098	0	3
SVIL	0	0.560425	0.482	0.099	0	3
MYL12B	0	0.559973	0.498	0.112	0	3
RHOC	0	0.5599	0.525	0.142	0	3
TMC6	0	0.559702	0.4	0.048	0	3
POLR2E	0	0.559022	0.472	0.095	0	3
RYR2	0	0.558889	0.435	0.071	0	3
FXYD1	0	0.556713	0.585	0.149	0	3
COX7A1	0	0.556518	0.557	0.135	0	3
CCT5	0	0.555894	0.434	0.067	0	3
SNRPN	0	0.555217	0.485	0.104	0	3
EIF3H	0	0.555183	0.467	0.097	0	3
XPO4	0	0.554852	0.425	0.059	0	3
SF1	0	0.552941	0.433	0.058	0	3
XRCC6	0	0.552077	0.468	0.089	0	3
CCT3	0	0.551615	0.472	0.088	0	3
CKS2	0	0.550693	0.416	0.055	0	3
GDI2	0	0.550577	0.428	0.065	0	3
CDC42	0	0.55051	0.455	0.099	0	3
NIPSNAP2	0	0.55028	0.447	0.094	0	3
TXNL4A	0	0.550133	0.473	0.102	0	3
PRDX1	0	0.550114	0.507	0.115	0	3
LUC7L3	0	0.549903	0.414	0.058	0	3
POMP	0	0.549846	0.482	0.106	0	3
MYL12A	0	0.549578	0.57	0.137	0	3
JTB	0	0.549286	0.471	0.096	0	3
AP1S2	0	0.548386	0.441	0.079	0	3
NEXN	0	0.547987	0.479	0.099	0	3
GJA1	0	0.547537	0.417	0.065	0	3
NCL	0	0.547368	0.426	0.073	0	3
MACF1	0	0.546239	0.437	0.088	0	3
OCIAD1	0	0.545889	0.417	0.066	0	3
DPYSL3	0	0.545619	0.448	0.083	0	3
ESD	0	0.545072	0.431	0.071	0	3
BZW2	0	0.544858	0.48	0.108	0	3
DSTN	0	0.544322	0.513	0.119	0	3
NAP1L4	0	0.544114	0.438	0.077	0	3
SRSF2	0	0.544004	0.415	0.074	0	3
TYMS	0	0.542777	0.414	0.058	0	3
KCNH2	0	0.542716	0.447	0.077	0	3
PPP1R12C	0	0.542294	0.429	0.068	0	3
EIF5A	0	0.542082	0.437	0.076	0	3
CBX5	0	0.541423	0.419	0.058	0	3
PPP2R3B	0	0.540374	0.431	0.071	0	3
TMEM71	0	0.540187	0.377	0.028	0	3
PYGB	0	0.540131	0.472	0.104	0	3
ETFB	0	0.539492	0.495	0.12	0	3
TPD52L2	0	0.538583	0.415	0.065	0	3
GSTK1	0	0.537193	0.451	0.087	0	3
CAP2	0	0.536339	0.42	0.066	0	3
WNK2	0	0.535875	0.41	0.062	0	3
FAM162A	0	0.535281	0.421	0.056	0	3
MRPL15	0	0.535015	0.429	0.063	0	3
SYNPO2L	0	0.534898	0.425	0.073	0	3
ANKRD1	0	0.534605	0.385	0.073	0	3
TMEM14C	0	0.534582	0.456	0.091	0	3
PSMB7	0	0.534435	0.455	0.089	0	3
G3BP2	0	0.534381	0.396	0.046	0	3
NDUFAF8	0	0.533615	0.471	0.109	0	3
KIFAP3	0	0.531878	0.39	0.038	0	3
KIF1C	0	0.53177	0.434	0.076	0	3
MAP7D1	0	0.531506	0.462	0.095	0	3
FARP1	0	0.531323	0.415	0.059	0	3
CCNB1IP1	0	0.531157	0.391	0.04	0	3
TBCA	0	0.531152	0.471	0.101	0	3
OXA1L	0	0.530572	0.431	0.074	0	3
ESRRA	0	0.529538	0.414	0.063	0	3
SIPA1L2	0	0.529156	0.422	0.073	0	3
TIMM8B	0	0.52828	0.494	0.117	0	3
SNRPG	0	0.528104	0.463	0.101	0	3
NDRG2	0	0.527913	0.419	0.071	0	3
SYNGR2	0	0.527439	0.463	0.095	0	3
USP22	0	0.527014	0.419	0.071	0	3
TSPAN3	0	0.526615	0.44	0.079	0	3
GATA4	0	0.526608	0.421	0.069	0	3
ZFAND5	0	0.526511	0.425	0.077	0	3
LSM4	0	0.52624	0.474	0.097	0	3
AHNAK	0	0.526177	0.46	0.106	0	3
HNRNPAB	0	0.525818	0.401	0.061	0	3
ANXA11	0	0.525718	0.442	0.088	0	3
MLF2	0	0.52539	0.434	0.081	0	3
PERP	0	0.525189	0.434	0.075	0	3
REEP5	0	0.524858	0.438	0.085	0	3
FKBP1A	0	0.524235	0.424	0.077	0	3
ATXN10	0	0.523552	0.419	0.075	0	3
CAPN2	0	0.523166	0.402	0.057	0	3
ANXA5	0	0.522284	0.477	0.113	0	3
IGF1R	0	0.522275	0.398	0.049	0	3
IPO7	0	0.52109	0.396	0.054	0	3
EIF4H	0	0.521059	0.437	0.084	0	3
CCT8	0	0.520757	0.412	0.066	0	3
MXRA7	0	0.520293	0.438	0.092	0	3
PSMA7	0	0.520178	0.476	0.104	0	3
ENDOG	0	0.520139	0.388	0.049	0	3
DDB1	0	0.519765	0.415	0.064	0	3
JUND	0	0.519444	0.414	0.077	0	3
PLEC	0	0.519135	0.43	0.079	0	3
XIRP1	0	0.518938	0.415	0.073	0	3
C19orf53	0	0.517371	0.51	0.129	0	3
TOM1L2	0	0.516902	0.415	0.068	0	3
CDK16	0	0.515388	0.419	0.069	0	3
TMEM259	0	0.514747	0.403	0.072	0	3
TMSB4X	0	0.514444	0.557	0.141	0	3
PLOD1	0	0.514398	0.431	0.072	0	3
MAT2A	0	0.514369	0.361	0.027	0	3
HRC	0	0.51392	0.45	0.095	0	3
CSNK1A1	0	0.513917	0.426	0.073	0	3
UBE2H	0	0.513912	0.425	0.073	0	3
ILF2	0	0.513849	0.407	0.07	0	3
SCN5A	0	0.513636	0.39	0.047	0	3
PLXNB2	0	0.51347	0.423	0.078	0	3
COMTD1	0	0.51337	0.401	0.066	0	3
ADH5	0	0.513266	0.46	0.104	0	3
RTRAF	0	0.512349	0.447	0.084	0	3
SMC4	0	0.511533	0.39	0.057	0	3
KIDINS220	0	0.511459	0.406	0.068	0	3
MCM3	0	0.510999	0.396	0.058	0	3
SQSTM1	0	0.510769	0.452	0.106	0	3
ASPH	0	0.51063	0.396	0.067	0	3
RDX	0	0.509661	0.405	0.057	0	3
ILK	0	0.509189	0.469	0.112	0	3
PDCD5	0	0.508157	0.45	0.099	0	3
MRPL27	0	0.507944	0.404	0.066	0	3
ARGLU1	0	0.507766	0.38	0.054	0	3
KDELR2	0	0.507762	0.424	0.08	0	3
SELENOH	0	0.507605	0.452	0.088	0	3
FAM50A	0	0.507548	0.407	0.065	0	3
SMYD2	0	0.507092	0.413	0.076	0	3
GAB1	0	0.505654	0.386	0.061	0	3
SPTAN1	0	0.505055	0.441	0.091	0	3
UQCC2	0	0.504531	0.487	0.118	0	3
RAC1	0	0.503336	0.429	0.092	0	3
CRIP1	0	0.502783	0.35	0.023	0	3
TOMM20	0	0.502185	0.402	0.069	0	3
GBA2	0	0.501902	0.375	0.046	0	3
RBM39	0	0.501368	0.419	0.08	0	3
PPP2R5C	0	0.501306	0.403	0.074	0	3
PRDX3	0	0.501258	0.412	0.072	0	3
HDLBP	0	0.501141	0.455	0.103	0	3
HSPB3	0	0.501021	0.473	0.11	0	3
OGDH	0	0.500636	0.422	0.084	0	3
MICAL3	0	0.500601	0.389	0.053	0	3
RHOT2	0	0.500569	0.381	0.054	0	3
CLTB	0	0.500505	0.472	0.118	0	3
CPT1B	0	0.500388	0.395	0.071	0	3
ILF3	0	0.499862	0.408	0.067	0	3
RBBP4	0	0.499768	0.389	0.051	0	3
LAMA5	0	0.499107	0.388	0.054	0	3
GNB2	0	0.498949	0.45	0.092	0	3
LRRC10	0	0.498829	0.402	0.069	0	3
NASP	0	0.498095	0.369	0.057	0	3
TRIOBP	0	0.498003	0.416	0.081	0	3
ADD1	0	0.497923	0.412	0.075	0	3
PKP2	0	0.497738	0.45	0.103	0	3
PSMA1	0	0.497662	0.409	0.073	0	3
EIF2S3	0	0.497525	0.398	0.059	0	3
GYG1	0	0.49723	0.378	0.052	0	3
PSME1	0	0.497182	0.44	0.089	0	3
RRAGD	0	0.497004	0.376	0.042	0	3
MCM7	0	0.496682	0.39	0.059	0	3
EMC10	0	0.496639	0.407	0.084	0	3
CHD4	0	0.496323	0.4	0.062	0	3
ANP32A	0	0.49578	0.394	0.058	0	3
LMNA	0	0.495306	0.438	0.096	0	3
GNB1	0	0.495056	0.402	0.068	0	3
INPP5A	0	0.495042	0.389	0.052	0	3
DYNLT1	0	0.494916	0.488	0.118	0	3
NMRK2	0	0.494207	0.567	0.154	0	3
PLP2	0	0.493843	0.422	0.082	0	3
DPP7	0	0.493684	0.371	0.048	0	3
SH3PXD2A	0	0.493595	0.384	0.052	0	3
LMO7	0	0.492995	0.422	0.085	0	3
RHOBTB3	0	0.492465	0.38	0.051	0	3
SLC25A11	0	0.492463	0.42	0.085	0	3
NOP53	0	0.492027	0.452	0.107	0	3
RBFOX2	0	0.49181	0.39	0.059	0	3
RBMX	0	0.491654	0.39	0.063	0	3
PSMB5	0	0.491304	0.445	0.098	0	3
CAPNS1	0	0.490819	0.484	0.123	0	3
MLLT11	0	0.490773	0.396	0.068	0	3
MGAT4B	0	0.490284	0.397	0.074	0	3
NEK7	0	0.490001	0.392	0.063	0	3
DNAJA1	0	0.489883	0.394	0.058	0	3
PPP1R3B	0	0.489585	0.359	0.042	0	3
ADAM11	0	0.489405	0.348	0.026	0	3
DUT	0	0.489141	0.427	0.087	0	3
POLR2F	0	0.488807	0.428	0.091	0	3
SSBP4	0	0.488762	0.388	0.069	0	3
BMP7	0	0.488481	0.379	0.05	0	3
BEX1	0	0.488338	0.368	0.05	0	3
DST	0	0.487962	0.43	0.094	0	3
CD164	0	0.487917	0.387	0.059	0	3
VPS35	0	0.487801	0.378	0.061	0	3
HNRNPA0	0	0.486479	0.392	0.064	0	3
MRPS25	0	0.486109	0.373	0.053	0	3
MTUS2	0	0.486038	0.382	0.059	0	3
TMED10	0	0.484817	0.395	0.074	0	3
LAMA2	0	0.484657	0.417	0.086	0	3
AK2	0	0.484644	0.376	0.065	0	3
RALY	0	0.484621	0.417	0.086	0	3
ADPRHL1	0	0.484422	0.437	0.093	0	3
EIF3A	0	0.484324	0.374	0.057	0	3
P2RX1	0	0.484157	0.343	0.035	0	3
MRPL52	0	0.484104	0.467	0.117	0	3
LAMC1	0	0.483842	0.444	0.1	0	3
YWHAB	0	0.483221	0.397	0.063	0	3
IDH3B	0	0.482925	0.388	0.067	0	3
SRP9	0	0.482913	0.407	0.081	0	3
NARS1	0	0.482835	0.386	0.054	0	3
FBH1	0	0.48258	0.383	0.064	0	3
SF3B1	0	0.482216	0.396	0.07	0	3
AGL	0	0.482136	0.361	0.033	0	3
SGCB	0	0.48148	0.387	0.062	0	3
SMARCD3	0	0.481086	0.401	0.07	0	3
EIF5	0	0.480088	0.359	0.04	0	3
HAND2	0	0.480018	0.394	0.079	0	3
NDUFS3	0	0.479739	0.405	0.078	0	3
KLHDC8B	0	0.479387	0.396	0.068	0	3
PARM1	0	0.478697	0.354	0.037	0	3
PEA15	0	0.478249	0.465	0.112	0	3
APBB1	0	0.477926	0.377	0.068	0	3
PGM1	0	0.477469	0.384	0.064	0	3
CSNK2B	0	0.4774	0.402	0.087	0	3
RPN2	0	0.476472	0.392	0.069	0	3
NDFIP1	0	0.476178	0.384	0.056	0	3
DDX3X	0	0.476172	0.365	0.055	0	3
CCT6A	0	0.476124	0.388	0.064	0	3
GRSF1	0	0.475701	0.375	0.052	0	3
FXR1	0	0.475497	0.377	0.06	0	3
TOP2B	0	0.474818	0.38	0.058	0	3
AZIN1	0	0.474815	0.37	0.048	0	3
SPAG7	0	0.473891	0.403	0.073	0	3
MAP1LC3B	0	0.473771	0.413	0.087	0	3
XRCC5	0	0.473752	0.394	0.066	0	3
TMBIM6	0	0.473747	0.428	0.091	0	3
CLIC1	0	0.473722	0.414	0.086	0	3
PTP4A2	0	0.473508	0.385	0.064	0	3
C4orf3	0	0.473367	0.425	0.093	0	3
POPDC3	0	0.472963	0.373	0.058	0	3
GRHPR	0	0.472793	0.412	0.082	0	3
C14orf180	0	0.472646	0.391	0.079	0	3
MRPL23	0	0.472507	0.407	0.081	0	3
RBIS	0	0.471675	0.431	0.096	0	3
AK3	0	0.471027	0.369	0.059	0	3
PRXL2A	0	0.470551	0.366	0.05	0	3
MAP1B	0	0.46952	0.369	0.056	0	3
ATP6V1G1	0	0.4691	0.388	0.07	0	3
MRPL51	0	0.468554	0.428	0.101	0	3
GTF3A	0	0.467984	0.398	0.078	0	3
NISCH	0	0.467555	0.369	0.056	0	3
ARPC1A	0	0.466098	0.362	0.058	0	3
UBE2B	0	0.465826	0.383	0.07	0	3
PRMT1	0	0.465335	0.41	0.079	0	3
NDUFAF3	0	0.465288	0.443	0.109	0	3
HNRNPH3	0	0.464809	0.38	0.057	0	3
SH3GLB1	0	0.464476	0.405	0.085	0	3
ZNF664	0	0.46433	0.356	0.045	0	3
MRPS34	0	0.463666	0.397	0.074	0	3
CALM1	0	0.463629	0.414	0.099	0	3
LARP1	0	0.46343	0.359	0.049	0	3
MRPL57	0	0.463417	0.44	0.103	0	3
LAMTOR4	0	0.463249	0.433	0.103	0	3
JPH2	0	0.462895	0.361	0.06	0	3
COX7A2L	0	0.462381	0.374	0.064	0	3
TOP2A	0	0.462146	0.352	0.05	0	3
NHP2	0	0.461712	0.404	0.085	0	3
HMGA1	0	0.461701	0.363	0.048	0	3
MRPS6	0	0.461569	0.375	0.06	0	3
BAG1	0	0.461544	0.391	0.072	0	3
TBC1D4	0	0.461302	0.346	0.046	0	3
EIF4A1	0	0.461254	0.382	0.066	0	3
SRSF5	0	0.461209	0.387	0.08	0	3
POLD2	0	0.461054	0.402	0.082	0	3
YWHAH	0	0.460953	0.363	0.055	0	3
CACNA1C	0	0.459666	0.373	0.066	0	3
RHEB	0	0.459566	0.396	0.082	0	3
PSMD2	0	0.459435	0.387	0.073	0	3
NDUFS1	0	0.459307	0.39	0.067	0	3
CFL2	0	0.459022	0.39	0.084	0	3
SNRPE	0	0.458623	0.382	0.073	0	3
MRPS12	0	0.458603	0.379	0.057	0	3
PCMT1	0	0.45845	0.375	0.058	0	3
PPP1R16A	0	0.458181	0.418	0.094	0	3
MRPS36	0	0.456874	0.403	0.087	0	3
TCEA3	0	0.456542	0.375	0.072	0	3
SDHB	0	0.456208	0.389	0.078	0	3
STRAP	0	0.455735	0.376	0.061	0	3
MYO18B	0	0.454969	0.361	0.056	0	3
CYHR1	0	0.453747	0.372	0.06	0	3
PSMD8	0	0.453449	0.416	0.097	0	3
HLA-C	0	0.453247	0.437	0.105	0	3
DYNC1H1	0	0.453184	0.412	0.088	0	3
DEK	0	0.45311	0.368	0.062	0	3
ACAA2	0	0.453053	0.387	0.078	0	3
PRKACA	0	0.452914	0.387	0.072	0	3
CLUH	0	0.452782	0.355	0.051	0	3
SUGP2	0	0.452126	0.333	0.044	0	3
RHOA	0	0.451412	0.411	0.094	0	3
GOLIM4	0	0.451103	0.365	0.054	0	3
TCAP	0	0.45019	0.672	0.174	0	3
DMKN	0	0.449693	0.353	0.054	0	3
MAP2K2	0	0.44927	0.398	0.082	0	3
PPP2CA	0	0.448847	0.381	0.068	0	3
NCOA4	0	0.448774	0.369	0.058	0	3
NARF	0	0.448721	0.341	0.041	0	3
ARPC2	0	0.447934	0.385	0.077	0	3
PIN1	0	0.447932	0.4	0.093	0	3
KLHDC2	0	0.447514	0.357	0.062	0	3
ABCC5	0	0.447507	0.33	0.043	0	3
MLLT6	0	0.446811	0.318	0.034	0	3
CAPRIN1	0	0.446782	0.353	0.053	0	3
HNRNPD	0	0.446445	0.375	0.067	0	3
FZD1	0	0.446108	0.384	0.072	0	3
SMDT1	0	0.445521	0.435	0.103	0	3
DUSP3	0	0.445397	0.358	0.06	0	3
CAPZA2	0	0.445321	0.363	0.065	0	3
HNRNPM	0	0.445047	0.348	0.052	0	3
TMEM245	0	0.44419	0.344	0.04	0	3
SEM1	0	0.444178	0.407	0.093	0	3
COX20	0	0.443856	0.397	0.089	0	3
TMEM147	0	0.443796	0.359	0.056	0	3
ZNHIT1	0	0.443439	0.415	0.097	0	3
COBL	0	0.443335	0.35	0.051	0	3
ARPP19	0	0.442917	0.353	0.054	0	3
DBI	0	0.442651	0.551	0.138	0	3
DLAT	0	0.442115	0.35	0.046	0	3
DNAJC15	0	0.441854	0.389	0.082	0	3
DNAJB6	0	0.44184	0.353	0.055	0	3
TRIM24	0	0.441664	0.334	0.039	0	3
LAMA4	0	0.440723	0.447	0.109	0	3
POMGNT1	0	0.44026	0.36	0.064	0	3
IRX4	0	0.439827	0.314	0.026	0	3
VAPA	0	0.439643	0.372	0.073	0	3
APP	0	0.439606	0.37	0.068	0	3
TRIM54	0	0.43934	0.361	0.07	0	3
ATP6V1E1	0	0.438933	0.377	0.065	0	3
FASTK	0	0.438815	0.361	0.069	0	3
APEX1	0	0.438353	0.347	0.048	0	3
AP2S1	0	0.438305	0.401	0.091	0	3
LSM3	0	0.438162	0.405	0.089	0	3
SLC25A39	0	0.438034	0.356	0.052	0	3
FLOT2	0	0.437248	0.371	0.06	0	3
NUDC	0	0.437191	0.371	0.072	0	3
EIF3B	0	0.436448	0.35	0.054	0	3
UBE2M	0	0.43537	0.382	0.076	0	3
DLD	0	0.434725	0.38	0.072	0	3
RAB21	0	0.434396	0.364	0.064	0	3
DUSP5	0	0.433225	0.318	0.026	0	3
KLC1	0	0.433175	0.355	0.059	0	3
ZCCHC24	0	0.433068	0.339	0.049	0	3
USF2	0	0.432574	0.37	0.07	0	3
ZNF358	0	0.43248	0.387	0.085	0	3
BAG6	0	0.432136	0.357	0.064	0	3
RAB7A	0	0.43174	0.371	0.069	0	3
RTN3	0	0.431284	0.361	0.061	0	3
BRK1	0	0.430638	0.401	0.091	0	3
HP1BP3	0	0.430356	0.341	0.05	0	3
PREP	0	0.430329	0.335	0.044	0	3
CCNL2	0	0.430281	0.339	0.054	0	3
SEC11A	0	0.429204	0.357	0.064	0	3
RAB11A	0	0.428964	0.349	0.051	0	3
PDHB	0	0.428739	0.372	0.069	0	3
IPO5	0	0.428227	0.341	0.048	0	3
MAPK1IP1L	0	0.427727	0.345	0.05	0	3
DAAM1	0	0.427161	0.328	0.043	0	3
HNRNPF	0	0.427077	0.354	0.061	0	3
MRPS26	0	0.427009	0.359	0.068	0	3
RAB2A	0	0.425795	0.362	0.066	0	3
MT3	0	0.425534	0.313	0.038	0	3
SPCS2	0	0.425432	0.356	0.065	0	3
CAV1	0	0.42526	0.379	0.081	0	3
MRPL21	0	0.425165	0.347	0.066	0	3
PHLDB1	0	0.424889	0.336	0.056	0	3
NAB1	0	0.424887	0.317	0.032	0	3
ALKBH5	0	0.424666	0.345	0.049	0	3
SAMD4A	0	0.424435	0.336	0.057	0	3
ITM2C	0	0.42431	0.356	0.062	0	3
ATP6V0E1	0	0.424168	0.364	0.069	0	3
SMIM4	0	0.424087	0.37	0.068	0	3
UBE2D2	0	0.424049	0.38	0.078	0	3
COA1	0	0.423181	0.332	0.045	0	3
UBE2C	0	0.423132	0.317	0.04	0	3
TIMM17B	0	0.423	0.361	0.074	0	3
COPZ1	0	0.422726	0.372	0.077	0	3
RAPGEF1	0	0.422284	0.338	0.047	0	3
CYFIP2	0	0.422235	0.313	0.035	0	3
CDK6	0	0.422165	0.318	0.032	0	3
PSMC1	0	0.422065	0.374	0.07	0	3
EIF4G1	0	0.420753	0.358	0.072	0	3
MRPS7	0	0.420532	0.367	0.069	0	3
CCT2	0	0.420183	0.353	0.056	0	3
CSRP2	0	0.419933	0.353	0.069	0	3
FILIP1	0	0.419845	0.338	0.052	0	3
MTX2	0	0.419638	0.325	0.039	0	3
RPS19BP1	0	0.419577	0.36	0.07	0	3
TRIM55	0	0.419174	0.333	0.042	0	3
PAIP2	0	0.419075	0.368	0.073	0	3
GGA2	0	0.418628	0.307	0.03	0	3
CTDSP1	0	0.41805	0.345	0.061	0	3
SMS	0	0.417823	0.331	0.047	0	3
FUNDC2	0	0.417724	0.359	0.073	0	3
HIF1A	0	0.416879	0.328	0.053	0	3
FH	0	0.416747	0.352	0.065	0	3
MIDN	0	0.416266	0.315	0.033	0	3
CASZ1	0	0.416211	0.324	0.06	0	3
HIPK3	0	0.416082	0.345	0.063	0	3
PDK1	0	0.416027	0.301	0.022	0	3
PRADC1	0	0.415949	0.349	0.059	0	3
PPFIA4	0	0.415711	0.301	0.026	0	3
SLC20A2	0	0.415472	0.338	0.048	0	3
TAPBP	0	0.415248	0.369	0.077	0	3
SLC38A2	0	0.415097	0.36	0.066	0	3
UBE2I	0	0.413715	0.368	0.07	0	3
SSU72	0	0.413489	0.356	0.071	0	3
GSTO1	0	0.413423	0.359	0.067	0	3
AKAP13	0	0.413392	0.359	0.069	0	3
RCSD1	0	0.413246	0.325	0.035	0	3
A4GALT	0	0.413036	0.334	0.05	0	3
SPEG	0	0.412904	0.348	0.068	0	3
SAT2	0	0.412101	0.343	0.059	0	3
DNAJB2	0	0.411916	0.317	0.04	0	3
PSMD4	0	0.411208	0.368	0.064	0	3
DAZAP1	0	0.410701	0.327	0.046	0	3
MBD3	0	0.410597	0.334	0.058	0	3
PRPF8	0	0.410352	0.361	0.073	0	3
RNF150	0	0.409314	0.339	0.055	0	3
MLYCD	0	0.409209	0.33	0.047	0	3
ATP11A	0	0.408717	0.316	0.042	0	3
SYMPK	0	0.408361	0.322	0.058	0	3
CIB2	0	0.40812	0.34	0.066	0	3
KPNB1	0	0.407982	0.34	0.062	0	3
KCNMB4	0	0.407613	0.319	0.042	0	3
SUCLA2	0	0.407273	0.329	0.045	0	3
ZFP36L2	0	0.40726	0.353	0.071	0	3
EIF3D	0	0.407199	0.318	0.051	0	3
MRPS5	0	0.40698	0.319	0.044	0	3
JPT1	0	0.406672	0.323	0.048	0	3
EIF4EBP2	0	0.406602	0.335	0.054	0	3
EVL	0	0.40645	0.333	0.053	0	3
ANKRD10	0	0.406016	0.313	0.044	0	3
HIPK2	0	0.405852	0.303	0.03	0	3
DDOST	0	0.405813	0.352	0.065	0	3
PSMB2	0	0.405528	0.35	0.067	0	3
FDPS	0	0.405346	0.336	0.054	0	3
ACTR10	0	0.40524	0.314	0.05	0	3
IMPDH2	0	0.404941	0.333	0.051	0	3
BAG3	0	0.404937	0.33	0.05	0	3
POLR1D	0	0.403398	0.364	0.076	0	3
RAD23B	0	0.403124	0.328	0.054	0	3
CALD1	0	0.40188	0.336	0.06	0	3
GSPT1	0	0.401469	0.312	0.038	0	3
GRINA	0	0.401387	0.325	0.051	0	3
TIA1	0	0.400129	0.318	0.046	0	3
CPNE3	0	0.400114	0.318	0.043	0	3
CYP2J2	0	0.400052	0.333	0.061	0	3
PRRC2B	0	0.400017	0.334	0.055	0	3
MBTPS1	0	0.399996	0.325	0.046	0	3
IST1	0	0.399543	0.322	0.051	0	3
CDV3	0	0.399231	0.325	0.045	0	3
RANGAP1	0	0.39922	0.318	0.044	0	3
LRPPRC	0	0.398424	0.302	0.035	0	3
EIF3I	0	0.398178	0.339	0.06	0	3
TCP1	0	0.397695	0.34	0.062	0	3
PUF60	0	0.397562	0.329	0.062	0	3
CTSA	0	0.396761	0.32	0.053	0	3
STK25	0	0.396414	0.338	0.057	0	3
WLS	0	0.396182	0.341	0.063	0	3
PCNA	0	0.3955	0.317	0.054	0	3
OGT	0	0.394921	0.32	0.056	0	3
C1QBP	0	0.394583	0.346	0.06	0	3
AKR1A1	0	0.394462	0.335	0.056	0	3
HDGF	0	0.394358	0.334	0.052	0	3
ATP6V0D1	0	0.393832	0.327	0.058	0	3
WASH6P	0	0.393654	0.314	0.051	0	3
PA2G4	0	0.393422	0.324	0.051	0	3
SLC25A23	0	0.392451	0.341	0.065	0	3
MTARC2	0	0.392431	0.313	0.042	0	3
CMC2	0	0.391604	0.334	0.059	0	3
MAPRE1	0	0.391208	0.316	0.04	0	3
PPP2CB	0	0.391188	0.328	0.057	0	3
EFNB3	0	0.390143	0.298	0.028	0	3
LONP1	0	0.389755	0.317	0.055	0	3
TP53INP2	0	0.389319	0.315	0.043	0	3
EMP2	0	0.388998	0.325	0.061	0	3
LRRFIP2	0	0.388418	0.316	0.054	0	3
SERINC1	0	0.387812	0.322	0.056	0	3
CDIPT	0	0.387704	0.32	0.057	0	3
PARP1	0	0.387479	0.347	0.067	0	3
MARCHF6	0	0.38717	0.328	0.054	0	3
RBBP7	0	0.386888	0.34	0.065	0	3
CKS1B	0	0.386537	0.298	0.041	0	3
SEC23A	0	0.386147	0.315	0.043	0	3
CTDNEP1	0	0.386063	0.329	0.062	0	3
SLC4A2	0	0.386031	0.303	0.041	0	3
RBM5	0	0.385916	0.309	0.046	0	3
MRPL14	0	0.385308	0.322	0.059	0	3
PAIP1	0	0.384939	0.312	0.051	0	3
ASB2	0	0.384742	0.322	0.053	0	3
RAB1A	0	0.384721	0.331	0.058	0	3
RABL6	0	0.384659	0.317	0.054	0	3
OSTC	0	0.384239	0.322	0.054	0	3
C22orf39	0	0.383254	0.325	0.055	0	3
CLTA	0	0.383086	0.326	0.061	0	3
ATP6AP1	0	0.382468	0.333	0.063	0	3
INSR	0	0.382424	0.303	0.048	0	3
KIF1B	0	0.381673	0.317	0.047	0	3
PALM2AKAP2	0	0.380799	0.324	0.049	0	3
LRIG1	0	0.380629	0.297	0.046	0	3
CUX1	0	0.380612	0.341	0.067	0	3
PLEKHA7	0	0.380461	0.308	0.046	0	3
HSDL2	0	0.380079	0.308	0.05	0	3
TMED2	0	0.379979	0.308	0.044	0	3
RPL7L1	0	0.379821	0.304	0.044	0	3
ARMCX3	0	0.379282	0.295	0.039	0	3
KIF21A	0	0.378735	0.291	0.041	0	3
AP3D1	0	0.378602	0.304	0.048	0	3
LRATD2	0	0.378487	0.292	0.032	0	3
PCNP	0	0.378245	0.309	0.052	0	3
KLHL24	0	0.377539	0.321	0.057	0	3
SLC1A3	0	0.377455	0.293	0.035	0	3
ANK2	0	0.376672	0.31	0.052	0	3
MCRS1	0	0.376447	0.303	0.048	0	3
ANP32B	0	0.37585	0.308	0.051	0	3
TTC3	0	0.375424	0.313	0.051	0	3
ARF4	0	0.375236	0.314	0.057	0	3
XPO1	0	0.375033	0.307	0.049	0	3
SLC30A3	0	0.374952	0.272	0.026	0	3
PAFAH1B1	0	0.374775	0.315	0.051	0	3
STK11	0	0.37454	0.296	0.045	0	3
VCAN	0	0.374424	0.303	0.052	0	3
TFG	0	0.374181	0.309	0.054	0	3
UBE2E1	0	0.374129	0.296	0.045	0	3
TLCD4	0	0.373628	0.301	0.043	0	3
PRRC2A	0	0.373529	0.309	0.05	0	3
EDNRA	0	0.373306	0.289	0.036	0	3
CSNK1E	0	0.373292	0.289	0.044	0	3
COL7A1	0	0.373216	0.272	0.038	0	3
AKAP6	0	0.372951	0.304	0.046	0	3
NDUFA9	0	0.372609	0.312	0.056	0	3
TSPYL1	0	0.372534	0.302	0.045	0	3
ABI2	0	0.372121	0.29	0.037	0	3
ANLN	0	0.371106	0.285	0.037	0	3
SDCBP	0	0.370854	0.289	0.04	0	3
PACS2	0	0.369854	0.29	0.046	0	3
TUBA1C	0	0.369511	0.284	0.043	0	3
CDCA7L	0	0.369142	0.29	0.033	0	3
SELENOT	0	0.368668	0.29	0.042	0	3
PNN	0	0.367547	0.283	0.038	0	3
ZFAND6	0	0.367435	0.299	0.048	0	3
SLC16A1	0	0.366738	0.312	0.056	0	3
SCOC	0	0.366479	0.294	0.042	0	3
ACP1	0	0.366438	0.295	0.05	0	3
PNISR	0	0.366211	0.289	0.04	0	3
C6orf62	0	0.366181	0.283	0.035	0	3
CTBP1	0	0.365994	0.283	0.044	0	3
DIPK1B	0	0.365949	0.277	0.027	0	3
CDK1	0	0.364634	0.278	0.033	0	3
STAU1	0	0.364159	0.293	0.038	0	3
AUTS2	0	0.36388	0.261	0.016	0	3
COPA	0	0.363338	0.296	0.049	0	3
CSE1L	0	0.363294	0.288	0.037	0	3
REEP3	0	0.363142	0.289	0.039	0	3
SUGT1	0	0.362267	0.281	0.037	0	3
TMEM123	0	0.360382	0.287	0.041	0	3
HRH2	0	0.359739	0.277	0.039	0	3
CGNL1	0	0.358502	0.279	0.035	0	3
G3BP1	0	0.358344	0.275	0.036	0	3
NRDC	0	0.358203	0.285	0.039	0	3
TIAL1	0	0.358163	0.28	0.041	0	3
CIAO2A	0	0.358118	0.277	0.039	0	3
TRAP1	0	0.358079	0.291	0.04	0	3
GPX7	0	0.357866	0.292	0.043	0	3
STRN	0	0.357684	0.302	0.047	0	3
GNG12	0	0.357582	0.278	0.036	0	3
NAMPT	0	0.356912	0.286	0.038	0	3
NDRG4	0	0.356354	0.289	0.048	0	3
CXADR	0	0.356183	0.287	0.039	0	3
YAP1	0	0.355801	0.285	0.042	0	3
CXXC5	0	0.355659	0.285	0.044	0	3
ADGRB2	0	0.355031	0.277	0.041	0	3
EPS15	0	0.354729	0.29	0.044	0	3
PRICKLE1	0	0.353312	0.283	0.037	0	3
USP2	0	0.353212	0.272	0.038	0	3
DENND5B	0	0.352896	0.272	0.034	0	3
CACYBP	0	0.352596	0.292	0.046	0	3
PTCD3	0	0.35248	0.275	0.035	0	3
ECHDC2	0	0.352146	0.284	0.046	0	3
LARS1	0	0.351935	0.276	0.037	0	3
SRSF7	0	0.35169	0.273	0.038	0	3
NOTCH2	0	0.351662	0.294	0.044	0	3
PPP5C	0	0.351401	0.297	0.049	0	3
TMEM167A	0	0.351275	0.286	0.038	0	3
CHTOP	0	0.35044	0.283	0.039	0	3
DAP3	0	0.350052	0.28	0.035	0	3
DGLUCY	0	0.350012	0.303	0.053	0	3
PSD3	0	0.349779	0.273	0.034	0	3
MPDZ	0	0.349725	0.299	0.051	0	3
LYPLA1	0	0.349572	0.274	0.032	0	3
SAE1	0	0.349552	0.295	0.049	0	3
NSD2	0	0.349325	0.278	0.035	0	3
FUBP1	0	0.349164	0.274	0.042	0	3
AGPAT1	0	0.349052	0.285	0.041	0	3
PGRMC1	0	0.348384	0.28	0.035	0	3
SNX6	0	0.348379	0.279	0.043	0	3
COLQ	0	0.348297	0.254	0.024	0	3
GOLGA8A	0	0.345948	0.262	0.029	0	3
DHFR	0	0.345926	0.267	0.029	0	3
BIRC5	0	0.345863	0.264	0.028	0	3
FAM168B	0	0.345737	0.267	0.034	0	3
GJA3	0	0.345633	0.275	0.036	0	3
UBR3	0	0.345205	0.282	0.041	0	3
ACSS2	0	0.344577	0.288	0.043	0	3
ADNP	0	0.343721	0.271	0.038	0	3
HMGA2	0	0.343568	0.241	0.012	0	3
TARDBP	0	0.343489	0.288	0.042	0	3
USP28	0	0.343381	0.278	0.041	0	3
TRMU	0	0.342477	0.263	0.032	0	3
PRKDC	0	0.342068	0.264	0.038	0	3
IGF2BP2	0	0.34164	0.268	0.033	0	3
CCNB1	0	0.341631	0.256	0.026	0	3
KIF26B	0	0.341561	0.269	0.028	0	3
NT5C	0	0.34139	0.282	0.045	0	3
PI4KA	0	0.34134	0.282	0.044	0	3
TSC22D2	0	0.341061	0.266	0.029	0	3
FAM95C	0	0.340781	0.25	0.023	0	3
TMX2	0	0.340646	0.269	0.034	0	3
TTYH3	0	0.340603	0.25	0.022	0	3
KAT2A	0	0.340569	0.258	0.028	0	3
PPP2R5A	0	0.34047	0.27	0.033	0	3
SSB	0	0.34025	0.277	0.044	0	3
DNM2	0	0.340101	0.274	0.042	0	3
ST6GAL1	0	0.339973	0.262	0.034	0	3
TIMM44	0	0.339833	0.273	0.039	0	3
NRP1	0	0.338993	0.284	0.045	0	3
TRPM4	0	0.338988	0.262	0.038	0	3
MAPK1	0	0.338835	0.269	0.036	0	3
OLA1	0	0.338229	0.264	0.037	0	3
MARCKSL1	0	0.338087	0.273	0.038	0	3
ANXA3	0	0.33652	0.269	0.036	0	3
CDC25B	0	0.336503	0.254	0.026	0	3
ABR	0	0.336064	0.288	0.047	0	3
KIF1A	0	0.335793	0.279	0.044	0	3
FABP5	0	0.33547	0.262	0.036	0	3
SLC2A4	0	0.335019	0.258	0.035	0	3
SLC16A3	0	0.334967	0.258	0.023	0	3
MARCHF7	0	0.333399	0.273	0.039	0	3
SLC2A1	0	0.332467	0.248	0.021	0	3
MAGEF1	0	0.332392	0.265	0.037	0	3
EPM2AIP1	0	0.331954	0.266	0.035	0	3
GUCD1	0	0.331274	0.273	0.042	0	3
MCM5	0	0.330869	0.26	0.035	0	3
FBL	0	0.33065	0.271	0.038	0	3
SRSF10	0	0.330497	0.262	0.038	0	3
CHKA	0	0.330399	0.243	0.023	0	3
GM2A	0	0.328933	0.251	0.028	0	3
ADSL	0	0.328654	0.268	0.039	0	3
RSL1D1	0	0.328371	0.253	0.035	0	3
NPEPPS	0	0.328013	0.256	0.034	0	3
PYGL	0	0.326637	0.253	0.029	0	3
PGD	0	0.326372	0.252	0.031	0	3
PRKAR2A	0	0.326285	0.26	0.026	0	3
GPRIN3	0	0.326118	0.253	0.034	0	3
INAFM2	0	0.32567	0.258	0.029	0	3
HMOX2	0	0.325182	0.266	0.039	0	3
BMPR2	0	0.324766	0.262	0.037	0	3
PMEPA1	0	0.323693	0.251	0.029	0	3
HAND1	0	0.323648	0.253	0.031	0	3
LSM14A	0	0.323178	0.247	0.032	0	3
FAM171A1	0	0.322522	0.25	0.029	0	3
FSCN1	0	0.322337	0.26	0.038	0	3
FGF1	0	0.321796	0.25	0.029	0	3
CFLAR	0	0.320817	0.254	0.036	0	3
TSPAN13	0	0.320661	0.239	0.023	0	3
FREM2	0	0.320272	0.236	0.02	0	3
SIRPA	0	0.319949	0.24	0.021	0	3
ARL8B	0	0.319358	0.261	0.038	0	3
NAT14	0	0.318661	0.249	0.031	0	3
MICAL2	0	0.318643	0.246	0.031	0	3
PAICS	0	0.318553	0.242	0.024	0	3
MAEA	0	0.318014	0.248	0.03	0	3
DHRS3	0	0.317637	0.241	0.027	0	3
HSDL1	0	0.317251	0.237	0.022	0	3
XPR1	0	0.317034	0.253	0.033	0	3
STX16	0	0.316898	0.239	0.024	0	3
UBE2G1	0	0.31671	0.256	0.034	0	3
HEY2	0	0.316696	0.221	0.015	0	3
DDX39A	0	0.315918	0.252	0.03	0	3
UTRN	0	0.314665	0.243	0.028	0	3
KLHL21	0	0.313362	0.25	0.034	0	3
ADAMTS8	0	0.312649	0.216	0.013	0	3
MYOCD	0	0.312429	0.232	0.021	0	3
NME2	0	0.311328	0.215	0.009	0	3
MCM4	0	0.311189	0.231	0.027	0	3
FAM78A	0	0.310626	0.239	0.03	0	3
ZMYM2	0	0.309537	0.239	0.028	0	3
NBAS	0	0.309432	0.241	0.03	0	3
AFDN	0	0.309209	0.246	0.031	0	3
PHF10	0	0.308244	0.244	0.031	0	3
CENPF	0	0.30714	0.236	0.029	0	3
HSPH1	0	0.30692	0.237	0.028	0	3
MAN1C1	0	0.305691	0.233	0.029	0	3
SFXN4	0	0.305525	0.232	0.026	0	3
BUD23	0	0.304129	0.252	0.034	0	3
LLGL2	0	0.302497	0.234	0.027	0	3
SORT1	0	0.30219	0.239	0.03	0	3
ODC1	0	0.301908	0.235	0.03	0	3
RSRP1	0	0.301804	0.232	0.024	0	3
GGCT	0	0.299472	0.237	0.029	0	3
SHC2	0	0.299154	0.231	0.027	0	3
PANK3	0	0.297365	0.244	0.033	0	3
RBM14	0	0.295223	0.223	0.023	0	3
SPOCK1	0	0.292692	0.223	0.024	0	3
RAB10	0	0.291697	0.225	0.024	0	3
RANBP2	0	0.290946	0.232	0.029	0	3
IQSEC1	0	0.290891	0.228	0.027	0	3
WWP1	0	0.290873	0.224	0.025	0	3
ACYP1	0	0.290859	0.23	0.027	0	3
ZBTB44	0	0.289723	0.223	0.026	0	3
HES1	0	0.288788	0.213	0.023	0	3
AKIRIN1	0	0.288208	0.221	0.021	0	3
SAMD1	0	0.287617	0.232	0.027	0	3
FZD2	0	0.287328	0.223	0.024	0	3
DGKH	0	0.284723	0.216	0.021	0	3
ARL5B	0	0.28302	0.219	0.022	0	3
COL9A1	0	0.281274	0.223	0.025	0	3
FRAS1	0	0.280502	0.223	0.025	0	3
HMGB3	0	0.280172	0.216	0.024	0	3
GOLGA8B	0	0.279571	0.204	0.019	0	3
PDGFD	0	0.27579	0.202	0.017	0	3
DESI1	0	0.275294	0.216	0.024	0	3
GMNN	0	0.273962	0.213	0.024	0	3
BUB1	0	0.27078	0.208	0.021	0	3
SKIL	0	0.268874	0.206	0.019	0	3
AURKA	0	0.268411	0.196	0.013	0	3
FASTKD1	0	0.267184	0.206	0.02	0	3
TMEM38A	0	0.2659	0.2	0.016	0	3
ANKZF1	0	0.265745	0.212	0.024	0	3
FRMD3	0	0.263403	0.205	0.02	0	3
CCDC141	0	0.262432	0.203	0.021	0	3
JPT2	0	0.261809	0.21	0.023	0	3
TMEM132A	0	0.260695	0.196	0.017	0	3
DEPDC1	0	0.254734	0.186	0.015	0	3
TSPAN32	0	0.250687	0.185	0.015	0	3
OTUB1	6.96866e-308	0.358522	0.3	0.052	1.80704e-303	3
HDAC2	7.83511e-308	0.343665	0.277	0.044	2.03172e-303	3
FAM219B	1.21822e-307	0.313607	0.256	0.037	3.15896e-303	3
ADIPOR1	1.27439e-307	0.36659	0.284	0.047	3.30463e-303	3
PLXNA1	1.61783e-307	0.312239	0.253	0.036	4.19519e-303	3
ACAA1	2.08112e-307	0.332244	0.283	0.046	5.39654e-303	3
SF3B6	5.47638e-307	0.412534	0.368	0.078	1.42008e-302	3
MKRN1	5.70379e-307	0.36333	0.309	0.056	1.47905e-302	3
MSL1	8.8965e-307	0.300555	0.243	0.033	2.30695e-302	3
POLR2B	1.15722e-306	0.316809	0.263	0.039	3.00078e-302	3
RBM8A	2.39547e-306	0.372606	0.315	0.058	6.2117e-302	3
PRELID1	2.66047e-306	0.395369	0.349	0.071	6.89886e-302	3
SSNA1	3.42569e-306	0.387442	0.341	0.068	8.88317e-302	3
KLF13	6.26133e-306	0.257352	0.202	0.021	1.62362e-301	3
ACTG1	7.99079e-306	0.4907	0.565	0.162	2.07209e-301	3
TSC22D3	1.06747e-305	0.285563	0.226	0.028	2.76805e-301	3
NOP10	1.80044e-305	0.446253	0.453	0.112	4.66872e-301	3
NFYC	2.2744e-305	0.337049	0.271	0.042	5.89776e-301	3
ROGDI	2.60662e-305	0.387935	0.346	0.07	6.75923e-301	3
ATXN7L3B	3.35458e-305	0.266777	0.212	0.024	8.69877e-301	3
RBMS1	3.37792e-305	0.316924	0.257	0.038	8.75929e-301	3
PPP6R3	4.07389e-305	0.290574	0.245	0.034	1.0564e-300	3
PLEKHM2	5.13245e-305	0.359474	0.291	0.05	1.3309e-300	3
HADH	5.71009e-305	0.394586	0.342	0.069	1.48068e-300	3
SSR2	7.0858e-305	0.409887	0.379	0.083	1.83742e-300	3
CAPZA1	7.38852e-305	0.292394	0.237	0.031	1.91592e-300	3
PDHX	7.93154e-305	0.313061	0.254	0.037	2.05673e-300	3
COPE	1.0317e-304	0.424767	0.374	0.082	2.6753e-300	3
RAD21	1.04548e-304	0.366754	0.314	0.058	2.71103e-300	3
PDCD6IP	1.16146e-304	0.322233	0.256	0.038	3.01178e-300	3
UPF3A	1.23715e-304	0.305348	0.24	0.033	3.20806e-300	3
KDM1A	1.40063e-304	0.288978	0.229	0.029	3.63197e-300	3
POLR2J	2.07664e-304	0.451357	0.438	0.108	5.38493e-300	3
OGA	2.152e-304	0.343314	0.289	0.049	5.58034e-300	3
PTPA	2.24047e-304	0.379623	0.328	0.063	5.80977e-300	3
GLRX5	2.34474e-304	0.36367	0.312	0.057	6.08015e-300	3
RAMP1	2.94411e-304	0.459654	0.476	0.123	7.63437e-300	3
ACTR1A	3.16866e-304	0.341189	0.283	0.047	8.21665e-300	3
SLC25A36	4.55176e-304	0.317493	0.256	0.038	1.18032e-299	3
BTBD1	1.35977e-303	0.25177	0.192	0.019	3.52602e-299	3
PLCXD1	1.38551e-303	0.261397	0.189	0.018	3.59278e-299	3
MRPL28	1.62921e-303	0.407811	0.348	0.071	4.2247e-299	3
PLCL2	1.64341e-303	0.348018	0.272	0.043	4.26153e-299	3
ACSL3	2.38447e-303	0.30529	0.241	0.033	6.18317e-299	3
SLK	2.45273e-303	0.327277	0.254	0.037	6.36019e-299	3
UBE2G2	3.01924e-303	0.301597	0.234	0.031	7.82919e-299	3
SAR1A	3.11749e-303	0.335542	0.273	0.043	8.08396e-299	3
ST3GAL6	7.86428e-303	0.26223	0.203	0.022	2.03929e-298	3
SGTA	1.07976e-302	0.359797	0.303	0.054	2.79993e-298	3
USP13	2.72709e-302	0.275876	0.226	0.028	7.07162e-298	3
ERP29	5.63437e-302	0.410444	0.354	0.074	1.46105e-297	3
SOX12	6.42814e-302	0.27973	0.217	0.026	1.66688e-297	3
GOT2	6.81073e-302	0.41119	0.349	0.073	1.76609e-297	3
ZRANB2	1.33965e-301	0.301046	0.227	0.029	3.47385e-297	3
DHX9	1.70022e-301	0.317584	0.259	0.039	4.40885e-297	3
SEC31A	2.53614e-301	0.332495	0.274	0.044	6.57646e-297	3
CHPF	3.2989e-301	0.435737	0.404	0.096	8.55437e-297	3
RAB6A	8.83801e-301	0.313331	0.26	0.039	2.29178e-296	3
NOSIP	1.06146e-300	0.36784	0.32	0.061	2.75246e-296	3
ISOC1	1.31032e-300	0.344187	0.283	0.047	3.39779e-296	3
AGRN	1.35371e-300	0.289139	0.231	0.03	3.51031e-296	3
CPSF6	1.70685e-300	0.313349	0.234	0.031	4.42603e-296	3
NUDT16L1	4.57351e-300	0.356027	0.289	0.05	1.18596e-295	3
SNRNP200	9.51462e-300	0.351109	0.287	0.049	2.46724e-295	3
CPT1A	1.09113e-299	0.279749	0.226	0.029	2.8294e-295	3
INTS11	1.39722e-299	0.36553	0.288	0.049	3.62314e-295	3
PKIA	2.0551e-299	0.353038	0.3	0.054	5.32909e-295	3
PSMC5	4.97799e-299	0.398974	0.353	0.074	1.29084e-294	3
PICALM	5.5778e-299	0.302411	0.253	0.037	1.44638e-294	3
SDHD	5.9992e-299	0.377466	0.334	0.066	1.55565e-294	3
TM9SF3	8.18667e-299	0.350266	0.287	0.049	2.12289e-294	3
ELOC	1.00373e-298	0.423195	0.375	0.084	2.60277e-294	3
PLD3	1.07629e-298	0.465792	0.442	0.114	2.79092e-294	3
COPS6	1.82255e-298	0.394758	0.35	0.074	4.72607e-294	3
PSMC6	2.54814e-298	0.365815	0.3	0.054	6.60759e-294	3
MTCH2	7.08847e-298	0.310058	0.26	0.04	1.83811e-293	3
SEMA5B	7.98706e-298	0.27592	0.221	0.027	2.07112e-293	3
RNF11	9.89968e-298	0.350091	0.283	0.048	2.56709e-293	3
RERE	1.77793e-297	0.344793	0.292	0.051	4.61036e-293	3
MSRB3	2.98364e-297	0.320841	0.267	0.042	7.73687e-293	3
RMND5A	3.52086e-297	0.346257	0.296	0.052	9.12993e-293	3
RGS3	5.05887e-297	0.366776	0.321	0.062	1.31182e-292	3
ACOT13	6.2871e-297	0.313053	0.257	0.039	1.63031e-292	3
PSMA4	6.91695e-297	0.389809	0.341	0.07	1.79363e-292	3
SFXN1	7.84609e-297	0.264754	0.207	0.024	2.03457e-292	3
FLNA	1.04146e-296	0.484053	0.418	0.104	2.70061e-292	3
UQCC3	1.2958e-296	0.304499	0.253	0.038	3.36013e-292	3
FKBP4	2.02281e-296	0.308021	0.252	0.037	5.24536e-292	3
HUWE1	2.24912e-296	0.343336	0.293	0.052	5.8322e-292	3
TJP1	2.39279e-296	0.322557	0.274	0.045	6.20474e-292	3
RNF7	2.54846e-296	0.406641	0.349	0.073	6.60842e-292	3
COL16A1	2.76446e-296	0.382542	0.325	0.064	7.16853e-292	3
DAD1	2.99351e-296	0.405102	0.368	0.081	7.76247e-292	3
GLRX3	6.73287e-296	0.309753	0.257	0.039	1.7459e-291	3
ZDHHC7	6.91715e-296	0.259785	0.21	0.025	1.79369e-291	3
CPNE5	9.13731e-296	0.313135	0.244	0.035	2.36939e-291	3
A2M	1.06945e-295	0.451295	0.548	0.155	2.7732e-291	3
WDR1	1.12853e-295	0.386538	0.34	0.07	2.92639e-291	3
DDT	1.25704e-295	0.397406	0.355	0.076	3.25963e-291	3
CCNY	1.87248e-295	0.30591	0.25	0.037	4.85554e-291	3
NCOR2	1.88036e-295	0.324736	0.273	0.044	4.87597e-291	3
MRPL20	2.52544e-295	0.422166	0.394	0.092	6.54872e-291	3
RAPGEF2	3.53633e-295	0.259433	0.198	0.022	9.17006e-291	3
PSMC3	4.09422e-295	0.430748	0.381	0.088	1.06167e-290	3
JUP	4.61308e-295	0.434276	0.399	0.095	1.19622e-290	3
LAMP2	4.71721e-295	0.30168	0.253	0.038	1.22322e-290	3
ATAD1	5.64722e-295	0.2649	0.216	0.026	1.46438e-290	3
RNF167	5.90502e-295	0.325959	0.275	0.045	1.53123e-290	3
GYS1	9.81146e-295	0.300058	0.246	0.035	2.54421e-290	3
CHCHD3	2.64601e-294	0.337277	0.279	0.047	6.86137e-290	3
ST6GALNAC4	2.773e-294	0.271348	0.222	0.028	7.19067e-290	3
VAT1	5.63156e-294	0.321029	0.257	0.04	1.46032e-289	3
TAF9	5.94684e-294	0.297656	0.23	0.031	1.54208e-289	3
LAMTOR1	6.98117e-294	0.386905	0.36	0.078	1.81029e-289	3
MTLN	7.44011e-294	0.432181	0.432	0.108	1.92929e-289	3
KCMF1	1.06603e-293	0.259063	0.203	0.023	2.76432e-289	3
TNFRSF19	1.17679e-293	0.289956	0.231	0.031	3.05153e-289	3
UCKL1	1.18809e-293	0.33213	0.271	0.044	3.08084e-289	3
SMARCA1	1.40457e-293	0.300348	0.25	0.037	3.64218e-289	3
IARS2	6.96404e-293	0.314368	0.256	0.039	1.80584e-288	3
C5orf24	1.0443e-292	0.257674	0.203	0.023	2.70796e-288	3
ERI3	1.26857e-292	0.342767	0.282	0.048	3.28953e-288	3
ZYX	1.27648e-292	0.366222	0.325	0.064	3.31004e-288	3
ANAPC5	1.52962e-292	0.306727	0.245	0.036	3.96644e-288	3
TSC22D4	2.0767e-292	0.337252	0.287	0.05	5.38509e-288	3
SFRP1	2.86865e-292	0.415633	0.394	0.092	7.4387e-288	3
IMMP1L	3.05361e-292	0.351864	0.298	0.054	7.91831e-288	3
MIEN1	3.58569e-292	0.367664	0.31	0.059	9.29806e-288	3
STIP1	4.20028e-292	0.318973	0.267	0.043	1.08917e-287	3
CAV2	4.52126e-292	0.40775	0.364	0.08	1.17241e-287	3
SSBP1	6.12987e-292	0.377792	0.332	0.067	1.58954e-287	3
EIF1AX	9.3581e-292	0.328459	0.277	0.046	2.42665e-287	3
UBA1	1.85483e-291	0.38466	0.341	0.071	4.80977e-287	3
C11orf58	2.4758e-291	0.395303	0.348	0.074	6.42e-287	3
ENTPD6	3.36976e-291	0.323333	0.249	0.037	8.73811e-287	3
GLG1	3.42345e-291	0.377875	0.349	0.074	8.87735e-287	3
ALDH3A2	3.78845e-291	0.315882	0.261	0.041	9.82382e-287	3
DCTN2	4.85125e-291	0.371864	0.315	0.061	1.25798e-286	3
NT5C2	6.09762e-291	0.294621	0.232	0.032	1.58117e-286	3
FLOT1	8.08623e-291	0.441434	0.419	0.104	2.09684e-286	3
RIPOR1	8.19911e-291	0.312283	0.242	0.035	2.12611e-286	3
ICMT	1.02047e-290	0.279927	0.217	0.027	2.64619e-286	3
EMC6	1.04063e-290	0.391234	0.347	0.074	2.69846e-286	3
TNK2	1.091e-290	0.261542	0.202	0.023	2.82908e-286	3
ITGB1BP1	1.22667e-290	0.393595	0.346	0.073	3.18088e-286	3
PDXK	4.16787e-290	0.304159	0.243	0.035	1.08077e-285	3
SLC39A14	4.33679e-290	0.30965	0.262	0.042	1.12457e-285	3
DMD	1.40262e-289	0.310432	0.259	0.041	3.63713e-285	3
CHP1	3.43438e-289	0.279572	0.223	0.029	8.90569e-285	3
TNNT1	4.02531e-289	0.358834	0.29	0.052	1.0438e-284	3
SAFB	4.30268e-289	0.334062	0.264	0.043	1.11573e-284	3
CDH2	4.83349e-289	0.609069	0.535	0.179	1.25337e-284	3
MYADM	5.4197e-289	0.284085	0.238	0.034	1.40538e-284	3
NXF1	7.54706e-289	0.264959	0.204	0.024	1.95703e-284	3
TRMT112	9.98598e-289	0.415295	0.414	0.101	2.58947e-284	3
SKA2	1.19134e-288	0.309558	0.254	0.039	3.08926e-284	3
NSUN5	2.11718e-288	0.270057	0.211	0.026	5.49006e-284	3
CD59	2.96121e-288	0.403077	0.36	0.08	7.67872e-284	3
TSPAN18	4.41407e-288	0.322017	0.263	0.042	1.14461e-283	3
BTF3L4	7.92873e-288	0.306103	0.251	0.038	2.056e-283	3
PTDSS2	8.08054e-288	0.289615	0.227	0.031	2.09537e-283	3
MTSS1	1.24215e-287	0.266478	0.207	0.025	3.22102e-283	3
TRIM47	2.67704e-287	0.303003	0.247	0.037	6.94184e-283	3
NUDCD3	3.37811e-287	0.309864	0.24	0.035	8.75977e-283	3
SRSF11	3.47827e-287	0.357717	0.307	0.058	9.01951e-283	3
B3GALNT1	5.8569e-287	0.329828	0.264	0.043	1.51875e-282	3
STARD4	9.82561e-287	0.300239	0.252	0.039	2.54788e-282	3
RGL2	1.58444e-286	0.27276	0.214	0.027	4.10861e-282	3
RNF115	2.64562e-286	0.310374	0.262	0.042	6.86036e-282	3
NSMF	6.18092e-286	0.250824	0.192	0.021	1.60277e-281	3
CHURC1	8.32262e-286	0.377035	0.335	0.07	2.15814e-281	3
TMEM230	1.35234e-285	0.333247	0.289	0.052	3.50674e-281	3
MRPL36	3.88839e-285	0.35803	0.302	0.057	1.0083e-280	3
RAD23A	5.00011e-285	0.399828	0.365	0.082	1.29658e-280	3
FADS1	7.77072e-285	0.260527	0.195	0.022	2.01503e-280	3
TRIM27	9.89784e-285	0.274728	0.212	0.026	2.56661e-280	3
EIF4EBP1	1.09415e-284	0.405813	0.377	0.088	2.83725e-280	3
EIF6	1.43827e-284	0.370964	0.323	0.065	3.72957e-280	3
SMCHD1	1.4966e-284	0.259393	0.205	0.025	3.88083e-280	3
PLEKHA2	1.66229e-284	0.290833	0.24	0.035	4.31049e-280	3
YME1L1	1.84405e-284	0.3289	0.277	0.048	4.78181e-280	3
SGCA	1.92864e-284	0.370157	0.33	0.068	5.00116e-280	3
CAND1	3.0282e-284	0.274467	0.219	0.029	7.85242e-280	3
FBXW5	3.60626e-284	0.438031	0.39	0.094	9.35138e-280	3
DARS1	5.7074e-284	0.269075	0.216	0.028	1.47999e-279	3
PDIA6	6.0554e-284	0.421861	0.404	0.099	1.57023e-279	3
WAC	6.16976e-284	0.328609	0.27	0.045	1.59988e-279	3
NECAB3	9.61048e-284	0.336049	0.273	0.047	2.49209e-279	3
LRRC47	9.77001e-284	0.321471	0.261	0.042	2.53346e-279	3
CIAO1	1.00112e-283	0.284516	0.227	0.031	2.596e-279	3
DDX24	1.02017e-283	0.338349	0.277	0.048	2.6454e-279	3
CAVIN1	1.20286e-283	0.397451	0.37	0.085	3.11914e-279	3
FSTL3	1.49991e-283	0.320692	0.251	0.039	3.88941e-279	3
HGS	3.25323e-283	0.293902	0.236	0.034	8.43594e-279	3
BPNT2	6.92316e-283	0.287585	0.227	0.031	1.79524e-278	3
ABCC9	7.16981e-283	0.25698	0.19	0.021	1.8592e-278	3
HMGCS1	7.17673e-283	0.297907	0.231	0.033	1.861e-278	3
PSME2	1.29819e-282	0.397498	0.353	0.078	3.36634e-278	3
RBM6	1.42949e-282	0.273783	0.218	0.029	3.70681e-278	3
RBM25	2.16077e-282	0.281819	0.208	0.026	5.60309e-278	3
ATP1B3	2.5294e-282	0.264325	0.206	0.025	6.55898e-278	3
PRC1	5.14812e-282	0.252603	0.196	0.022	1.33496e-277	3
DNM1L	5.93362e-282	0.291018	0.239	0.035	1.53865e-277	3
KRT10	7.51022e-282	0.417083	0.427	0.107	1.94748e-277	3
ERH	2.88439e-281	0.369324	0.314	0.063	7.47952e-277	3
SNX5	3.07931e-281	0.289945	0.234	0.034	7.98495e-277	3
PMPCA	4.54294e-281	0.304583	0.253	0.04	1.17803e-276	3
DBN1	5.26216e-281	0.263101	0.211	0.027	1.36453e-276	3
PBX1	5.57649e-281	0.332154	0.282	0.05	1.44604e-276	3
COA3	6.36664e-281	0.388721	0.361	0.081	1.65093e-276	3
PPP1R13B	7.82691e-281	0.289755	0.231	0.033	2.0296e-276	3
SYPL1	7.98801e-281	0.320737	0.267	0.045	2.07137e-276	3
CITED4	2.0687e-280	0.303485	0.252	0.04	5.36434e-276	3
ZMIZ1	2.38445e-280	0.281419	0.227	0.032	6.18311e-276	3
WBP11	2.79181e-280	0.290083	0.237	0.035	7.23945e-276	3
PPM1K	2.82221e-280	0.253326	0.203	0.025	7.31828e-276	3
SEC61A1	3.67136e-280	0.357607	0.315	0.063	9.5202e-276	3
KIAA0232	5.15084e-280	0.272203	0.208	0.026	1.33566e-275	3
REPIN1	6.24273e-280	0.315171	0.259	0.042	1.6188e-275	3
KXD1	7.04312e-280	0.311443	0.248	0.039	1.82635e-275	3
ETV1	7.66119e-280	0.26669	0.22	0.029	1.98662e-275	3
HSPB6	8.68191e-280	0.417413	0.47	0.126	2.25131e-275	3
AP2A2	1.082e-279	0.264913	0.214	0.028	2.80572e-275	3
SCAF11	1.35202e-279	0.298542	0.24	0.036	3.50591e-275	3
PGP	2.21343e-279	0.300045	0.25	0.039	5.73966e-275	3
RNF5	2.67499e-279	0.317421	0.278	0.049	6.93651e-275	3
TOMM40	3.27283e-279	0.308172	0.253	0.04	8.48678e-275	3
HPS1	3.74209e-279	0.271948	0.223	0.03	9.70361e-275	3
BUB3	6.17492e-279	0.262372	0.201	0.024	1.60122e-274	3
SOGA1	7.19556e-279	0.25558	0.197	0.023	1.86588e-274	3
CARHSP1	7.57706e-279	0.364679	0.34	0.073	1.96481e-274	3
EEF1G	9.10186e-279	0.385107	0.352	0.079	2.3602e-274	3
NUMA1	1.64152e-278	0.392181	0.348	0.077	4.25663e-274	3
FLII	1.8633e-278	0.303572	0.255	0.041	4.83173e-274	3
GNPAT	2.25114e-278	0.345884	0.29	0.054	5.83744e-274	3
COPB2	2.9709e-278	0.298964	0.245	0.038	7.70385e-274	3
CSPG4	3.00392e-278	0.337061	0.289	0.053	7.78946e-274	3
YY1	5.14115e-278	0.297159	0.243	0.037	1.33315e-273	3
GAMT	5.87123e-278	0.37485	0.334	0.072	1.52247e-273	3
TRIP12	7.72575e-278	0.302161	0.248	0.039	2.00336e-273	3
ZNF219	1.48651e-277	0.292002	0.237	0.035	3.85467e-273	3
AFAP1L1	2.15625e-277	0.281748	0.236	0.035	5.59138e-273	3
UROD	2.46727e-277	0.353443	0.299	0.057	6.39787e-273	3
LEPROTL1	2.69627e-277	0.261684	0.213	0.028	6.99169e-273	3
TOMM22	8.11732e-277	0.313911	0.269	0.046	2.1049e-272	3
TRA2B	8.60968e-277	0.291306	0.239	0.036	2.23258e-272	3
ZNF704	1.51761e-276	0.305509	0.254	0.041	3.93531e-272	3
EWSR1	2.29669e-276	0.326861	0.277	0.049	5.95556e-272	3
TUG1	2.90456e-276	0.262634	0.211	0.027	7.5318e-272	3
NDRG3	4.03213e-276	0.258596	0.206	0.026	1.04557e-271	3
EFTUD2	4.22277e-276	0.279788	0.228	0.033	1.09501e-271	3
TBC1D1	4.50894e-276	0.291052	0.241	0.037	1.16921e-271	3
TIMM9	1.07401e-275	0.282242	0.219	0.03	2.78503e-271	3
GUCY1A1	1.62214e-275	0.295572	0.239	0.036	4.20637e-271	3
AMD1	2.19187e-275	0.261026	0.201	0.024	5.68374e-271	3
RNF181	2.39539e-275	0.371297	0.336	0.073	6.21147e-271	3
PTPN21	2.60024e-275	0.28426	0.222	0.031	6.74267e-271	3
CABIN1	2.98803e-275	0.326722	0.277	0.049	7.74827e-271	3
NELFE	6.10905e-275	0.356638	0.309	0.062	1.58414e-270	3
KIF13A	7.40085e-275	0.274336	0.22	0.03	1.91911e-270	3
MLLT1	1.0085e-274	0.324884	0.249	0.04	2.61514e-270	3
CLPTM1L	1.04862e-274	0.302164	0.248	0.039	2.71918e-270	3
DCXR	1.06412e-274	0.377994	0.329	0.07	2.75937e-270	3
PMPCB	1.37211e-274	0.305623	0.252	0.041	3.55801e-270	3
ZFR	1.40274e-274	0.28695	0.229	0.033	3.63744e-270	3
GPS1	1.74642e-274	0.333167	0.299	0.058	4.52864e-270	3
SND1	2.58218e-274	0.297603	0.242	0.037	6.69584e-270	3
PPID	3.06241e-274	0.299265	0.24	0.037	7.94115e-270	3
ATP6V1D	3.56441e-274	0.313116	0.255	0.042	9.24287e-270	3
NAA60	6.0812e-274	0.255589	0.202	0.025	1.57692e-269	3
SRSF1	6.09314e-274	0.29117	0.237	0.036	1.58001e-269	3
H2BC21	6.28024e-274	0.256305	0.206	0.026	1.62853e-269	3
NME1	6.32732e-274	0.292827	0.246	0.038	1.64074e-269	3
RARS1	6.42132e-274	0.287807	0.233	0.034	1.66511e-269	3
LAMB1	6.43776e-274	0.375991	0.361	0.082	1.66938e-269	3
TCF25	6.47864e-274	0.31165	0.269	0.047	1.67998e-269	3
GANAB	9.90799e-274	0.349557	0.295	0.057	2.56924e-269	3
DYNC1I2	1.11735e-273	0.331057	0.285	0.053	2.8974e-269	3
SCARB2	1.45189e-273	0.330728	0.298	0.057	3.76489e-269	3
C9orf16	2.18053e-273	0.339151	0.297	0.057	5.65434e-269	3
LSM5	2.84184e-273	0.355354	0.295	0.057	7.36917e-269	3
NOP56	3.56822e-273	0.276408	0.227	0.032	9.25275e-269	3
RNF10	3.6172e-273	0.316936	0.273	0.048	9.37975e-269	3
RILPL1	4.26544e-273	0.294914	0.234	0.035	1.10607e-268	3
SPCS1	1.74683e-272	0.373878	0.33	0.071	4.5297e-268	3
TMEM50A	3.5206e-272	0.356429	0.313	0.064	9.12928e-268	3
SLC1A4	4.17654e-272	0.296504	0.241	0.037	1.08302e-267	3
NXN	1.25528e-271	0.267865	0.206	0.026	3.25507e-267	3
DDX1	1.65022e-271	0.310247	0.273	0.048	4.27919e-267	3
CAPZB	1.93552e-271	0.378676	0.339	0.074	5.019e-267	3
HSPA4	3.88116e-271	0.277133	0.221	0.031	1.00642e-266	3
TNIP1	4.43775e-271	0.299811	0.253	0.042	1.15075e-266	3
RER1	5.07209e-271	0.311802	0.264	0.045	1.31524e-266	3
HNRNPUL1	5.38495e-271	0.314747	0.267	0.047	1.39637e-266	3
SMG5	6.03654e-271	0.311695	0.251	0.041	1.56534e-266	3
RABAC1	6.8741e-271	0.421872	0.417	0.109	1.78252e-266	3
TXNDC17	7.0537e-271	0.363298	0.32	0.067	1.82909e-266	3
AP2A1	7.25264e-271	0.277784	0.217	0.03	1.88068e-266	3
UBA3	1.47806e-270	0.342801	0.282	0.052	3.83276e-266	3
COA4	1.9767e-270	0.34154	0.297	0.058	5.12579e-266	3
SEPTIN9	2.04275e-270	0.366496	0.324	0.069	5.29705e-266	3
BZW1	2.36725e-270	0.29217	0.239	0.037	6.13851e-266	3
PACS1	2.37756e-270	0.314222	0.261	0.044	6.16526e-266	3
RAB5IF	3.206e-270	0.306486	0.256	0.043	8.31348e-266	3
CDC16	4.67908e-270	0.259856	0.207	0.027	1.21333e-265	3
ACAT1	5.16334e-270	0.376686	0.358	0.082	1.33891e-265	3
MOB4	5.2199e-270	0.293775	0.24	0.037	1.35357e-265	3
PRMT5	5.57498e-270	0.272715	0.217	0.03	1.44565e-265	3
MYH6	5.74853e-270	0.458057	0.44	0.122	1.49065e-265	3
STYXL2	5.99328e-270	0.302382	0.237	0.036	1.55412e-265	3
TCEAL8	6.79219e-270	0.307003	0.271	0.048	1.76128e-265	3
WWTR1	9.35291e-270	0.302701	0.25	0.041	2.4253e-265	3
MLEC	2.99124e-269	0.321867	0.263	0.045	7.75657e-265	3
DTNA	3.12466e-269	0.312634	0.269	0.047	8.10257e-265	3
AHSA1	4.20185e-269	0.324711	0.266	0.047	1.08958e-264	3
PHKA2	4.37072e-269	0.256096	0.19	0.022	1.13337e-264	3
RUVBL2	4.37551e-269	0.320615	0.274	0.049	1.13461e-264	3
PCM1	4.53353e-269	0.287149	0.239	0.037	1.17559e-264	3
AAMP	6.16358e-269	0.311851	0.266	0.047	1.59828e-264	3
TPX2	9.5966e-269	0.261437	0.198	0.024	2.48849e-264	3
NECTIN2	1.18148e-268	0.327987	0.259	0.044	3.0637e-264	3
SERPINH1	1.41295e-268	0.426897	0.489	0.141	3.66391e-264	3
UBR1	1.89157e-268	0.250405	0.198	0.024	4.90504e-264	3
TMEM59	1.897e-268	0.381751	0.354	0.081	4.91912e-264	3
SELENON	1.95238e-268	0.290936	0.247	0.04	5.06273e-264	3
RAB5B	2.36278e-268	0.314809	0.259	0.044	6.12693e-264	3
ARHGAP5	3.57168e-268	0.31135	0.251	0.041	9.26174e-264	3
CDK2AP1	9.89857e-268	0.356033	0.328	0.071	2.5668e-263	3
COPS5	1.05088e-267	0.302312	0.255	0.043	2.72504e-263	3
ECHS1	1.55255e-267	0.362495	0.334	0.073	4.02591e-263	3
C1orf43	1.62698e-267	0.343328	0.302	0.06	4.21891e-263	3
DCAF6	1.89316e-267	0.303795	0.247	0.04	4.90914e-263	3
OPA1	1.9981e-267	0.278136	0.211	0.028	5.18128e-263	3
SIVA1	2.15745e-267	0.410225	0.376	0.092	5.59447e-263	3
DPY19L4	2.37963e-267	0.29384	0.242	0.038	6.17063e-263	3
CKAP5	2.8261e-267	0.264867	0.208	0.027	7.32836e-263	3
SDF4	4.50408e-267	0.367282	0.339	0.075	1.16795e-262	3
TMED9	6.56897e-267	0.36848	0.339	0.076	1.7034e-262	3
SF3B3	6.70889e-267	0.276474	0.234	0.036	1.73968e-262	3
HNRNPR	9.58029e-267	0.320048	0.267	0.047	2.48427e-262	3
PAXX	1.03082e-266	0.351211	0.304	0.061	2.67303e-262	3
EPN1	1.2556e-266	0.338328	0.297	0.059	3.25591e-262	3
MAF1	4.31613e-266	0.391465	0.351	0.081	1.11922e-261	3
AKT1	4.3901e-266	0.323084	0.284	0.054	1.1384e-261	3
MRPS11	4.76709e-266	0.309643	0.255	0.043	1.23615e-261	3
SRRM1	1.30211e-265	0.290285	0.223	0.033	3.37651e-261	3
NDUFAF4	1.4196e-265	0.316983	0.261	0.045	3.68116e-261	3
HNRNPH2	1.48238e-265	0.312359	0.252	0.042	3.84396e-261	3
SLC25A12	2.21506e-265	0.298311	0.237	0.037	5.74387e-261	3
MFF	2.51371e-265	0.324654	0.271	0.049	6.51831e-261	3
EXOC7	4.06731e-265	0.301699	0.255	0.043	1.05469e-260	3
STOML2	8.86346e-265	0.357485	0.309	0.064	2.29838e-260	3
FBLIM1	9.44992e-265	0.314368	0.246	0.04	2.45046e-260	3
RBM10	9.93595e-265	0.303153	0.251	0.042	2.57649e-260	3
ERCC1	1.31892e-264	0.328002	0.28	0.053	3.42009e-260	3
UBE2T	1.37157e-264	0.299841	0.253	0.042	3.55662e-260	3
SURF4	1.68921e-264	0.310048	0.269	0.048	4.3803e-260	3
ARFGAP2	2.46083e-264	0.316419	0.252	0.042	6.38118e-260	3
ANKH	4.38237e-264	0.346062	0.295	0.059	1.13639e-259	3
RSL24D1	4.99097e-264	0.3008	0.255	0.043	1.29421e-259	3
FAM136A	8.87253e-264	0.266404	0.222	0.032	2.30073e-259	3
EPRS1	1.00982e-263	0.270412	0.216	0.03	2.61857e-259	3
DYNLRB1	1.5411e-263	0.395966	0.382	0.095	3.99623e-259	3
COQ4	1.8553e-263	0.32334	0.273	0.05	4.81098e-259	3
TMED4	2.03673e-263	0.336874	0.297	0.059	5.28144e-259	3
OSBPL9	2.04213e-263	0.276423	0.216	0.031	5.29544e-259	3
GRN	2.91758e-263	0.370745	0.347	0.08	7.56558e-259	3
KRBA1	3.68545e-263	0.297964	0.235	0.037	9.55674e-259	3
AC007325.4	3.82841e-263	0.287019	0.236	0.037	9.92746e-259	3
ECSIT	4.50237e-263	0.345611	0.302	0.061	1.16751e-258	3
SMARCC1	4.90329e-263	0.25123	0.196	0.025	1.27147e-258	3
TAF7	5.33054e-263	0.310755	0.264	0.047	1.38226e-258	3
TXN	7.61049e-263	0.369115	0.324	0.07	1.97348e-258	3
EIF2B5	1.82801e-262	0.256255	0.202	0.026	4.74022e-258	3
DHX30	3.27565e-262	0.320306	0.278	0.052	8.49408e-258	3
ARIH1	3.8041e-262	0.262801	0.217	0.031	9.86441e-258	3
PLEKHA1	5.01115e-262	0.29212	0.228	0.035	1.29944e-257	3
MAST2	6.88851e-262	0.361131	0.298	0.06	1.78626e-257	3
GTF3C1	1.68684e-261	0.323527	0.271	0.05	4.37413e-257	3
UBE2L3	2.60645e-261	0.348453	0.308	0.064	6.75878e-257	3
UBR4	2.82323e-261	0.306493	0.246	0.041	7.32092e-257	3
DCTPP1	3.37492e-261	0.270154	0.215	0.03	8.75152e-257	3
PDAP1	4.57436e-261	0.355008	0.308	0.065	1.18618e-256	3
PPP4C	1.18539e-260	0.313851	0.258	0.045	3.07385e-256	3
CHCHD1	2.26558e-260	0.355645	0.315	0.068	5.87487e-256	3
FEM1B	2.3809e-260	0.300508	0.247	0.041	6.17391e-256	3
PLIN2	2.48243e-260	0.301309	0.253	0.043	6.4372e-256	3
NCBP2AS2	8.1449e-260	0.253704	0.198	0.026	2.11205e-255	3
HTATSF1	8.42437e-260	0.282315	0.234	0.037	2.18452e-255	3
PKD1	8.75743e-260	0.380432	0.331	0.074	2.27089e-255	3
ABCF3	1.07651e-259	0.25408	0.201	0.026	2.79151e-255	3
CPNE1	1.51744e-259	0.333002	0.285	0.056	3.93487e-255	3
PPP2R3A	1.77571e-259	0.268074	0.222	0.033	4.60459e-255	3
LTBP3	2.31879e-259	0.392191	0.372	0.091	6.01287e-255	3
STOM	2.32311e-259	0.310374	0.246	0.041	6.02405e-255	3
APEH	3.29702e-259	0.2875	0.237	0.038	8.54949e-255	3
MRPL2	6.26333e-259	0.301615	0.252	0.043	1.62414e-254	3
TBL1XR1	6.44133e-259	0.369363	0.327	0.073	1.6703e-254	3
PIN4	9.76667e-259	0.324264	0.29	0.058	2.5326e-254	3
S100A4	1.02354e-258	0.413124	0.437	0.119	2.65413e-254	3
MRPS23	1.13705e-258	0.338946	0.29	0.058	2.9485e-254	3
PPP1CA	1.50788e-258	0.384726	0.347	0.081	3.91008e-254	3
MCAM	1.55839e-258	0.273014	0.213	0.03	4.04107e-254	3
ARIH2	1.71046e-258	0.303669	0.274	0.051	4.43539e-254	3
LENG8	1.88126e-258	0.257162	0.196	0.025	4.87829e-254	3
TSTD1	3.14012e-258	0.344238	0.302	0.062	8.14265e-254	3
P3H4	3.37733e-258	0.255918	0.192	0.024	8.75776e-254	3
MIGA2	3.94751e-258	0.257591	0.194	0.024	1.02363e-253	3
KARS1	6.52896e-258	0.29038	0.242	0.04	1.69302e-253	3
CDC34	6.76607e-258	0.35721	0.32	0.07	1.75451e-253	3
CLK1	7.06184e-258	0.293737	0.239	0.039	1.83121e-253	3
GPBP1	7.85972e-258	0.272629	0.219	0.032	2.0381e-253	3
KIAA2013	1.34501e-257	0.267031	0.212	0.03	3.48774e-253	3
MYO1C	2.07703e-257	0.363139	0.331	0.075	5.38596e-253	3
ACADS	5.36116e-257	0.320567	0.245	0.041	1.3902e-252	3
IARS1	9.68164e-257	0.298757	0.244	0.041	2.51055e-252	3
CIAPIN1	9.82871e-257	0.268111	0.218	0.032	2.54868e-252	3
CSNK1D	1.1673e-256	0.272714	0.218	0.032	3.02692e-252	3
PSMD3	1.42415e-256	0.299835	0.25	0.043	3.69296e-252	3
UBE2Z	3.89175e-256	0.271778	0.218	0.032	1.00917e-251	3
SH2B1	5.24989e-256	0.272927	0.219	0.032	1.36135e-251	3
GOLPH3	1.56471e-255	0.291713	0.241	0.04	4.05744e-251	3
MSRB2	1.87332e-255	0.407368	0.43	0.117	4.85769e-251	3
PDK2	2.48463e-255	0.36645	0.348	0.082	6.44291e-251	3
BCAP31	4.77987e-255	0.325584	0.285	0.056	1.23947e-250	3
CNIH1	8.11305e-255	0.289852	0.234	0.038	2.10379e-250	3
TMEM256	1.08427e-254	0.39903	0.396	0.103	2.81162e-250	3
ATPAF1	1.21749e-254	0.319345	0.292	0.059	3.15707e-250	3
ELP5	1.80597e-254	0.338286	0.295	0.061	4.68305e-250	3
PXN	2.75499e-254	0.269991	0.221	0.033	7.14396e-250	3
CALR	3.23503e-254	0.422205	0.489	0.146	8.38874e-250	3
CSTF3	3.57719e-254	0.253838	0.205	0.028	9.276e-250	3
PUM2	3.99112e-254	0.270292	0.226	0.035	1.03494e-249	3
SON	4.20005e-254	0.347597	0.3	0.063	1.08912e-249	3
AGAP3	4.40632e-254	0.2798	0.23	0.036	1.1426e-249	3
ABHD18	7.65053e-254	0.262601	0.221	0.033	1.98386e-249	3
AC015813.2	1.87662e-253	0.262694	0.196	0.026	4.86625e-249	3
PGAP6	2.07153e-253	0.250536	0.203	0.028	5.3717e-249	3
C1orf122	3.03468e-253	0.413943	0.428	0.119	7.86923e-249	3
NPLOC4	3.58545e-253	0.302452	0.247	0.043	9.29743e-249	3
LMAN2	5.27286e-253	0.326002	0.273	0.052	1.36731e-248	3
SUMO1	5.73536e-253	0.311416	0.26	0.047	1.48724e-248	3
PHC2	9.58384e-253	0.356477	0.331	0.075	2.48518e-248	3
N4BP2L2	9.98563e-253	0.289107	0.248	0.043	2.58937e-248	3
TIMM17A	1.31358e-252	0.275715	0.228	0.036	3.40623e-248	3
SEC13	1.55997e-252	0.28658	0.248	0.043	4.04517e-248	3
GDI1	1.63723e-252	0.316891	0.264	0.049	4.24551e-248	3
PILRB	2.09882e-252	0.261257	0.202	0.028	5.44244e-248	3
TMEM129	2.12607e-252	0.294438	0.229	0.036	5.51312e-248	3
ATP6V1F	2.38055e-252	0.374214	0.367	0.091	6.17301e-248	3
NUTF2	4.17426e-252	0.29641	0.246	0.042	1.08243e-247	3
KIF5B	4.38041e-252	0.319213	0.277	0.053	1.13588e-247	3
PHLDA1	4.65096e-252	0.279278	0.221	0.034	1.20604e-247	3
PPP2R2D	4.92214e-252	0.25418	0.203	0.028	1.27636e-247	3
CASQ1	6.25421e-252	0.362226	0.303	0.064	1.62178e-247	3
GLUL	1.00224e-251	0.378983	0.412	0.109	2.59892e-247	3
DCTN1	1.75203e-251	0.296202	0.263	0.048	4.5432e-247	3
FAM3A	2.27193e-251	0.308382	0.267	0.05	5.89134e-247	3
PTBP1	2.67446e-251	0.280779	0.236	0.039	6.93513e-247	3
SNRPD1	3.19323e-251	0.297618	0.247	0.043	8.28036e-247	3
BEX4	4.98354e-251	0.316156	0.268	0.051	1.29228e-246	3
TMEM14B	5.13172e-251	0.348892	0.323	0.072	1.33071e-246	3
ATG4B	1.09395e-250	0.278905	0.218	0.033	2.83673e-246	3
SBF1	1.26466e-250	0.252094	0.204	0.028	3.2794e-246	3
AUP1	1.72917e-250	0.316422	0.273	0.052	4.48391e-246	3
LRRC39	2.09927e-250	0.281385	0.234	0.038	5.4436e-246	3
COPB1	2.16804e-250	0.27778	0.228	0.036	5.62193e-246	3
RBM24	3.76529e-250	0.562425	0.55	0.206	9.76378e-246	3
PAPOLA	3.89402e-250	0.448716	0.437	0.131	1.00976e-245	3
CARS2	8.11315e-250	0.281532	0.228	0.036	2.10382e-245	3
MYH10	1.27552e-249	0.250963	0.201	0.027	3.30755e-245	3
ATOX1	1.5207e-249	0.38248	0.361	0.09	3.94334e-245	3
ZSCAN18	1.65901e-249	0.297434	0.234	0.039	4.30198e-245	3
AP1M1	1.90203e-249	0.276434	0.228	0.037	4.93216e-245	3
HECA	2.45063e-249	0.254522	0.205	0.029	6.35474e-245	3
DNPH1	2.78967e-249	0.291375	0.236	0.039	7.23388e-245	3
FAM234A	2.94142e-249	0.346866	0.311	0.068	7.6274e-245	3
MCL1	3.62034e-249	0.310198	0.28	0.055	9.38791e-245	3
METRNL	3.67639e-249	0.313033	0.269	0.052	9.53324e-245	3
IGF2R	4.12791e-249	0.251941	0.205	0.029	1.07041e-244	3
CTNNAL1	4.62817e-249	0.263591	0.207	0.03	1.20013e-244	3
MLST8	6.50025e-249	0.276438	0.223	0.035	1.68558e-244	3
CPSF1	6.57792e-249	0.256319	0.212	0.031	1.70572e-244	3
MZT2A	6.65396e-249	0.388899	0.442	0.123	1.72544e-244	3
LAMTOR2	6.69288e-249	0.353593	0.341	0.081	1.73553e-244	3
MRPL4	2.1174e-248	0.284795	0.233	0.038	5.49062e-244	3
SYNE2	2.59486e-248	0.26642	0.218	0.033	6.72874e-244	3
TAX1BP1	3.58573e-248	0.313852	0.264	0.05	9.29815e-244	3
VPS28	4.20758e-248	0.394677	0.384	0.101	1.09107e-243	3
CSNK2A1	4.40465e-248	0.273815	0.223	0.035	1.14217e-243	3
ZNF638	6.24733e-248	0.26486	0.215	0.032	1.62e-243	3
SMG1	6.5939e-248	0.252436	0.201	0.028	1.70986e-243	3
SLC38A10	6.91043e-248	0.301204	0.249	0.044	1.79194e-243	3
UBQLN1	7.00446e-248	0.255252	0.208	0.03	1.81633e-243	3
TAF10	7.72775e-248	0.391549	0.39	0.102	2.00388e-243	3
KANK2	7.78395e-248	0.32544	0.3	0.064	2.01846e-243	3
UXT	9.07308e-248	0.367334	0.368	0.092	2.35274e-243	3
PHLDB2	9.20231e-248	0.348254	0.315	0.07	2.38625e-243	3
ACADM	1.41717e-247	0.306419	0.262	0.049	3.67486e-243	3
USP9X	2.45512e-247	0.262601	0.218	0.033	6.36637e-243	3
ITGB5	2.84668e-247	0.284245	0.238	0.04	7.38172e-243	3
CLSTN1	2.94505e-247	0.293849	0.253	0.046	7.6368e-243	3
CBX6	3.08614e-247	0.31074	0.263	0.049	8.00266e-243	3
SLMAP	4.12339e-247	0.341655	0.296	0.062	1.06924e-242	3
COMMD7	4.42015e-247	0.291241	0.242	0.042	1.14619e-242	3
WIPI1	5.42268e-247	0.272843	0.211	0.031	1.40615e-242	3
LNPEP	7.28317e-247	0.277686	0.231	0.038	1.8886e-242	3
SRP19	7.60997e-247	0.256879	0.212	0.032	1.97334e-242	3
MCM6	9.29234e-247	0.275681	0.22	0.034	2.4096e-242	3
SNRPA	1.15257e-246	0.272502	0.208	0.031	2.98873e-242	3
OAZ2	1.162e-246	0.304723	0.256	0.047	3.01318e-242	3
RAB18	1.7137e-246	0.282804	0.233	0.038	4.44378e-242	3
CUEDC2	2.97495e-246	0.357783	0.342	0.082	7.71435e-242	3
PSMD13	4.26926e-246	0.290277	0.237	0.04	1.10706e-241	3
MYZAP	8.1651e-246	0.357665	0.358	0.087	2.11729e-241	3
EIF2S2	8.70351e-246	0.335466	0.292	0.061	2.25691e-241	3
TMEM248	9.62193e-246	0.277375	0.238	0.04	2.49506e-241	3
COPS8	1.01453e-245	0.276051	0.23	0.038	2.63076e-241	3
STT3B	1.10415e-245	0.279462	0.23	0.038	2.86318e-241	3
DLC1	1.69447e-245	0.310798	0.262	0.049	4.39392e-241	3
CERS6	1.94826e-245	0.269629	0.231	0.038	5.05204e-241	3
TMEM127	2.17518e-245	0.265814	0.218	0.034	5.64045e-241	3
GJC1	3.22707e-245	0.258753	0.214	0.032	8.36813e-241	3
ISCA1	4.40517e-245	0.313674	0.266	0.051	1.1423e-240	3
THRAP3	5.11478e-245	0.299327	0.248	0.044	1.32631e-240	3
MRPS35	6.64003e-245	0.252864	0.206	0.03	1.72183e-240	3
FAT1	6.81136e-245	0.279066	0.231	0.038	1.76625e-240	3
NES	8.13504e-245	0.366244	0.322	0.074	2.1095e-240	3
MRPL47	1.05665e-244	0.257242	0.21	0.031	2.74e-240	3
PIGS	1.20522e-244	0.253496	0.202	0.029	3.12527e-240	3
TM9SF2	1.25097e-244	0.255688	0.215	0.033	3.2439e-240	3
CIBAR1	1.57285e-244	0.27352	0.217	0.033	4.07857e-240	3
GLO1	2.50562e-244	0.302247	0.263	0.05	6.49732e-240	3
SCAMP3	4.14921e-244	0.274236	0.225	0.036	1.07593e-239	3
ARL2BP	4.26753e-244	0.27182	0.211	0.032	1.10661e-239	3
PLCXD3	4.55627e-244	0.297978	0.263	0.05	1.18149e-239	3
PJA2	4.93962e-244	0.29641	0.257	0.047	1.28089e-239	3
TMEM223	5.01689e-244	0.268037	0.221	0.035	1.30093e-239	3
RNH1	6.29891e-244	0.3456	0.318	0.072	1.63337e-239	3
RPN1	6.90731e-244	0.310779	0.246	0.044	1.79114e-239	3
WDR82	8.31888e-244	0.259072	0.202	0.029	2.15717e-239	3
COQ9	8.85961e-244	0.287771	0.271	0.053	2.29739e-239	3
PEBP1	1.10304e-243	0.379554	0.379	0.098	2.86029e-239	3
NAA10	1.96671e-243	0.349161	0.307	0.068	5.09986e-239	3
UPP1	2.10745e-243	0.264552	0.21	0.031	5.46482e-239	3
TANC1	2.3712e-243	0.29126	0.249	0.045	6.14876e-239	3
SNRPD3	7.56558e-243	0.34925	0.316	0.071	1.96183e-238	3
NELFB	1.08503e-242	0.269234	0.223	0.036	2.8136e-238	3
HAGH	1.1466e-242	0.313725	0.283	0.058	2.97326e-238	3
GTF2A2	1.31755e-242	0.30787	0.271	0.053	3.41655e-238	3
WDR13	1.74132e-242	0.351236	0.304	0.067	4.51542e-238	3
LONP2	2.06295e-242	0.256937	0.207	0.03	5.34944e-238	3
SPG7	2.09868e-242	0.295046	0.246	0.044	5.4421e-238	3
PTMS	2.174e-242	0.397377	0.416	0.116	5.63741e-238	3
RANBP1	2.5207e-242	0.322043	0.276	0.055	6.53643e-238	3
SH3GLB2	3.26586e-242	0.276287	0.234	0.04	8.46871e-238	3
FAM120A	4.04897e-242	0.304833	0.271	0.053	1.04994e-237	3
LRRC41	4.05658e-242	0.287495	0.238	0.041	1.05191e-237	3
CHMP5	5.89352e-242	0.291326	0.246	0.044	1.52825e-237	3
CTDSP2	8.26416e-242	0.313605	0.272	0.054	2.14298e-237	3
PGM5	8.66395e-242	0.273132	0.234	0.04	2.24665e-237	3
HECTD1	1.18929e-241	0.2703	0.229	0.038	3.08394e-237	3
CTSL	2.26289e-241	0.299248	0.26	0.049	5.8679e-237	3
MRPS18C	3.57346e-241	0.308632	0.274	0.055	9.26634e-237	3
PAFAH1B2	5.37064e-241	0.269494	0.226	0.037	1.39266e-236	3
CDC37	6.53939e-241	0.356532	0.308	0.069	1.69573e-236	3
AQP1	1.12999e-240	0.344292	0.318	0.073	2.93016e-236	3
PPA1	1.49949e-240	0.25868	0.216	0.034	3.88833e-236	3
SAMM50	1.51791e-240	0.276054	0.226	0.037	3.93608e-236	3
RWDD1	1.62282e-240	0.31409	0.279	0.057	4.20815e-236	3
TRPC4AP	1.6415e-240	0.265899	0.215	0.033	4.25658e-236	3
TNRC18	2.04934e-240	0.255182	0.206	0.031	5.31414e-236	3
SERPINB6	2.29967e-240	0.323421	0.281	0.058	5.96327e-236	3
MARS1	2.40857e-240	0.259169	0.205	0.03	6.24566e-236	3
TMUB1	3.7477e-240	0.278712	0.237	0.041	9.71816e-236	3
C5orf15	5.99371e-240	0.254852	0.215	0.033	1.55423e-235	3
METAP1	6.16641e-240	0.26663	0.218	0.035	1.59901e-235	3
DNAJB9	6.96923e-240	0.251291	0.201	0.029	1.80719e-235	3
TRA2A	7.791e-240	0.270331	0.21	0.032	2.02029e-235	3
SF3B2	8.6309e-240	0.291412	0.262	0.05	2.23808e-235	3
[truncated: 4,542 more rows]
